# Supplementary material for: CRISPR/Cas9-Mediated Targeted Mutagenesis of GmUGT Enhanced Soybean Resistance Against Leaf-Chewing Insects Through Flavonoids Biosynthesis
Source: Frontiers journal article supplement (doi:10.3389/fpls.2022.802716), 2022-02-22
Supplement: Data_Sheet_1.zip [file Data_Sheet_1.zip]

## Sheet: Table 4
Table 4 Differentially expressed genes in ko-3 versus WT plants unattacked with the |log2 (Fold Change)|≥1 and false discovery rate (FDR) ≤ 0.05
#ID	WT_FPKM	ko-3_FPKM	FDR	log2FC	regulated	COG_class	COG_class_annotation	GO_annotation	KEGG_annotation	KEGG_pathway_annotation	KOG_class	KOG_class_annotation	Pfam_annotation	Swiss-Prot_annotation	eggNOG_class	eggNOG_class_annotation	NR_annotation
Glyma.06G170300.Wm82.a2.v1	7.7301	21.9781	1.45179e-29	1.54537	up	[T]	Signal transduction mechanisms	Molecular Function: acid phosphatase activity (GO:0003993);; Molecular Function: metal ion binding (GO:0046872);;	K22390|0.0e+00|gmx:100775672|K22390 acid phosphatase type 7 | (RefSeq) probable inactive purple acid phosphatase 27-like precursor	--	[G]	Carbohydrate transport and metabolism	Fn3-like domain from Purple Acid Phosphatase	Probable inactive purple acid phosphatase 27 OS=Arabidopsis thaliana OX=3702 GN=PAP27 PE=2 SV=1	G	Carbohydrate transport and metabolism	hypothetical protein GLYMA_06G170300 [Glycine max]
Glyma.07G206400.Wm82.a2.v1	11.0752	23.6255	3.96431e-07	1.11902	up	--	--	--	--	--	--	--	--	--	--	--	uncharacterized protein LOC100527185 [Glycine max]
Glyma.12G148200.Wm82.a2.v1	3.2119	6.58211	7.82389e-16	1.06973	up	[T]	Signal transduction mechanisms	Molecular Function: protein kinase activity (GO:0004672);; Molecular Function: ATP binding (GO:0005524);; Cellular Component: plasma membrane (GO:0005886);; Cellular Component: plasmodesma (GO:0009506);; Cellular Component: integral component of membrane (GO:0016021);; Biological Process: protein autophosphorylation (GO:0046777);;	K13435|5.2e-106|sly:101268866|K13435 serine/threonine-protein kinase Pto | (RefSeq) Pto; serine/threonine protein kinase Pto	Plant-pathogen interaction (ko04626)	[T]	Signal transduction mechanisms	Protein tyrosine and serine/threonine kinase	Receptor-like protein kinase THESEUS 1 OS=Arabidopsis thaliana OX=3702 GN=THE1 PE=1 SV=1	T	Signal transduction mechanisms	receptor-like protein kinase THESEUS 1 [Glycine max]
Glyma.01G120400.Wm82.a2.v1	3.92464	9.37245	8.01265e-15	1.29063	up	[I]	Lipid transport and metabolism	Biological Process: lipid metabolic process (GO:0006629);; Cellular Component: integral component of membrane (GO:0016021);; Molecular Function: oxidoreductase activity, acting on paired donors, with oxidation of a pair of donors resulting in the reduction of molecular oxygen to two molecules of water (GO:0016717);;	K10257|4.8e-276|gmx:100217335|K10257 acyl-lipid omega-3 desaturase [EC:1.14.19.25 1.14.19.35 1.14.19.36] | (RefSeq) FAD8-1; omega-3 fatty acid desaturase	--	--	--	Domain of unknown function (DUF3474)	Omega-3 fatty acid desaturase, chloroplastic OS=Glycine max OX=3847 GN=FAD7 PE=2 SV=1	I	Lipid transport and metabolism	omega-3 fatty acid desaturase [Glycine max]
Glyma.17G219200.Wm82.a2.v1	0.640316	1.63336	6.20452e-06	1.36296	up	--		Molecular Function: protein kinase activity (GO:0004672);; Molecular Function: ATP binding (GO:0005524);;	K00924|2.3e-93|csat:104712177|K00924 kinase [EC:2.7.1.-] | (RefSeq) probable receptor-like protein kinase At3g55450 isoform X1	--	[T]	Signal transduction mechanisms	Protein tyrosine and serine/threonine kinase	Serine/threonine-protein kinase RIPK OS=Arabidopsis thaliana OX=3702 GN=RIPK PE=1 SV=1	T	Signal transduction mechanisms	serine/threonine-protein kinase RIPK-like [Glycine soja]
Glyma.16G043200.Wm82.a2.v1	58.9808	28.6835	2.69101e-11	-1.00139	down	--	--	Molecular Function: DNA binding (GO:0003677);; Cellular Component: nucleus (GO:0005634);; Biological Process: regulation of transcription, DNA-templated (GO:0006355);;	K00521|4.6e-40|cmos:111447866|K00521 ferric-chelate reductase [EC:1.16.1.7] | (RefSeq) ferric reduction oxidase 7, chloroplastic-like	--	--	--	No apical meristem (NAM) protein	NAC transcription factor 47 OS=Arabidopsis thaliana OX=3702 GN=NAC047 PE=2 SV=1	K	Transcription	NAC transcription factor 47-like [Glycine soja]
Glyma.13G280000.Wm82.a2.v1	14.9167	4.9982	6.3257e-27	-1.535	down	--	--	Molecular Function: DNA binding (GO:0003677);; Cellular Component: nucleus (GO:0005634);; Biological Process: regulation of transcription, DNA-templated (GO:0006355);;	K00521|8.1e-43|cmos:111447866|K00521 ferric-chelate reductase [EC:1.16.1.7] | (RefSeq) ferric reduction oxidase 7, chloroplastic-like	--	--	--	No apical meristem (NAM) protein	NAC transcription factor 56 OS=Arabidopsis thaliana OX=3702 GN=NAC056 PE=2 SV=1	K	Transcription	NAC transcription factor 56 [Glycine max]
Glyma.02G190000.Wm82.a2.v1	4.01057	1.89425	4.38139e-10	-1.044	down	[R]	General function prediction only	Molecular Function: phospholipase A2 activity (GO:0004623);; Molecular Function: sterol esterase activity (GO:0004771);; Molecular Function: triglyceride lipase activity (GO:0004806);; Biological Process: lipid catabolic process (GO:0016042);;	K14674|0.0e+00|gmx:100817268|K14674 TAG lipase / steryl ester hydrolase / phospholipase A2 / LPA acyltransferase [EC:3.1.1.3 3.1.1.13 3.1.1.4 2.3.1.51] | (RefSeq) triacylglycerol lipase SDP1 isoform X1	Steroid biosynthesis (ko00100);; Glycerolipid metabolism (ko00561);; Glycerophospholipid metabolism (ko00564);; Ether lipid metabolism (ko00565);; Arachidonic acid metabolism (ko00590);; Linoleic acid metabolism (ko00591);; alpha-Linolenic acid metabolism (ko00592)	[R]	General function prediction only	Domain of unknown function (DUF3336)	Triacylglycerol lipase SDP1 OS=Arabidopsis thaliana OX=3702 GN=SDP1 PE=1 SV=1	I	Lipid transport and metabolism	triacylglycerol lipase SDP1 isoform X1 [Glycine max]
Glyma.11G189500.Wm82.a2.v1	3.01135	5.93467	7.40027e-09	1.01139	up	--	--	Cellular Component: nucleolus (GO:0005730);; Biological Process: seed dormancy process (GO:0010162);; Biological Process: negative regulation of transcription, DNA-templated (GO:0045892);;	K13463|2.9e-16|oeu:111398039|K13463 coronatine-insensitive protein 1 | (RefSeq) coronatine-insensitive protein 1-like	Plant hormone signal transduction (ko04075)	--	--	Nucleoplasmin-like domain	Histone deacetylase HDT1 OS=Glycine max OX=3847 GN=HDT1 PE=2 SV=1	K	Transcription	histone deacetylase HDT1 [Glycine max]
Glyma.05G119200.Wm82.a2.v1	12.9971	5.65207	0.0118799	-1.1485	down	[O]	Posttranslational modification, protein turnover, chaperones	--	K02634|2.7e-15|han:110919534|K02634 apocytochrome f | (RefSeq) uncharacterized protein LOC110919534	Photosynthesis (ko00195)	[O]	Posttranslational modification, protein turnover, chaperones	DnaJ domain	DnaJ protein ERDJ3B OS=Arabidopsis thaliana OX=3702 GN=ERDJ3B PE=1 SV=1	O	Posttranslational modification, protein turnover, chaperones	DnaJ domain-containing protein [Glycine max]
Glyma.15G076500.Wm82.a2.v1	289.046	83.1284	1.88921e-41	-1.76034	down	--	--	--	--	--	--	--	Dormancy/auxin associated protein	Dormancy-associated protein 1 OS=Pisum sativum OX=3888 GN=DRM1 PE=2 SV=1	S	Function unknown	hypothetical protein GLYMA_15G076500 [Glycine max]
Glyma.10G021300.Wm82.a2.v1	8.97373	29.9273	1.96469e-25	1.78039	up	--	--	Cellular Component: nucleus (GO:0005634);; Cellular Component: cytoplasm (GO:0005737);; Molecular Function: electron carrier activity (GO:0009055);; Molecular Function: protein disulfide oxidoreductase activity (GO:0015035);;	K03676|1.3e-51|gmx:100527558|K03676 glutaredoxin 3 | (RefSeq) uncharacterized protein LOC100527558	--	[O]	Posttranslational modification, protein turnover, chaperones	Glutaredoxin	Monothiol glutaredoxin-S9 OS=Arabidopsis thaliana OX=3702 GN=GRXS9 PE=1 SV=1	O	Posttranslational modification, protein turnover, chaperones	uncharacterized protein LOC100527558 [Glycine max]
Glyma.06G158800.Wm82.a2.v1	4.12549	9.27904	2.63503e-14	1.20314	up	--	--	Molecular Function: aspartic-type endopeptidase activity (GO:0004190);; Cellular Component: extracellular region (GO:0005576);; Biological Process: proteolysis (GO:0006508);; Biological Process: protein catabolic process (GO:0030163);;	K22683|1.9e-78|han:110891469|K22683 aspartyl protease family protein [EC:3.4.23.-] | (RefSeq) aspartyl protease family protein 2-like	--	[O]	Posttranslational modification, protein turnover, chaperones	Xylanase inhibitor N-terminal	Aspartic proteinase nepenthesin-1 OS=Nepenthes gracilis OX=150966 GN=nep1 PE=1 SV=1	O	Posttranslational modification, protein turnover, chaperones	aspartic proteinase nepenthesin-1 [Glycine max]
Glyma.15G002300.Wm82.a2.v1	0.0521807	0.655489	5.37263e-13	3.4859	up	--	--	Molecular Function: aspartic-type endopeptidase activity (GO:0004190);; Molecular Function: transferase activity (GO:0016740);;	K22683|7.2e-73|psom:113276415|K22683 aspartyl protease family protein [EC:3.4.23.-] | (RefSeq) aspartyl protease family protein 2	--	[O]	Posttranslational modification, protein turnover, chaperones	Xylanase inhibitor N-terminal	Aspartyl protease family protein At5g10770 OS=Arabidopsis thaliana OX=3702 GN=At5g10770 PE=2 SV=1	O	Posttranslational modification, protein turnover, chaperones	aspartyl protease family protein At5g10770 [Glycine max]
Glyma.08G356800.Wm82.a2.v1	0.658495	0.221463	3.15337e-05	-1.52742	down	[G]	Carbohydrate transport and metabolism	Molecular Function: pectate lyase activity (GO:0030570);; Biological Process: pectin catabolic process (GO:0045490);; Molecular Function: metal ion binding (GO:0046872);;	K01728|5.2e-262|gmx:100790659|K01728 pectate lyase [EC:4.2.2.2] | (RefSeq) probable pectate lyase 8	Pentose and glucuronate interconversions (ko00040)	--	--	Pectate lyase	Probable pectate lyase 20 OS=Arabidopsis thaliana OX=3702 GN=At5g48900 PE=2 SV=1	G	Carbohydrate transport and metabolism	probable pectate lyase 8 [Glycine max]
Glyma.03G225500.Wm82.a2.v1	1.11854	3.46058	2.47372e-14	1.68116	up	[H]	Coenzyme transport and metabolism	Molecular Function: hydrolase activity (GO:0016787);;	K18551|1.1e-161|gmx:100775435|K18551 pyrimidine and pyridine-specific 5'-nucleotidase [EC:3.1.3.-] | (RefSeq) uncharacterized protein C24B11.05 isoform X1	Nicotinate and nicotinamide metabolism (ko00760)	[R]	General function prediction only	Haloacid dehalogenase-like hydrolase	--	S	Function unknown	uncharacterized protein C24B11.05 isoform X1 [Glycine max]
Glyma.13G312500.Wm82.a2.v1	0.840932	2.14977	1.7812e-06	1.36221	up	--	--	--	--	--	--	--	Fantastic Four meristem regulator	Protein FAF-like, chloroplastic OS=Arabidopsis thaliana OX=3702 GN=At5g22090 PE=2 SV=1	S	Function unknown	protein FAF-like, chloroplastic [Glycine max]
Glyma.07G136200.Wm82.a2.v1	6.36039	2.04143	1.54737e-10	-1.58113	down	[IQR]	Lipid transport and metabolism;; Secondary metabolites biosynthesis, transport and catabolism;; General function prediction only	--	K08081|1.2e-149|gmx:100804946|K08081 tropinone reductase I [EC:1.1.1.206] | (RefSeq) tropinone reductase homolog At5g06060	Tropane, piperidine and pyridine alkaloid biosynthesis (ko00960)	[R]	General function prediction only	Enoyl-(Acyl carrier protein) reductase	Tropinone reductase homolog OS=Datura stramonium OX=4076 PE=2 SV=1	Q	Secondary metabolites biosynthesis, transport and catabolism	tropinone reductase homolog At5g06060 [Glycine max]
Glyma.08G158500.Wm82.a2.v1	6.93518	2.91868	8.3122e-09	-1.19988	down	--	--	Cellular Component: integral component of membrane (GO:0016021);;	K00558|1.2e-11|mdm:103452459|K00558 DNA (cytosine-5)-methyltransferase 1 [EC:2.1.1.37] | (RefSeq) DNA (cytosine-5)-methyltransferase CMT3	Cysteine and methionine metabolism (ko00270)	--	--	--	--	--	--	uncharacterized protein LOC100499949 [Glycine max]
Glyma.04G014700.Wm82.a2.v1	0.286645	1.54528	2.619e-08	2.37783	up	[O]	Posttranslational modification, protein turnover, chaperones	Molecular Function: cysteine-type endopeptidase activity (GO:0004197);; Cellular Component: extracellular space (GO:0005615);; Cellular Component: lysosome (GO:0005764);; Biological Process: proteolysis involved in cellular protein catabolic process (GO:0051603);;	K16290|1.0e-204|gmx:100788466|K16290 xylem cysteine proteinase [EC:3.4.22.-] | (RefSeq) uncharacterized protein LOC100788466	--	[O]	Posttranslational modification, protein turnover, chaperones	Papain family cysteine protease	Cysteine protease XCP2 OS=Arabidopsis thaliana OX=3702 GN=XCP2 PE=1 SV=2	O	Posttranslational modification, protein turnover, chaperones	uncharacterized protein LOC100788466 [Glycine max]
Glyma.02G261600.Wm82.a2.v1	0.430833	0.883066	0.0205523	1.03902	up	[DPM]	Cell cycle control, cell division, chromosome partitioning;; Inorganic ion transport and metabolism;; Cell wall/membrane/envelope biogenesis	Molecular Function: ferroxidase activity (GO:0004322);; Molecular Function: copper ion binding (GO:0005507);; Cellular Component: plasma membrane (GO:0005886);; Biological Process: iron ion transport (GO:0006826);; Biological Process: lignin catabolic process (GO:0046274);; Cellular Component: apoplast (GO:0048046);; Molecular Function: hydroquinone:oxygen oxidoreductase activity (GO:0052716);; B…	K05909|0.0e+00|gmx:100797749|K05909 laccase [EC:1.10.3.2] | (RefSeq) laccase-5	--	[Q]	Secondary metabolites biosynthesis, transport and catabolism	Multicopper oxidase	Laccase-5 OS=Arabidopsis thaliana OX=3702 GN=LAC5 PE=2 SV=1	Q	Secondary metabolites biosynthesis, transport and catabolism	laccase-5 [Glycine max]
Glyma.01G075800.Wm82.a2.v1	1.08534	0.455931	0.000317487	-1.22111	down	--	--	Molecular Function: DNA binding (GO:0003677);; Cellular Component: nucleus (GO:0005634);; Cellular Component: host cell nucleus (GO:0042025);; Molecular Function: metal ion binding (GO:0046872);;	K13415|3.7e-18|mdm:103413440|K13415 protein brassinosteroid insensitive 1 [EC:2.7.10.1 2.7.11.1] | (RefSeq) uncharacterized protein LOC103413440 isoform X1	Plant hormone signal transduction (ko04075)	--	--	SBP domain	Squamosa promoter-binding-like protein 7 OS=Oryza sativa subsp. indica OX=39946 GN=SPL7 PE=2 SV=1	S	Function unknown	squamosa promoter-binding-like protein 7 isoform X1 [Glycine max]
Glyma.01G137100.Wm82.a2.v1	10.4572	0.861808	1.88996e-38	-3.51485	down	[Q]	Secondary metabolites biosynthesis, transport and catabolism	Molecular Function: metal ion binding (GO:0046872);; Molecular Function: dioxygenase activity (GO:0051213);;	K24028|5.3e-48|cam:101507933|K24028 salicylic acid 3-hydroxylase [EC:1.14.11.-] | (RefSeq) flavonol synthase/flavanone 3-hydroxylase-like	--	[QR]	Secondary metabolites biosynthesis, transport and catabolism;; General function prediction only	2OG-Fe(II) oxygenase superfamily	2-oxoglutarate-dependent dioxygenase 19 OS=Oryza sativa subsp. japonica OX=39947 GN=2ODD19 PE=1 SV=1	Q	Secondary metabolites biosynthesis, transport and catabolism	hypothetical protein GLYMA_01G137100 [Glycine max]
Glyma.11G044200.Wm82.a2.v1	5.51095	16.0238	1.00641e-23	1.58268	up	--	--	Molecular Function: GTPase activity (GO:0003924);; Molecular Function: structural constituent of cytoskeleton (GO:0005200);; Molecular Function: GTP binding (GO:0005525);; Cellular Component: cytoplasm (GO:0005737);; Cellular Component: microtubule (GO:0005874);; Biological Process: microtubule-based process (GO:0007017);;	K07374|1.8e-262|gmx:100785622|K07374 tubulin alpha | (RefSeq) tubulin alpha-2 chain	Phagosome (ko04145)	[Z]	Cytoskeleton	Tubulin/FtsZ family, GTPase domain	Tubulin alpha-2 chain OS=Zea mays OX=4577 GN=TUBA2 PE=3 SV=1	Z	Cytoskeleton	tubulin alpha-2 chain [Glycine max]
Glyma.15G268400.Wm82.a2.v1	1.58768	0.764771	0.000852675	-1.0277	down	[H]	Coenzyme transport and metabolism	Molecular Function: catalytic activity (GO:0003824);; Biological Process: Mo-molybdopterin cofactor biosynthetic process (GO:0006777);; Cellular Component: molybdopterin synthase complex (GO:0019008);; Molecular Function: metal ion binding (GO:0046872);; Molecular Function: 4 iron, 4 sulfur cluster binding (GO:0051539);;	K03639|9.6e-236|gmx:100776612|K03639 GTP 3',8-cyclase [EC:4.1.99.22] | (RefSeq) GTP 3',8-cyclase, mitochondrial isoform X1	Folate biosynthesis (ko00790);; Sulfur relay system (ko04122)	[H]	Coenzyme transport and metabolism	Molybdenum Cofactor Synthesis C	GTP 3',8-cyclase, mitochondrial OS=Arabidopsis thaliana OX=3702 GN=CNX2 PE=1 SV=1	H	Coenzyme transport and metabolism	GTP 3',8-cyclase, mitochondrial isoform X1 [Glycine max]
Glyma.13G066100.Wm82.a2.v1	4.64022	10.0213	6.5253e-09	1.15339	up	[MDT]	Cell wall/membrane/envelope biogenesis;; Cell cycle control, cell division, chromosome partitioning;; Signal transduction mechanisms	Molecular Function: ATP binding (GO:0005524);; Cellular Component: integral component of membrane (GO:0016021);;	K08900|2.1e-160|hbr:110667265|K08900 mitochondrial chaperone BCS1 | (RefSeq) AAA-ATPase ASD, mitochondrial-like	--	[O]	Posttranslational modification, protein turnover, chaperones	Domain associated at C-terminal with AAA	AAA-ATPase ASD, mitochondrial OS=Arabidopsis thaliana OX=3702 GN=AATP1 PE=1 SV=1	O	Posttranslational modification, protein turnover, chaperones	AAA-ATPase ASD, mitochondrial [Glycine max]
Glyma.20G205100.Wm82.a2.v1	13.0206	5.30792	9.78116e-14	-1.25811	down	--	--	Molecular Function: ATP binding (GO:0005524);; Molecular Function: kinase activity (GO:0016301);;	--	--	--	--	Zeta toxin	Calmodulin calcium-dependent NAD kinase OS=Arabidopsis thaliana OX=3702 GN=NADKC PE=1 SV=1	S	Function unknown	uncharacterized protein LOC100796923 isoform X1 [Glycine max]
Glyma.12G106800.Wm82.a2.v1	7.58953	2.74791	1.20383e-06	-1.44678	down	--	--	Cellular Component: endoplasmic reticulum membrane (GO:0005789);; Cellular Component: plasma membrane (GO:0005886);; Biological Process: endoplasmic reticulum-plasma membrane tethering (GO:0061817);; Biological Process: endoplasmic reticulum membrane organization (GO:0090158);;	--	--	[U]	Intracellular trafficking, secretion, and vesicular transport	MSP (Major sperm protein) domain	Vesicle-associated protein 4-2 OS=Arabidopsis thaliana OX=3702 GN=PVA42 PE=1 SV=1	U	Intracellular trafficking, secretion, and vesicular transport	hypothetical protein GLYMA_12G106800 [Glycine max]
Glyma.11G189600.Wm82.a2.v1	6.4373	14.5611	9.35967e-20	1.21124	up	[N]	Cell motility	Cellular Component: Golgi apparatus (GO:0005794);; Cellular Component: integral component of membrane (GO:0016021);; Molecular Function: transferase activity, transferring glycosyl groups (GO:0016757);; Molecular Function: mannan synthase activity (GO:0051753);;	K13680|0.0e+00|gmx:100802752|K13680 beta-mannan synthase [EC:2.4.1.32] | (RefSeq) glucomannan 4-beta-mannosyltransferase 2	--	--	--	Glycosyl transferase family group 2	Glucomannan 4-beta-mannosyltransferase 2 OS=Arabidopsis thaliana OX=3702 GN=CSLA2 PE=1 SV=1	M	Cell wall/membrane/envelope biogenesis	glucomannan 4-beta-mannosyltransferase 2 [Glycine max]
Glyma.08G110700.Wm82.a2.v1	2.71999	6.02679	4.29832e-07	1.18241	up	[Q]	Secondary metabolites biosynthesis, transport and catabolism	Biological Process: biosynthetic process (GO:0009058);; Molecular Function: naringenin-chalcone synthase activity (GO:0016210);;	K00660|2.8e-224|gmx:100779649|K00660 chalcone synthase [EC:2.3.1.74] | (RefSeq) chalcone synthase CHS4	Flavonoid biosynthesis (ko00941);; Circadian rhythm - plant (ko04712)	--	--	Chalcone and stilbene synthases, N-terminal domain	Chalcone synthase 5 OS=Glycine max OX=3847 GN=CHS5 PE=3 SV=1	H	Coenzyme transport and metabolism	chalcone synthase 4a [Glycine max]
Glyma.01G181800.Wm82.a2.v1	8.87938	3.55812	3.89672e-18	-1.28188	down	[QV]	Secondary metabolites biosynthesis, transport and catabolism;; Defense mechanisms	Molecular Function: iron ion binding (GO:0005506);; Cellular Component: membrane (GO:0016020);; Cellular Component: integral component of membrane (GO:0016021);; Molecular Function: oxidoreductase activity, acting on paired donors, with incorporation or reduction of molecular oxygen, NAD(P)H as one donor, and incorporation of one atom of oxygen (GO:0016709);; Molecular Function: heme binding (GO:…	K23136|2.4e-165|ghi:107942681|K23136 fraxetin 5-hydroxylase [EC:1.14.14.164] | (RefSeq) cytochrome P450 82C4-like	--	[Q]	Secondary metabolites biosynthesis, transport and catabolism	Cytochrome P450	Cytochrome P450 82A3 OS=Glycine max OX=3847 GN=CYP82A3 PE=2 SV=1	Q	Secondary metabolites biosynthesis, transport and catabolism	cytochrome P450 CYP82D47 [Glycine max]
Glyma.15G031500.Wm82.a2.v1	2.53992	7.23591	8.54772e-06	1.50646	up	--	--	Cellular Component: cytoplasm (GO:0005737);; Biological Process: NADPH regeneration (GO:0006740);; Molecular Function: oxidoreductase activity (GO:0016491);;	--	--	[R]	General function prediction only	--	--	--	--	hypothetical protein GLYMA_15G031500 [Glycine max]
Glyma.13G158500.Wm82.a2.v1	0.459029	0.960092	0.001883	1.08142	up	--	--	Molecular Function: SNARE binding (GO:0000149);; Molecular Function: 1-phosphatidylinositol binding (GO:0005545);; Molecular Function: phosphatidylinositol-4,5-bisphosphate binding (GO:0005546);; Cellular Component: plasma membrane (GO:0005886);; Cellular Component: clathrin-coated pit (GO:0005905);; Biological Process: endocytosis (GO:0006897);; Biological Process: vesicle budding from membrane …	K20043|1.4e-71|pper:18782014|K20043 clathrin coat assembly protein AP180 | (RefSeq) clathrin coat assembly protein AP180	--	[TU]	Signal transduction mechanisms;; Intracellular trafficking, secretion, and vesicular transport	ANTH domain	Putative clathrin assembly protein At2g25430 OS=Arabidopsis thaliana OX=3702 GN=At2g25430 PE=1 SV=2	--	--	probable clathrin assembly protein At4g32285 [Glycine max]
Glyma.12G200600.Wm82.a2.v1	7.42319	1.28266	1.44388e-21	-2.48438	down	--	--	--	--	--	--	--	Wound-induced protein	--	S	Function unknown	hypothetical protein D0Y65_034956 [Glycine soja]
Glyma.02G136700.Wm82.a2.v1	10.2595	4.92207	9.81615e-10	-1.02604	down	--	--	Biological Process: pollen tube guidance (GO:0010183);; Molecular Function: mediator complex binding (GO:0036033);;	--	--	--	--	--	CCG-binding protein 1 OS=Arabidopsis thaliana OX=3702 GN=MEE14 PE=1 SV=1	--	--	uncharacterized protein LOC100305614 [Glycine max]
Glyma.11G074200.Wm82.a2.v1	1.25246	0.275443	3.5573e-08	-2.1065	down	--	--	--	K14552|2.9e-40|gmx:100807740|K14552 NET1-associated nuclear protein 1 (U3 small nucleolar RNA-associated protein 17) | (RefSeq) WD repeat-containing protein 75	Ribosome biogenesis in eukaryotes (ko03008)	[R]	General function prediction only	--	--	S	Function unknown	uncharacterized protein LOC114373801 [Glycine soja]
Glyma.20G161100.Wm82.a2.v1	9.97769	4.75928	1.81143e-13	-1.02701	down	--	--	Cellular Component: membrane (GO:0016020);; Cellular Component: integral component of membrane (GO:0016021);;	K13496|3.3e-61|atr:18422858|K13496 UDP-glucosyltransferase 73C [EC:2.4.1.-] | (RefSeq) scopoletin glucosyltransferase	Zeatin biosynthesis (ko00908)	--	--	--	--	--	--	uncharacterized protein LOC100797452 [Glycine max]
Glyma.16G026600.Wm82.a2.v1	0.518876	1.19534	7.15663e-05	1.24451	up	--	--	Cellular Component: Golgi apparatus (GO:0005794);; Cellular Component: integral component of membrane (GO:0016021);; Molecular Function: O-acetyltransferase activity (GO:0016413);;	K23877|2.6e-93|hbr:110647888|K23877 xyloglucan O-acetyltransferase | (RefSeq) protein ALTERED XYLOGLUCAN 4-like	--	--	--	GDSL/SGNH-like Acyl-Esterase family found in Pmr5 and Cas1p	Protein trichome birefringence-like 25 OS=Arabidopsis thaliana OX=3702 GN=TBL25 PE=2 SV=1	S	Function unknown	protein trichome birefringence-like 25 [Glycine max]
Glyma.13G077800.Wm82.a2.v1	7.46236	1.37189	1.05395e-39	-2.37173	down	--	--	Cellular Component: plasma membrane (GO:0005886);; Cellular Component: integral component of membrane (GO:0016021);; Molecular Function: transmembrane transporter activity (GO:0022857);;	K17500|7.0e-60|nto:104085001|K17500 integrin-linked kinase-associated serine/threonine phosphatase 2C [EC:3.1.3.16] | (RefSeq) WAT1-related protein At3g18200 isoform X1	--	--	--	EamA-like transporter family	WAT1-related protein At4g08290 OS=Arabidopsis thaliana OX=3702 GN=At4g08290 PE=2 SV=1	S	Function unknown	WAT1-related protein At4g08290 isoform X1 [Glycine max]
Glyma.17G026200.Wm82.a2.v1	1.7181	0.73071	0.000112978	-1.17068	down	[J]	Translation, ribosomal structure and biogenesis	Molecular Function: Ser-tRNA(Ala) hydrolase activity (GO:0002196);; Biological Process: regulation of translational fidelity (GO:0006450);;	--	--	[J]	Translation, ribosomal structure and biogenesis	--	--	S	Function unknown	hypothetical protein GLYMA_17G026200 [Glycine max]
Glyma.07G109600.Wm82.a2.v1	0.911836	2.43233	0.00019092	1.43682	up	--	--	Molecular Function: DNA binding (GO:0003677);; Cellular Component: nucleus (GO:0005634);; Cellular Component: host cell nucleus (GO:0042025);; Molecular Function: metal ion binding (GO:0046872);;	K20641|1.1e-11|cvr:CHLNCDRAFT_59250|K20641 Rho GTPase-activating protein 20 | (RefSeq) hypothetical protein	--	--	--	SBP domain	Squamosa promoter-binding-like protein 8 OS=Arabidopsis thaliana OX=3702 GN=SPL8 PE=1 SV=2	K	Transcription	squamosa promoter-binding-like protein 8 [Glycine soja]
Glyma.14G176600.Wm82.a2.v1	13.4196	31.7183	5.20287e-22	1.27602	up	[E]	Amino acid transport and metabolism	Molecular Function: 3-deoxy-7-phosphoheptulonate synthase activity (GO:0003849);; Biological Process: aromatic amino acid family biosynthetic process (GO:0009073);; Biological Process: chorismate biosynthetic process (GO:0009423);; Cellular Component: chloroplast (GO:0009507);;	K01626|1.7e-282|gmx:100797019|K01626 3-deoxy-7-phosphoheptulonate synthase [EC:2.5.1.54] | (RefSeq) phospho-2-dehydro-3-deoxyheptonate aldolase 1, chloroplastic	Phenylalanine, tyrosine and tryptophan biosynthesis (ko00400);; Biosynthesis of amino acids (ko01230)	--	--	Class-II DAHP synthetase family	Phospho-2-dehydro-3-deoxyheptonate aldolase 1, chloroplastic OS=Nicotiana tabacum OX=4097 GN=DHAPS-1 PE=2 SV=1	E	Amino acid transport and metabolism	hypothetical protein GLYMA_14G176600 [Glycine max]
Glyma.06G022500.Wm82.a2.v1	0.21942	0.524762	0.0224116	1.28316	up	[O]	Posttranslational modification, protein turnover, chaperones	Molecular Function: serine-type endopeptidase activity (GO:0004252);;	K15333|1.6e-77|nsy:104224633|K15333 tRNA guanosine-2'-O-methyltransferase [EC:2.1.1.34] | (RefSeq) uncharacterized protein LOC104224633	--	--	--	Subtilase family	CO(2)-response secreted protease OS=Arabidopsis thaliana OX=3702 GN=CRSP PE=2 SV=1	O	Posttranslational modification, protein turnover, chaperones	hypothetical protein GLYMA_06G022500 [Glycine max]
Glyma.11G144800.Wm82.a2.v1	1.12342	2.61534	2.3024e-12	1.27418	up	--		Molecular Function: transmembrane receptor protein serine/threonine kinase activity (GO:0004675);; Molecular Function: ATP binding (GO:0005524);; Cellular Component: plasma membrane (GO:0005886);; Biological Process: protein phosphorylation (GO:0006468);; Cellular Component: integral component of membrane (GO:0016021);;	K01180|4.7e-64|cmax:111487562|K01180 endo-1,3(4)-beta-glucanase [EC:3.2.1.6] | (RefSeq) uncharacterized protein LOC111487562	--	[T]	Signal transduction mechanisms	Protein kinase domain	Receptor-like serine/threonine-protein kinase NCRK OS=Arabidopsis thaliana OX=3702 GN=NCRK PE=1 SV=1	T	Signal transduction mechanisms	protein kinase family protein precursor [Glycine max]
Glyma.03G085000.Wm82.a2.v1	3.00456	6.16204	0.00112475	1.05907	up	[QV]	Secondary metabolites biosynthesis, transport and catabolism;; Defense mechanisms	Molecular Function: iron ion binding (GO:0005506);; Cellular Component: membrane (GO:0016020);; Cellular Component: integral component of membrane (GO:0016021);; Molecular Function: oxidoreductase activity, acting on paired donors, with incorporation or reduction of molecular oxygen, NAD(P)H as one donor, and incorporation of one atom of oxygen (GO:0016709);; Molecular Function: heme binding (GO:…	K17961|3.0e-253|gmx:100806378|K17961 trimethyltridecatetraene/dimethylnonatriene synthase [EC:1.14.14.58 1.14.14.59] | (RefSeq) cytochrome P450 CYP82D47	Diterpenoid biosynthesis (ko00904)	[Q]	Secondary metabolites biosynthesis, transport and catabolism	Cytochrome P450	Xanthotoxin 5-hydroxylase CYP82C4 OS=Arabidopsis thaliana OX=3702 GN=CYP82C4 PE=1 SV=1	Q	Secondary metabolites biosynthesis, transport and catabolism	hypothetical protein GLYMA_03G085000 [Glycine max]
Glyma.17G125900.Wm82.a2.v1	1.32834	0.622778	0.00591076	-1.02563	down	--	--	Biological Process: resolution of meiotic recombination intermediates (GO:0000712);; Biological Process: DNA repair (GO:0006281);; Biological Process: replication fork processing (GO:0031297);; Cellular Component: Fanconi anaemia nuclear complex (GO:0043240);; Biological Process: kinetochore assembly (GO:0051382);; Cellular Component: FANCM-MHF complex (GO:0071821);;	K15360|4.2e-50|gmx:100810847|K15360 centromere protein X | (RefSeq) protein MHF2 homolog	--	--	--	CENP-S associating Centromere protein X	Protein MHF2 homolog OS=Arabidopsis thaliana OX=3702 GN=MHF2 PE=3 SV=1	S	Function unknown	protein MHF2 homolog [Glycine max]
Glyma.13G329800.Wm82.a2.v1	7.08365	2.48093	1.0354e-08	-1.46558	down	--	--	--	--	--	--	--	--	--	--	--	unknown [Glycine max]
Glyma.12G054200.Wm82.a2.v1	1.10622	2.75734	2.31828e-05	1.33016	up	[G]	Carbohydrate transport and metabolism	Biological Process: carbohydrate metabolic process (GO:0005975);; Molecular Function: beta-glucosidase activity (GO:0008422);;	K01188|0.0e+00|gmx:100799731|K01188 beta-glucosidase [EC:3.2.1.21] | (RefSeq) cyanogenic beta-glucosidase	Cyanoamino acid metabolism (ko00460);; Starch and sucrose metabolism (ko00500);; Phenylpropanoid biosynthesis (ko00940)	[G]	Carbohydrate transport and metabolism	Glycosyl hydrolase family 1	Beta-glucosidase 12 OS=Oryza sativa subsp. indica OX=39946 GN=BGLU12 PE=3 SV=1	G	Carbohydrate transport and metabolism	cyanogenic beta-glucosidase [Glycine max]
Glyma.05G216400.Wm82.a2.v1	9.72256	26.629	5.83075e-20	1.48396	up	[G]	Carbohydrate transport and metabolism	Molecular Function: cellulase activity (GO:0008810);; Biological Process: cellulose catabolic process (GO:0030245);; Molecular Function: carbohydrate binding (GO:0030246);;	K01179|0.0e+00|gmx:732598|K01179 endoglucanase [EC:3.2.1.4] | (RefSeq) endoglucanase 6	Starch and sucrose metabolism (ko00500)	--	--	Glycosyl hydrolase family 9	Endoglucanase 6 OS=Arabidopsis thaliana OX=3702 GN=At1g64390 PE=2 SV=2	G	Carbohydrate transport and metabolism	endoglucanase 6 [Glycine max]
Glyma.03G260100.Wm82.a2.v1	0.907608	2.08972	0.000113545	1.2309	up	--	--	Cellular Component: integral component of membrane (GO:0016021);;	--	--	--	--	Putative AtpZ or ATP-synthase-associated	--	S	Function unknown	hypothetical protein GLYMA_03G260100 [Glycine max]
Glyma.08G285300.Wm82.a2.v1	0.15754	0.555625	0.000565673	1.79807	up	[G]	Carbohydrate transport and metabolism	Molecular Function: polygalacturonase activity (GO:0004650);; Cellular Component: extracellular region (GO:0005576);; Biological Process: carbohydrate metabolic process (GO:0005975);; Biological Process: cell wall organization (GO:0071555);;	K01213|2.3e-170|nau:109243727|K01213 galacturan 1,4-alpha-galacturonidase [EC:3.2.1.67] | (RefSeq) probable polygalacturonase At1g80170	Pentose and glucuronate interconversions (ko00040)	--	--	Glycosyl hydrolases family 28	Probable polygalacturonase At1g80170 OS=Arabidopsis thaliana OX=3702 GN=At1g80170 PE=1 SV=1	L	Replication, recombination and repair	hypothetical protein GLYMA_08G285300 [Glycine max]
Glyma.16G149600.Wm82.a2.v1	0.443588	1.26411	0.000388923	1.4845	up	--	--	--	--	--	--	--	Cotton fibre expressed protein	--	S	Function unknown	uncharacterized protein LOC100783425 [Glycine max]
Glyma.09G266700.Wm82.a2.v1	0.735305	1.55149	0.00290547	1.09602	up	--	--	Molecular Function: electron carrier activity (GO:0009055);; Cellular Component: anchored component of plasma membrane (GO:0046658);;	--	--	--	--	Plastocyanin-like domain	--	S	Function unknown	cucumber peeling cupredoxin [Glycine max]
Glyma.18G043200.Wm82.a2.v1	1.32342	3.30111	0.000444321	1.32443	up	--	--	Cellular Component: spindle (GO:0005819);; Cellular Component: microtubule (GO:0005874);; Biological Process: activation of protein kinase activity (GO:0032147);; Biological Process: regulation of mitotic spindle organization (GO:0060236);;	K16812|3.4e-08|atr:18448126|K16812 targeting protein for Xklp2 | (RefSeq) protein TPX2	--	--	--	Targeting protein for Xklp2 (TPX2) domain	--	S	Function unknown	uncharacterized protein LOC100306180 isoform X1 [Glycine max]
Glyma.03G030600.Wm82.a2.v1	2.42323	0.922989	2.10639e-05	-1.36459	down	[QV]	Secondary metabolites biosynthesis, transport and catabolism;; Defense mechanisms	Molecular Function: iron ion binding (GO:0005506);; Cellular Component: membrane (GO:0016020);; Cellular Component: integral component of membrane (GO:0016021);; Molecular Function: oxidoreductase activity, acting on paired donors, with incorporation or reduction of molecular oxygen, NAD(P)H as one donor, and incorporation of one atom of oxygen (GO:0016709);; Molecular Function: heme binding (GO:…	K20617|2.2e-197|lja:Lj3g3v1475790.2|K20617 cytochrome P450 family 71 subfamily A | (RefSeq) Lj3g3v1475790.2; -	--	[Q]	Secondary metabolites biosynthesis, transport and catabolism	Cytochrome P450	Cytochrome P450 83B1 OS=Arabidopsis thaliana OX=3702 GN=CYP83B1 PE=1 SV=1	Q	Secondary metabolites biosynthesis, transport and catabolism	cytochrome P450 71A1 [Glycine max]
Glyma.18G228600.Wm82.a2.v1	2.98355	0.888909	3.28437e-08	-1.71499	down	--	--	--	K03363|1.6e-07|mtr:MTR_7g055590|K03363 cell division cycle 20, cofactor of APC complex | (RefSeq) transducin family protein/WD-40 repeat protein	Ubiquitin mediated proteolysis (ko04120)	--	--	LysM domain	--	S	Function unknown	uncharacterized protein LOC100306578 precursor [Glycine max]
Glyma.13G003300.Wm82.a2.v1	8.78452	1.38231	8.66526e-16	-2.61062	down	--	--	Cellular Component: plasma membrane (GO:0005886);;	--	--	--	--	Cysteine-rich TM module stress tolerance	--	S	Function unknown	hypothetical protein GLYMA_13G003300 [Glycine max]
Glyma.14G088800.Wm82.a2.v1	1.87054	4.43534	1.72945e-09	1.27315	up	--	--	Cellular Component: mitochondrial outer membrane (GO:0005741);; Molecular Function: voltage-gated anion channel activity (GO:0008308);;	K15040|5.1e-151|gmx:100794992|K15040 voltage-dependent anion channel protein 2 | (RefSeq) mitochondrial outer membrane protein porin 2 isoform X4	--	[P]	Inorganic ion transport and metabolism	Eukaryotic porin	Mitochondrial outer membrane protein porin 2 OS=Arabidopsis thaliana OX=3702 GN=VDAC2 PE=1 SV=1	P	Inorganic ion transport and metabolism	mitochondrial outer membrane protein porin 2 isoform X4 [Glycine max]
Glyma.08G161500.Wm82.a2.v1	0.335011	0.855672	6.86425e-09	1.38438	up	--	--	Molecular Function: microfilament motor activity (GO:0000146);; Molecular Function: ATP binding (GO:0005524);; Cellular Component: cytoplasm (GO:0005737);; Biological Process: actin filament organization (GO:0007015);; Cellular Component: actin cytoskeleton (GO:0015629);; Cellular Component: myosin complex (GO:0016459);; Biological Process: vesicle transport along actin filament (GO:0030050);; Mo…	K10357|0.0e+00|gmx:100786418|K10357 myosin V | (RefSeq) myosin-12	--	[Z]	Cytoskeleton	Myosin head (motor domain)	Myosin-12 OS=Arabidopsis thaliana OX=3702 GN=XI-F PE=2 SV=1	Z	Cytoskeleton	myosin-12 [Glycine max]
Glyma.05G224900.Wm82.a2.v1	9.21836	4.45393	1.92537e-11	-1.0084	down	[G]	Carbohydrate transport and metabolism	Molecular Function: 6-phosphofructokinase activity (GO:0003872);; Molecular Function: ATP binding (GO:0005524);; Cellular Component: cytoplasm (GO:0005737);; Biological Process: fructose 6-phosphate metabolic process (GO:0006002);; Molecular Function: metal ion binding (GO:0046872);;	K00850|8.6e-276|gmx:100795344|K00850 6-phosphofructokinase 1 [EC:2.7.1.11] | (RefSeq) ATP-dependent 6-phosphofructokinase 7-like	Glycolysis / Gluconeogenesis (ko00010);; Pentose phosphate pathway (ko00030);; Fructose and mannose metabolism (ko00051);; Galactose metabolism (ko00052);; Carbon metabolism (ko01200);; Biosynthesis of amino acids (ko01230);; RNA degradation (ko03018)	[G]	Carbohydrate transport and metabolism	Phosphofructokinase	ATP-dependent 6-phosphofructokinase 7 OS=Arabidopsis thaliana OX=3702 GN=PFK7 PE=1 SV=1	G	Carbohydrate transport and metabolism	ATP-dependent 6-phosphofructokinase 7-like [Glycine max]
Glyma.03G113200.Wm82.a2.v1	16.7337	3.5126	7.82862e-27	-2.21	down	[IQR]	Lipid transport and metabolism;; Secondary metabolites biosynthesis, transport and catabolism;; General function prediction only	Molecular Function: momilactone-A synthase activity (GO:0102960);;	K13070|2.1e-77|dosa:Os04t0179200-01|K13070 momilactone-A synthase [EC:1.1.1.295] | (RefSeq) Os04g0179200, MAS, MOMILACTONE_A_SYNTHASE; Similar to Stem secoisolariciresinol dehydrogenase (Fragment).	Diterpenoid biosynthesis (ko00904)	[R]	General function prediction only	Enoyl-(Acyl carrier protein) reductase	Secoisolariciresinol dehydrogenase (Fragment) OS=Forsythia intermedia OX=55183 PE=1 SV=1	Q	Secondary metabolites biosynthesis, transport and catabolism	uncharacterized protein LOC100794412 [Glycine max]
Glyma.08G059300.Wm82.a2.v1	8.656	17.1722	9.21286e-18	1.02329	up	[C]	Energy production and conversion	Molecular Function: calcium ion binding (GO:0005509);; Molecular Function: oxidoreductase activity (GO:0016491);;	K17871|0.0e+00|gmx:100800518|K17871 NADH:ubiquinone reductase (non-electrogenic) [EC:1.6.5.9] | (RefSeq) external alternative NAD(P)H-ubiquinone oxidoreductase B2, mitochondrial	--	[C]	Energy production and conversion	Pyridine nucleotide-disulphide oxidoreductase	External alternative NAD(P)H-ubiquinone oxidoreductase B2, mitochondrial OS=Arabidopsis thaliana OX=3702 GN=NDB2 PE=1 SV=1	C	Energy production and conversion	external alternative NAD(P)H-ubiquinone oxidoreductase B2, mitochondrial [Glycine max]
Glyma.03G241000.Wm82.a2.v1	42.763	18.6614	9.63304e-25	-1.15731	down	[G]	Carbohydrate transport and metabolism	Molecular Function: sugar:proton symporter activity (GO:0005351);; Cellular Component: integral component of plasma membrane (GO:0005887);; Biological Process: glucose import (GO:0046323);;	K03444|1.7e-274|gmx:100786465|K03444 MFS transporter, SP family, ERD6-like sugar transporter | (RefSeq) sugar transporter ERD6-like 5 isoform X1	--	[R]	General function prediction only	Sugar (and other) transporter	Sugar transporter ERD6-like 5 OS=Arabidopsis thaliana OX=3702 GN=At1g54730 PE=2 SV=2	U	Intracellular trafficking, secretion, and vesicular transport	sugar transporter ERD6-like 5 isoform X1 [Glycine soja]
Glyma.02G085600.Wm82.a2.v1	1.7095	4.25718	1.88895e-14	1.34333	up	[O]	Posttranslational modification, protein turnover, chaperones	Molecular Function: ATP binding (GO:0005524);; Cellular Component: cytoplasm (GO:0005737);; Biological Process: response to unfolded protein (GO:0006986);; Molecular Function: ATPase activity (GO:0016887);; Molecular Function: heat shock protein binding (GO:0031072);; Biological Process: cellular response to unfolded protein (GO:0034620);; Biological Process: protein refolding (GO:0042026);; Mole…	K03283|0.0e+00|gmx:102667578|K03283 heat shock 70kDa protein 1/2/6/8 | (RefSeq) probable mediator of RNA polymerase II transcription subunit 37c	Spliceosome (ko03040);; Protein processing in endoplasmic reticulum (ko04141);; Endocytosis (ko04144)	[O]	Posttranslational modification, protein turnover, chaperones	Hsp70 protein	Heat shock 70 kDa protein 4 OS=Arabidopsis thaliana OX=3702 GN=HSP70-4 PE=1 SV=1	O	Posttranslational modification, protein turnover, chaperones	putative mediator of RNA polymerase II transcription subunit 37c isoform B, partial [Glycine soja]
Glyma.15G223600.Wm82.a2.v1	20.2917	4.06468	2.16242e-25	-2.27928	down	[I]	Lipid transport and metabolism	Molecular Function: lanosterol synthase activity (GO:0000250);; Cellular Component: lipid droplet (GO:0005811);; Biological Process: triterpenoid biosynthetic process (GO:0016104);; Molecular Function: beta-amyrin synthase activity (GO:0042300);;	K01853|1.9e-299|gmx:100784662|K01853 cycloartenol synthase [EC:5.4.99.8] | (RefSeq) cycloartenol synthase isoform X1	Steroid biosynthesis (ko00100)	[I]	Lipid transport and metabolism	Squalene-hopene cyclase C-terminal domain	Probable oxidosqualene cyclase OS=Cucurbita pepo OX=3663 GN=CPR PE=2 SV=1	I	Lipid transport and metabolism	hypothetical protein GLYMA_15G223600 [Glycine max]
Glyma.19G102400.Wm82.a2.v1	33.5851	6.0979	2.54571e-37	-2.42783	down	--	--	Cellular Component: chloroplast (GO:0009507);;	K12198|7.6e-23|sita:101765827|K12198 charged multivesicular body protein 5 | (RefSeq) vacuolar protein sorting-associated protein 60.1	Endocytosis (ko04144)	--	--	Light regulated protein Lir1	Light-regulated protein 1, chloroplastic OS=Arabidopsis thaliana OX=3702 GN=LIR1 PE=1 SV=1	S	Function unknown	light-regulated protein-like [Glycine max]
Glyma.12G093100.Wm82.a2.v1	73.2603	33.3347	0.00177366	-1.087	down	--	--	Cellular Component: P-body (GO:0000932);; Molecular Function: nucleic acid binding (GO:0003676);; Molecular Function: poly(A)-specific ribonuclease activity (GO:0004535);; Biological Process: negative regulation of translation (GO:0017148);; Cellular Component: CCR4-NOT core complex (GO:0030015);; Biological Process: exonucleolytic nuclear-transcribed mRNA catabolic process involved in deadenylat…	K12581|8.4e-162|gmx:100811298|K12581 CCR4-NOT transcription complex subunit 7/8 | (RefSeq) probable CCR4-associated factor 1 homolog 11	RNA degradation (ko03018)	[A]	RNA processing and modification	CAF1 family ribonuclease	Probable CCR4-associated factor 1 homolog 9 OS=Arabidopsis thaliana OX=3702 GN=CAF1-9 PE=2 SV=1	A	RNA processing and modification	probable CCR4-associated factor 1 homolog 11 [Glycine max]
Glyma.12G063900.Wm82.a2.v1	0.138645	1.171	6.78854e-11	2.97075	up	--	--	Molecular Function: DNA binding (GO:0003677);; Cellular Component: nucleus (GO:0005634);;	K14292|1.7e-20|cann:107850838|K14292 trimethylguanosine synthase [EC:2.1.1.-] | (RefSeq) uncharacterized LOC107850838	RNA transport (ko03013)	--	--	Homeodomain	WUSCHEL-related homeobox 2 OS=Arabidopsis thaliana OX=3702 GN=WOX2 PE=2 SV=1	K	Transcription	WUSCHEL-related homeobox 2 [Glycine max]
Glyma.04G088200.Wm82.a2.v1	5.64562	2.27267	9.57044e-08	-1.28178	down	--	--	Biological Process: amino acid transmembrane transport (GO:0003333);; Cellular Component: plasma membrane (GO:0005886);; Molecular Function: amino acid transmembrane transporter activity (GO:0015171);; Cellular Component: integral component of membrane (GO:0016021);;	K14209|1.2e-11|cmax:111478243|K14209 solute carrier family 36 (proton-coupled amino acid transporter) | (RefSeq) amino acid transporter ANT1 isoform X1	--	[E]	Amino acid transport and metabolism	Transmembrane amino acid transporter protein	Amino acid permease 6 OS=Arabidopsis thaliana OX=3702 GN=AAP6 PE=1 SV=1	E	Amino acid transport and metabolism	amino acid permease 6-like [Glycine soja]
Glyma.18G006000.Wm82.a2.v1	0.471264	1.01082	0.00305883	1.12422	up	--	--	Cellular Component: Golgi apparatus (GO:0005794);; Biological Process: plant-type secondary cell wall biogenesis (GO:0009834);; Cellular Component: integral component of membrane (GO:0016021);; Biological Process: xylan metabolic process (GO:0045491);; Biological Process: xylan biosynthetic process (GO:0045492);;	K18801|1.7e-57|ath:AT1G71690|K18801 glucuronoxylan 4-O-methyltransferase [EC:2.1.1.112] | (RefSeq) glucuronoxylan 4-O-methyltransferase-like protein (DUF579)	--	--	--	Polysaccharide biosynthesis	Probable methyltransferase At1g27930 OS=Arabidopsis thaliana OX=3702 GN=At1g27930 PE=1 SV=1	S	Function unknown	probable methyltransferase At1g27930 [Glycine max]
Glyma.11G057600.Wm82.a2.v1	0.345977	0.991641	3.14936e-06	1.59073	up	--	--	--	K14506|3.5e-14|nnu:109115461|K14506 jasmonic acid-amino synthetase [EC:6.3.2.52] | (RefSeq) uncharacterized LOC109115461	Plant hormone signal transduction (ko04075)	--	--	Protein of unknown function, DUF547	--	S	Function unknown	hypothetical protein GLYMA_11G057600 [Glycine max]
Glyma.02G011500.Wm82.a2.v1	3.14055	6.45077	0.0033824	1.05107	up	--	--	Molecular Function: pectinesterase activity (GO:0030599);; Molecular Function: pectinesterase inhibitor activity (GO:0046910);;	--	--	--	--	Plant invertase/pectin methylesterase inhibitor	--	S	Function unknown	uncharacterized protein LOC100793343 [Glycine max]
Glyma.02G004800.Wm82.a2.v1	3.15202	0.589276	6.94921e-12	-2.32817	down	--	--	--	--	--	--	--	--	--	--	--	uncharacterized protein LOC100802013 [Glycine max]
Glyma.13G370100.Wm82.a2.v1	6.32329	14.3564	1.54881e-06	1.22801	up	--	--	Molecular Function: transcription factor activity, sequence-specific DNA binding (GO:0003700);; Cellular Component: nucleus (GO:0005634);; Molecular Function: sequence-specific DNA binding (GO:0043565);;	K18834|5.7e-18|fve:101291408|K18834 WRKY transcription factor 1 | (RefSeq) WRKY transcription factor 1	Plant-pathogen interaction (ko04626)	--	--	WRKY DNA -binding domain	Probable WRKY transcription factor 40 OS=Arabidopsis thaliana OX=3702 GN=WRKY40 PE=1 SV=1	K	Transcription	probable WRKY transcription factor 40 [Glycine max]
Glyma.11G142900.Wm82.a2.v1	21.6764	10.3912	5.17364e-08	-1.01418	down	--	--	Cellular Component: nucleus (GO:0005634);; Biological Process: regulation of transcription, DNA-templated (GO:0006355);; Molecular Function: sequence-specific DNA binding (GO:0043565);;	K09422|7.3e-155|gmx:100776886|K09422 transcription factor MYB, plant | (RefSeq) transcription factor MYB59	--	[K]	Transcription	Myb-like DNA-binding domain	Transcription factor MYB48 OS=Arabidopsis thaliana OX=3702 GN=MYB48 PE=2 SV=1	--	--	Transcription factor MYB59 [Glycine soja]
Glyma.12G132500.Wm82.a2.v1	20.0374	4.61906	1.11844e-40	-2.07157	down	--	--	Molecular Function: UDP-glycosyltransferase activity (GO:0008194);; Cellular Component: intracellular membrane-bounded organelle (GO:0043231);;	K22794|1.7e-268|gmx:100820538|K22794 flavonol-3-O-glucoside/galactoside glucosyltransferase [EC:2.4.1.239 2.4.1.-] | (RefSeq) UDP-glycosyltransferase 79B30-like	Flavone and flavonol biosynthesis (ko00944)	[GC]	Carbohydrate transport and metabolism;; Energy production and conversion	UDP-glucoronosyl and UDP-glucosyl transferase	Cyanidin 3-O-galactoside 2''-O-xylosyltransferase FGGT1 OS=Actinidia chinensis var. chinensis OX=1590841 GN=F3GGT1 PE=1 SV=2	--	--	UDP-glycosyltransferase 79B30-like [Glycine max]
Glyma.11G031200.Wm82.a2.v1	1.70942	4.04108	1.82019e-06	1.24698	up	[F]	Nucleotide transport and metabolism	Molecular Function: adenine phosphoribosyltransferase activity (GO:0003999);; Cellular Component: cytosol (GO:0005829);; Biological Process: adenine salvage (GO:0006168);; Biological Process: nucleoside metabolic process (GO:0009116);;	K00759|2.4e-101|gmx:100306411|K00759 adenine phosphoribosyltransferase [EC:2.4.2.7] | (RefSeq) adenine phosphoribosyl transferase	Purine metabolism (ko00230)	[F]	Nucleotide transport and metabolism	Phosphoribosyl transferase domain	Adenine phosphoribosyltransferase 3 OS=Arabidopsis thaliana OX=3702 GN=APT3 PE=1 SV=1	F	Nucleotide transport and metabolism	adenine phosphoribosyl transferase [Glycine max]
Glyma.02G228600.Wm82.a2.v1	0.748619	2.01444	4.40814e-07	1.4368	up	--	--	Biological Process: chloroplast organization (GO:0009658);; Cellular Component: chloroplast outer membrane (GO:0009707);;	--	--	--	--	--	Protein CHUP1, chloroplastic OS=Arabidopsis thaliana OX=3702 GN=CHUP1 PE=1 SV=1	S	Function unknown	protein CHUP1, chloroplastic isoform X1 [Glycine max]
Glyma.06G003500.Wm82.a2.v1	0.845922	2.51015	4.37724e-08	1.58213	up	--	--	Molecular Function: ubiquitin-protein transferase activity (GO:0004842);;	K19042|1.5e-161|gmx:100815248|K19042 E3 ubiquitin-protein ligase BOI and related proteins [EC:2.3.2.27] | (RefSeq) probable BOI-related E3 ubiquitin-protein ligase 3	--	[O]	Posttranslational modification, protein turnover, chaperones	--	--	O	Posttranslational modification, protein turnover, chaperones	probable BOI-related E3 ubiquitin-protein ligase 3 [Glycine max]
Glyma.10G232600.Wm82.a2.v1	4.90808	2.12421	1.84392e-13	-1.1884	down	[P]	Inorganic ion transport and metabolism	Molecular Function: arsenite transmembrane transporter activity (GO:0015105);; Cellular Component: integral component of membrane (GO:0016021);;	--	--	[P]	Inorganic ion transport and metabolism	Citrate transporter	Silicon efflux transporter LSI2 OS=Oryza sativa subsp. japonica OX=39947 GN=LSI2 PE=1 SV=1	P	Inorganic ion transport and metabolism	silicon efflux transporter LSI2 [Glycine max]
Glyma.02G145300.Wm82.a2.v1	20.108	8.07274	2.5126e-15	-1.28024	down	[I]	Lipid transport and metabolism	Molecular Function: methylcrotonoyl-CoA carboxylase activity (GO:0004485);; Molecular Function: ATP binding (GO:0005524);; Cellular Component: mitochondrion (GO:0005739);; Molecular Function: CoA carboxylase activity (GO:0016421);; Molecular Function: metal ion binding (GO:0046872);;	K01968|0.0e+00|gmx:548094|K01968 3-methylcrotonyl-CoA carboxylase alpha subunit [EC:6.4.1.4] | (RefSeq) MCCA; methylcrotonoyl-CoA carboxylase subunit alpha, mitochondrial	Valine, leucine and isoleucine degradation (ko00280)	[IE]	Lipid transport and metabolism;; Amino acid transport and metabolism	Carbamoyl-phosphate synthase L chain, ATP binding domain	Methylcrotonoyl-CoA carboxylase subunit alpha, mitochondrial OS=Glycine max OX=3847 GN=MCCA PE=1 SV=2	C	Energy production and conversion	hypothetical protein GLYMA_02G145300 [Glycine max]
Glyma.04G157800.Wm82.a2.v1	0.0837903	0.863479	1.06987e-13	3.22747	up	--	--	--	K21867|3.3e-10|lang:109360892|K21867 potassium channel | (RefSeq) potassium channel SKOR	--	[PT]	Inorganic ion transport and metabolism;; Signal transduction mechanisms	--	Potassium channel SKOR OS=Arabidopsis thaliana OX=3702 GN=SKOR PE=1 SV=1	O	Posttranslational modification, protein turnover, chaperones	uncharacterized protein LOC100806110 [Glycine max]
Glyma.12G141900.Wm82.a2.v1	1.20734	2.79041	0.000388923	1.22326	up	[C]	Energy production and conversion	Molecular Function: NAD(P)H dehydrogenase (quinone) activity (GO:0003955);; Molecular Function: FMN binding (GO:0010181);; Biological Process: oxidation-reduction process (GO:0055114);;	K03809|1.7e-111|gmx:100793045|K03809 NAD(P)H dehydrogenase (quinone) [EC:1.6.5.2] | (RefSeq) NAD(P)H dehydrogenase (quinone) FQR1	Ubiquinone and other terpenoid-quinone biosynthesis (ko00130)	[R]	General function prediction only	NADPH-dependent FMN reductase	NAD(P)H dehydrogenase (quinone) FQR1 OS=Arabidopsis thaliana OX=3702 GN=FQR1 PE=1 SV=1	S	Function unknown	NAD(P)H dehydrogenase (quinone) FQR1 [Glycine max]
Glyma.08G222500.Wm82.a2.v1	0.331385	0.730022	0.00406217	1.15567	up	--	--	Cellular Component: exocyst (GO:0000145);; Biological Process: exocytosis (GO:0006887);; Biological Process: protein transport (GO:0015031);;	K07195|0.0e+00|gmx:100777662|K07195 exocyst complex component 7 | (RefSeq) exocyst complex component EXO70A1	--	[U]	Intracellular trafficking, secretion, and vesicular transport	Exo70 exocyst complex subunit	Exocyst complex component EXO70B2 OS=Arabidopsis thaliana OX=3702 GN=EXO70B2 PE=1 SV=1	U	Intracellular trafficking, secretion, and vesicular transport	hypothetical protein GLYMA_08G222500 [Glycine max]
Glyma.16G103900.Wm82.a2.v1	24.7722	49.6749	3.18917e-10	1.03637	up	[R]	General function prediction only	Molecular Function: oxidoreductase activity (GO:0016491);;	K21568|1.5e-175|gmx:100786578|K21568 pinoresinol/lariciresinol reductase [EC:1.23.1.1 1.23.1.2 1.23.1.3 1.23.1.4] | (RefSeq) uncharacterized protein LOC100786578	Biosynthesis of various secondary metabolites - part 2 (ko00998)	--	--	NmrA-like family	Isoflavone reductase homolog OS=Lupinus albus OX=3870 PE=2 SV=1	S	Function unknown	pinoresinol reductase 1-like [Glycine max]
Glyma.12G233700.Wm82.a2.v1	65.1678	21.2322	1.20931e-17	-1.58177	down	--	--	Cellular Component: integral component of membrane (GO:0016021);;	K17550|8.3e-21|hbr:110653050|K17550 protein phosphatase 1 regulatory subunit 7 | (RefSeq) leucine-rich repeat receptor-like serine/threonine-protein kinase BAM2	--	[R]	General function prediction only	Leucine rich repeat	Receptor-like protein 13 OS=Arabidopsis thaliana OX=3702 GN=RLP13 PE=3 SV=1	A	RNA processing and modification	receptor-like protein 56 isoform X2 [Glycine max]
Glyma.08G161700.Wm82.a2.v1	1.34861	3.08927	0.00118649	1.20675	up	--	--	Biological Process: lipid transport (GO:0006869);; Molecular Function: lipid binding (GO:0008289);;	--	--	--	--	Protease inhibitor/seed storage/LTP family	Non-specific lipid-transfer protein 8 OS=Arabidopsis thaliana OX=3702 GN=LTP8 PE=3 SV=1	G	Carbohydrate transport and metabolism	non-specific lipid-transfer protein 8-like [Glycine soja]
Glycine_max_newGene_6524	1.46673	0.716914	0.0203176	-1.0097	down	[R]	General function prediction only	Molecular Function: nucleotide binding (GO:0000166);; Molecular Function: molecular_function (GO:0003674);; Molecular Function: catalytic activity (GO:0003824);; Molecular Function: aldo-keto reductase (NADP) activity (GO:0004033);; Molecular Function: binding (GO:0005488);; Cellular Component: cellular_component (GO:0005575);; Cellular Component: intracellular (GO:0005622);; Cellular Component: …	K05275|3.2e-34|gmx:100791681|K05275 pyridoxine 4-dehydrogenase [EC:1.1.1.65] | (RefSeq) pyridoxal reductase, chloroplastic	Vitamin B6 metabolism (ko00750)	[C]	Energy production and conversion	--	Pyridoxal reductase, chloroplastic OS=Arabidopsis thaliana OX=3702 GN=PLR1 PE=1 SV=1	C	Energy production and conversion	Putative oxidoreductase, chloroplastic [Glycine soja]
Glyma.13G036600.Wm82.a2.v1	2.95824	0.723508	7.9086e-08	-1.96291	down	--	--	Cellular Component: ubiquitin ligase complex (GO:0000151);; Molecular Function: molecular_function (GO:0003674);; Molecular Function: catalytic activity (GO:0003824);; Molecular Function: ubiquitin-protein transferase activity (GO:0004842);; Molecular Function: protein binding (GO:0005515);; Cellular Component: cellular_component (GO:0005575);; Cellular Component: intracellular (GO:0005622);; Cel…	K03875|2.3e-130|gmx:100788845|K03875 F-box and leucine-rich repeat protein 1 (S-phase kinase-associated protein 2) | (RefSeq) F-box protein SKP2B	Ubiquitin mediated proteolysis (ko04120)	[R]	General function prediction only	Leucine Rich repeat	F-box protein SKP2B OS=Arabidopsis thaliana OX=3702 GN=SKP2B PE=1 SV=1	S	Function unknown	F-box protein SKP2B [Glycine max]
Glyma.06G293400.Wm82.a2.v1	59.3696	26.747	1.2885e-20	-1.10455	down	--	--	Biological Process: ubiquitin-dependent protein catabolic process (GO:0006511);; Molecular Function: ubiquitin-like protein conjugating enzyme binding (GO:0044390);; Molecular Function: metal ion binding (GO:0046872);; Molecular Function: ubiquitin protein ligase activity (GO:0061630);; Biological Process: ER-associated misfolded protein catabolic process (GO:0071712);;	K10666|4.6e-140|gmx:100786373|K10666 E3 ubiquitin-protein ligase RNF5 [EC:2.3.2.27] | (RefSeq) uncharacterized protein LOC100786373	Protein processing in endoplasmic reticulum (ko04141)	[O]	Posttranslational modification, protein turnover, chaperones	Zinc finger, C3HC4 type (RING finger)	E3 ubiquitin-protein ligase RMA1H1 OS=Capsicum annuum OX=4072 GN=RMA1H1 PE=1 SV=1	O	Posttranslational modification, protein turnover, chaperones	uncharacterized protein LOC100786373 [Glycine max]
Glyma.15G034400.Wm82.a2.v1	5.73221	13.074	1.41199e-14	1.2279	up	[C]	Energy production and conversion	Molecular Function: 3-chloroallyl aldehyde dehydrogenase activity (GO:0004028);; Biological Process: cellular aldehyde metabolic process (GO:0006081);;	K00128|1.1e-281|gmx:100819197|K00128 aldehyde dehydrogenase (NAD+) [EC:1.2.1.3] | (RefSeq) aldehyde dehydrogenase family 3 member F1	Glycolysis / Gluconeogenesis (ko00010);; Ascorbate and aldarate metabolism (ko00053);; Fatty acid degradation (ko00071);; Valine, leucine and isoleucine degradation (ko00280);; Lysine degradation (ko00310);; Arginine and proline metabolism (ko00330);; Histidine metabolism (ko00340);; Tryptophan metabolism (ko00380);; beta-Alanine metabolism (ko00410);; Glycerolipid metabolism (ko00561);; Pyruvate…	[C]	Energy production and conversion	Aldehyde dehydrogenase family	Aldehyde dehydrogenase family 3 member F1 OS=Arabidopsis thaliana OX=3702 GN=ALDH3F1 PE=2 SV=2	C	Energy production and conversion	aldehyde dehydrogenase family 3 member J4 [Glycine max]
Glyma.12G023100.Wm82.a2.v1	0.780398	4.03439	7.86561e-18	2.38036	up	--	--	Biological Process: amino acid transmembrane transport (GO:0003333);; Cellular Component: plasma membrane (GO:0005886);; Molecular Function: amino acid transmembrane transporter activity (GO:0015171);; Cellular Component: integral component of membrane (GO:0016021);;	K19476|1.0e-48|cic:CICLE_v10026997mg|K19476 vacuolar protein sorting-associated protein IST1 | (RefSeq) hypothetical protein	Endocytosis (ko04144)	[E]	Amino acid transport and metabolism	Transmembrane amino acid transporter protein	Lysine histidine transporter-like 8 OS=Arabidopsis thaliana OX=3702 GN=AATL1 PE=1 SV=1	E	Amino acid transport and metabolism	lysine histidine transporter-like 8 [Glycine max]
Glyma.04G026400.Wm82.a2.v1	10.5138	54.0575	2.51764e-41	2.40384	up	[S]	Function unknown	--	--	--	--	--	Glyoxal oxidase N-terminus	Aldehyde oxidase GLOX1 OS=Arabidopsis thaliana OX=3702 GN=GLOX1 PE=2 SV=1	S	Function unknown	aldehyde oxidase GLOX1 [Glycine max]
Glyma.13G298700.Wm82.a2.v1	9.2254	2.03111	1.04072e-51	-2.1503	down	--	--	Biological Process: protein localization (GO:0008104);; Biological Process: protein transport (GO:0015031);;	K19476|0.0e+00|gmx:100810417|K19476 vacuolar protein sorting-associated protein IST1 | (RefSeq) uncharacterized protein LOC100810417 isoform X2	Endocytosis (ko04144)	[Z]	Cytoskeleton	Regulator of Vps4 activity in the MVB pathway	--	Z	Cytoskeleton	uncharacterized protein LOC100810417 isoform X2 [Glycine max]
Glyma.02G057400.Wm82.a2.v1	3.34525	6.52517	3.38045e-07	1.00368	up	[C]	Energy production and conversion	Molecular Function: succinate dehydrogenase activity (GO:0000104);; Cellular Component: mitochondrial respiratory chain complex II, succinate dehydrogenase complex (ubiquinone) (GO:0005749);; Biological Process: tricarboxylic acid cycle (GO:0006099);; Biological Process: mitochondrial electron transport, succinate to ubiquinone (GO:0006121);; Molecular Function: succinate dehydrogenase (ubiquinon…	K00234|0.0e+00|gmx:100802169|K00234 succinate dehydrogenase (ubiquinone) flavoprotein subunit [EC:1.3.5.1] | (RefSeq) succinate dehydrogenase [ubiquinone] flavoprotein subunit 1, mitochondrial	Citrate cycle (TCA cycle) (ko00020);; Oxidative phosphorylation (ko00190);; Carbon metabolism (ko01200)	[C]	Energy production and conversion	FAD binding domain	Succinate dehydrogenase [ubiquinone] flavoprotein subunit 1, mitochondrial OS=Arabidopsis thaliana OX=3702 GN=SDH1-1 PE=1 SV=1	C	Energy production and conversion	succinate dehydrogenase [ubiquinone] flavoprotein subunit 1, mitochondrial [Glycine max]
Glyma.16G165500.Wm82.a2.v1	38.7838	179.312	1.07876e-22	2.23844	up	--	--	Cellular Component: photosystem I (GO:0009522);; Cellular Component: photosystem II (GO:0009523);; Cellular Component: chloroplast thylakoid membrane (GO:0009535);; Biological Process: photosynthesis, light harvesting (GO:0009765);; Cellular Component: integral component of membrane (GO:0016021);; Molecular Function: chlorophyll binding (GO:0016168);; Biological Process: protein-chromophore linka…	K08912|8.2e-151|gmx:547819|K08912 light-harvesting complex II chlorophyll a/b binding protein 1 | (RefSeq) chlorophyll a-b binding protein, chloroplastic	Photosynthesis - antenna proteins (ko00196)	--	--	Chlorophyll A-B binding protein	Chlorophyll a-b binding protein 3, chloroplastic OS=Glycine max OX=3847 GN=CAB3 PE=3 SV=1	C	Energy production and conversion	chlorophyll a-b binding protein, chloroplastic [Glycine max]
Glyma.13G284700.Wm82.a2.v1	1.44423	2.98696	0.0110133	1.07169	up	--	--	Cellular Component: integral component of membrane (GO:0016021);;	--	--	--	--	--	--	--	--	uncharacterized protein LOC100779229 [Glycine max]
Glyma.12G178100.Wm82.a2.v1	0.240184	0.593413	0.000389502	1.28859	up	--	--	Biological Process: protein glycosylation (GO:0006486);; Biological Process: glucuronoxylan biosynthetic process (GO:0010417);; Molecular Function: transferase activity, transferring glycosyl groups (GO:0016757);;	K20889|3.2e-267|gmx:100797984|K20889 probable glucuronoxylan glucuronosyltransferase IRX7 [EC:2.4.1.-] | (RefSeq) probable glucuronoxylan glucuronosyltransferase IRX7	--	[GMW]	Carbohydrate transport and metabolism;; Cell wall/membrane/envelope biogenesis;; Extracellular structures	Exostosin family	Probable glucuronoxylan glucuronosyltransferase IRX7 OS=Arabidopsis thaliana OX=3702 GN=IRX7 PE=2 SV=1	--	--	probable glucuronoxylan glucuronosyltransferase IRX7 [Glycine max]
Glyma.05G002600.Wm82.a2.v1	5.44861	2.61871	6.60894e-07	-1.00806	down	[T]	Signal transduction mechanisms	Molecular Function: protein kinase activity (GO:0004672);; Molecular Function: protein serine/threonine kinase activity (GO:0004674);; Molecular Function: ATP binding (GO:0005524);; Cellular Component: cytoplasm (GO:0005737);; Biological Process: signal transduction (GO:0007165);;	K04427|3.1e-73|lang:109331017|K04427 mitogen-activated protein kinase kinase kinase 7 [EC:2.7.11.25] | (RefSeq) serine/threonine-protein kinase HT1-like	--	[T]	Signal transduction mechanisms	Protein tyrosine and serine/threonine kinase	Serine/threonine/tyrosine-protein kinase HT1 OS=Arabidopsis thaliana OX=3702 GN=HT1 PE=1 SV=1	T	Signal transduction mechanisms	serine/threonine-protein kinase HT1 [Glycine max]
Glyma.05G080800.Wm82.a2.v1	0.43068	0.942005	0.00597575	1.13739	up	[O]	Posttranslational modification, protein turnover, chaperones	Biological Process: protein peptidyl-prolyl isomerization (GO:0000413);; Molecular Function: peptidyl-prolyl cis-trans isomerase activity (GO:0003755);; Cellular Component: cytoplasm (GO:0005737);; Biological Process: protein folding (GO:0006457);; Molecular Function: cyclosporin A binding (GO:0016018);;	K05864|4.8e-210|gmx:100803839|K05864 peptidyl-prolyl isomerase D [EC:5.2.1.8] | (RefSeq) GMCYP8; peptidyl-prolyl cis-trans isomerase GmCYP8	--	[O]	Posttranslational modification, protein turnover, chaperones	Cyclophilin type peptidyl-prolyl cis-trans isomerase/CLD	Peptidyl-prolyl cis-trans isomerase CYP40 OS=Arabidopsis thaliana OX=3702 GN=CYP40 PE=2 SV=1	O	Posttranslational modification, protein turnover, chaperones	peptidyl-prolyl cis-trans isomerase CYP8 [Glycine max]
Glyma.13G092500.Wm82.a2.v1	14.2838	5.84609	6.11668e-16	-1.25264	down	[G]	Carbohydrate transport and metabolism	Molecular Function: catalytic activity (GO:0003824);; Cellular Component: spliceosomal complex (GO:0005681);; Cellular Component: cytoplasm (GO:0005737);; Biological Process: trehalose biosynthetic process (GO:0005992);; Biological Process: regulation of gene expression (GO:0010468);; Biological Process: mRNA cis splicing, via spliceosome (GO:0045292);;	K16055|0.0e+00|gmx:100789206|K16055 trehalose 6-phosphate synthase/phosphatase [EC:2.4.1.15 3.1.3.12] | (RefSeq) probable alpha,alpha-trehalose-phosphate synthase [UDP-forming] 11	Starch and sucrose metabolism (ko00500)	[G]	Carbohydrate transport and metabolism	Glycosyltransferase family 20	Probable alpha,alpha-trehalose-phosphate synthase [UDP-forming] 11 OS=Arabidopsis thaliana OX=3702 GN=TPS11 PE=2 SV=1	G	Carbohydrate transport and metabolism	probable alpha,alpha-trehalose-phosphate synthase [UDP-forming] 11 [Glycine max]
Glyma.13G217800.Wm82.a2.v1	0.435121	1.39561	1.91675e-14	1.71034	up	[T]	Signal transduction mechanisms	Molecular Function: voltage-gated potassium channel activity (GO:0005249);; Cellular Component: integral component of membrane (GO:0016021);; Biological Process: regulation of ion transmembrane transport (GO:0034765);;	K21867|0.0e+00|gmx:100783528|K21867 potassium channel | (RefSeq) potassium channel KAT3	--	[PT]	Inorganic ion transport and metabolism;; Signal transduction mechanisms	Ion transport protein	Potassium channel KAT1 OS=Arabidopsis thaliana OX=3702 GN=KAT1 PE=1 SV=2	P	Inorganic ion transport and metabolism	potassium channel KAT3 [Glycine max]
Glyma.02G239800.Wm82.a2.v1	16.8771	5.15054	2.84305e-20	-1.67206	down	--	--	Biological Process: response to oxidative stress (GO:0006979);; Cellular Component: nuclear speck (GO:0016607);; Biological Process: response to cadmium ion (GO:0046686);;	--	--	[K]	Transcription	--	--	K	Transcription	uncharacterized protein LOC100782016 [Glycine max]
Glyma.14G177600.Wm82.a2.v1	4.14637	8.27314	0.000117914	1.03437	up	--	--	Molecular Function: electron carrier activity (GO:0009055);; Cellular Component: integral component of membrane (GO:0016021);;	--	--	--	--	Plastocyanin-like domain	Blue copper protein OS=Pisum sativum OX=3888 PE=2 SV=1	S	Function unknown	putative phytocyanin precursor [Glycine max]
Glyma.13G174900.Wm82.a2.v1	0.699772	1.62854	6.43014e-07	1.2483	up	[M]	Cell wall/membrane/envelope biogenesis	Molecular Function: protein serine/threonine kinase activity (GO:0004674);; Molecular Function: ATP binding (GO:0005524);; Cellular Component: plasma membrane (GO:0005886);; Cellular Component: integral component of membrane (GO:0016021);;	K00924|3.3e-224|lang:109334483|K00924 kinase [EC:2.7.1.-] | (RefSeq) receptor-like protein kinase HSL1	--	--	--	Protein kinase domain	Receptor-like protein kinase HSL1 OS=Arabidopsis thaliana OX=3702 GN=HSL1 PE=2 SV=1	T	Signal transduction mechanisms	hypothetical protein GLYMA_13G174900 [Glycine max]
Glyma.14G085200.Wm82.a2.v1	1.36403	2.9256	5.33624e-09	1.12857	up	--	--	Molecular Function: microtubule motor activity (GO:0003777);; Molecular Function: ATP binding (GO:0005524);; Biological Process: microtubule-based movement (GO:0007018);; Molecular Function: microtubule binding (GO:0008017);;	K18806|3.3e-86|mis:MICPUN_63076|K18806 kinesin family member 7 | (RefSeq) predicted protein	--	[Z]	Cytoskeleton	Kinesin motor domain	Kinesin-like protein KIN-4A OS=Gossypium hirsutum OX=3635 GN=KIN4A PE=2 SV=1	Z	Cytoskeleton	kinesin-like protein KIN-4A isoform X1 [Glycine max]
Glyma.05G188000.Wm82.a2.v1	3.11885	6.36287	1.03059e-12	1.06424	up	--	--	--	--	--	--	--	--	--	--	--	uncharacterized protein LOC100776396 [Glycine max]
Glyma.10G159700.Wm82.a2.v1	62.638	28.5926	5.55459e-19	-1.09334	down	[E]	Amino acid transport and metabolism	Molecular Function: cysteine synthase activity (GO:0004124);; Cellular Component: cytoplasm (GO:0005737);; Biological Process: cysteine biosynthetic process from serine (GO:0006535);; Molecular Function: pyridoxal phosphate binding (GO:0030170);;	K01738|1.3e-177|gmx:100101867|K01738 cysteine synthase [EC:2.5.1.47] | (RefSeq) OAS-TL6; cysteine synthase	Cysteine and methionine metabolism (ko00270);; Sulfur metabolism (ko00920);; Carbon metabolism (ko01200);; Biosynthesis of amino acids (ko01230)	[E]	Amino acid transport and metabolism	Pyridoxal-phosphate dependent enzyme	Cysteine synthase OS=Citrullus lanatus OX=3654 PE=1 SV=1	E	Amino acid transport and metabolism	cysteine synthase [Glycine max]
Glyma.13G115400.Wm82.a2.v1	4.00829	8.30318	3.21332e-11	1.09802	up	[GI]	Carbohydrate transport and metabolism;; Lipid transport and metabolism	Molecular Function: enzyme inhibitor activity (GO:0004857);; Molecular Function: pectinesterase activity (GO:0030599);; Biological Process: cell wall modification (GO:0042545);; Molecular Function: aspartyl esterase activity (GO:0045330);; Biological Process: pectin catabolic process (GO:0045490);;	K01051|1.0e-301|gmx:100812756|K01051 pectinesterase [EC:3.1.1.11] | (RefSeq) pectinesterase/pectinesterase inhibitor PPE8B	Pentose and glucuronate interconversions (ko00040)	--	--	Pectinesterase	Pectinesterase/pectinesterase inhibitor PPE8B OS=Prunus persica OX=3760 PE=2 SV=1	G	Carbohydrate transport and metabolism	pectinesterase/pectinesterase inhibitor PPE8B [Glycine max]
Glyma.10G291700.Wm82.a2.v1	1.09461	0.4834	0.000119155	-1.13128	down	[Q]	Secondary metabolites biosynthesis, transport and catabolism	Biological Process: fatty acid biosynthetic process (GO:0006633);; Cellular Component: membrane (GO:0016020);; Molecular Function: transferase activity, transferring acyl groups other than amino-acyl groups (GO:0016747);;	K15397|4.7e-285|gmx:100777403|K15397 3-ketoacyl-CoA synthase [EC:2.3.1.199] | (RefSeq) 3-ketoacyl-CoA synthase 19	Fatty acid elongation (ko00062);; Plant-pathogen interaction (ko04626)	--	--	FAE1/Type III polyketide synthase-like protein	3-ketoacyl-CoA synthase 19 OS=Arabidopsis thaliana OX=3702 GN=KCS19 PE=2 SV=1	I	Lipid transport and metabolism	3-ketoacyl-CoA synthase 19 [Glycine max]
Glyma.03G002900.Wm82.a2.v1	5.41584	12.4153	1.00951e-23	1.23265	up	--		Molecular Function: protein serine/threonine kinase activity (GO:0004674);; Molecular Function: ATP binding (GO:0005524);; Cellular Component: integral component of membrane (GO:0016021);; Biological Process: recognition of pollen (GO:0048544);;	K13430|2.4e-55|pvu:PHAVU_001G090800g|K13430 serine/threonine-protein kinase PBS1 [EC:2.7.11.1] | (RefSeq) hypothetical protein	Plant-pathogen interaction (ko04626)	--	--	Protein kinase domain	Putative receptor protein kinase ZmPK1 OS=Zea mays OX=4577 GN=PK1 PE=2 SV=2	T	Signal transduction mechanisms	putative receptor protein kinase ZmPK1 [Glycine max]
Glyma.08G039900.Wm82.a2.v1	13.5291	6.06013	8.25895e-11	-1.11922	down	[HR]	Coenzyme transport and metabolism;; General function prediction only	--	--	--	--	--	Alpha/beta hydrolase family	Strigolactone esterase D14 OS=Oryza sativa subsp. japonica OX=39947 GN=D14 PE=1 SV=1	S	Function unknown	uncharacterized protein LOC100810465 [Glycine max]
Glyma.02G309300.Wm82.a2.v1	4.49966	10.2684	4.12627e-08	1.22224	up	[E]	Amino acid transport and metabolism	Cellular Component: cytoplasm (GO:0005737);; Biological Process: L-phenylalanine catabolic process (GO:0006559);; Biological Process: cinnamic acid biosynthetic process (GO:0009800);; Molecular Function: phenylalanine ammonia-lyase activity (GO:0045548);;	K10775|0.0e+00|gmx:100787872|K10775 phenylalanine ammonia-lyase [EC:4.3.1.24] | (RefSeq) GMPAL3.1; phenylalanine ammonia-lyase class 3 isoform X1	Phenylalanine metabolism (ko00360);; Phenylpropanoid biosynthesis (ko00940)	[Q]	Secondary metabolites biosynthesis, transport and catabolism	Aromatic amino acid lyase	Phenylalanine ammonia-lyase class 3 OS=Phaseolus vulgaris OX=3885 PE=3 SV=1	Q	Secondary metabolites biosynthesis, transport and catabolism	phenylalanine ammonia-lyase class 3 isoform X1 [Glycine max]
Glyma.05G135000.Wm82.a2.v1	1.3226	3.52534	5.98183e-24	1.45016	up	[L]	Replication, recombination and repair	Molecular Function: ATP binding (GO:0005524);;	K10706|0.0e+00|vvi:100855072|K10706 senataxin [EC:3.6.4.-] | (RefSeq) uncharacterized LOC100855072	--	[A]	RNA processing and modification	AAA domain	Regulator of nonsense transcripts 1 homolog OS=Arabidopsis thaliana OX=3702 GN=UPF1 PE=1 SV=2	A	RNA processing and modification	hypothetical protein GLYMA_05G135000 [Glycine max]
Glyma.14G098200.Wm82.a2.v1	11.2038	3.82873	5.66091e-22	-1.51309	down	--	--	--	--	--	[K]	Transcription	--	--	K	Transcription	uncharacterized protein LOC100499733 [Glycine max]
Glyma.08G288900.Wm82.a2.v1	0.351432	0.842121	0.00015497	1.31323	up	[R]	General function prediction only	Cellular Component: integral component of membrane (GO:0016021);;	K03549|6.6e-27|csat:104769726|K03549 KUP system potassium uptake protein | (RefSeq) potassium transporter 8-like isoform X1	--	--	--	--	--	S	Function unknown	uncharacterized protein LOC100816542 [Glycine max]
Glyma.01G110100.Wm82.a2.v1	0.770613	1.63137	0.000413863	1.11705	up	--	--	--	K01593|2.3e-45|mtr:MTR_7g058700|K01593 aromatic-L-amino-acid/L-tryptophan decarboxylase [EC:4.1.1.28 4.1.1.105] | (RefSeq) tyrosine/DOPA decarboxylase	Tyrosine metabolism (ko00350);; Phenylalanine metabolism (ko00360);; Tryptophan metabolism (ko00380);; Isoquinoline alkaloid biosynthesis (ko00950);; Betalain biosynthesis (ko00965)	--	--	Protein of unknown function (DUF674)	--	S	Function unknown	uncharacterized protein LOC100819920 [Glycine max]
Glyma.13G173300.Wm82.a2.v1	4.18251	74.3342	6.79392e-12	4.16412	up	[H]	Coenzyme transport and metabolism	Molecular Function: O-methyltransferase activity (GO:0008171);; Biological Process: methylation (GO:0032259);; Molecular Function: protein dimerization activity (GO:0046983);;	K13259|7.5e-211|gmx:100807589|K13259 2,7,4'-trihydroxyisoflavanone 4'-O-methyltransferase / isoflavone 4'-O-methyltransferase [EC:2.1.1.212 2.1.1.46] | (RefSeq) isoflavone 4'-O-methyltransferase	Isoflavonoid biosynthesis (ko00943)	[R]	General function prediction only	O-methyltransferase domain	Isoflavone 4'-O-methyltransferase OS=Glycyrrhiza echinata OX=46348 GN=HI4'OMT PE=1 SV=1	S	Function unknown	isoflavone 4'-O-methyltransferase [Glycine max]
Glyma.01G025700.Wm82.a2.v1	13.579	5.35802	1.64275e-05	-1.30513	down	--	--	--	--	--	--	--	--	--	--	--	hypothetical protein GLYMA_01G025700 [Glycine max]
Glyma.14G092900.Wm82.a2.v1	2.30809	6.16618	8.70643e-12	1.44185	up	--	--	Biological Process: snRNA export from nucleus (GO:0006408);;	K14291|3.3e-125|gmx:100775515|K14291 phosphorylated adapter RNA export protein | (RefSeq) uncharacterized protein LOC100775515	RNA transport (ko03013)	[A]	RNA processing and modification	PHAX RNA-binding domain	--	A	RNA processing and modification	uncharacterized protein LOC100775515 [Glycine max]
Glyma.14G136900.Wm82.a2.v1	0.296052	0.655493	0.00286474	1.14425	up	[N]	Cell motility	Cellular Component: integral component of membrane (GO:0016021);; Molecular Function: glucomannan 4-beta-mannosyltransferase activity (GO:0047259);;	K20887|1.4e-271|mesc:110604516|K20887 xyloglucan glycosyltransferase 4 [EC:2.4.1.-] | (RefSeq) xyloglucan glycosyltransferase 4-like	--	--	--	Glycosyltransferase like family 2	Probable xyloglucan glycosyltransferase 5 OS=Arabidopsis thaliana OX=3702 GN=CSLC5 PE=1 SV=1	M	Cell wall/membrane/envelope biogenesis	probable xyloglucan glycosyltransferase 5 [Glycine max]
Glyma.16G150300.Wm82.a2.v1	0.682915	3.44457	1.42502e-17	2.33956	up	[G]	Carbohydrate transport and metabolism	Molecular Function: hydrolase activity, hydrolyzing O-glycosyl compounds (GO:0004553);; Cellular Component: cell wall (GO:0005618);; Biological Process: xyloglucan metabolic process (GO:0010411);; Molecular Function: xyloglucan:xyloglucosyl transferase activity (GO:0016762);; Biological Process: cell wall biogenesis (GO:0042546);; Cellular Component: apoplast (GO:0048046);; Biological Process: ce…	K08235|5.6e-169|gmx:100813880|K08235 xyloglucan:xyloglucosyl transferase [EC:2.4.1.207] | (RefSeq) xyloglucan endotransglucosylase/hydrolase protein A-like precursor	--	--	--	Glycosyl hydrolases family 16	Xyloglucan endotransglucosylase/hydrolase protein A OS=Phaseolus angularis OX=3914 GN=XTHA PE=1 SV=1	G	Carbohydrate transport and metabolism	LOW QUALITY PROTEIN: hypothetical protein GLYMA_16G150300 [Glycine max]
Glyma.02G009500.Wm82.a2.v1	7.49401	23.8797	2.07793e-14	1.71269	up	--	--	Biological Process: regulation of systemic acquired resistance (GO:0010112);;	--	--	--	--	NPR1 interacting	--	--	--	putative NIM1-interacting family protein [Glycine max]
Glyma.08G047500.Wm82.a2.v1	0.863168	1.9218	0.00346595	1.15918	up	[P]	Inorganic ion transport and metabolism	Molecular Function: iron ion transmembrane transporter activity (GO:0005381);; Molecular Function: manganese ion transmembrane transporter activity (GO:0005384);; Cellular Component: vacuolar membrane (GO:0005774);; Biological Process: intracellular sequestering of iron ion (GO:0006880);; Cellular Component: membrane (GO:0016020);; Cellular Component: integral component of membrane (GO:0016021);;…	K22736|9.9e-127|gmx:100814227|K22736 vacuolar iron transporter family protein | (RefSeq) vacuolar iron transporter 1	--	[S]	Function unknown	VIT family	Vacuolar iron transporter 1 OS=Arabidopsis thaliana OX=3702 GN=VIT1 PE=1 SV=1	S	Function unknown	vacuolar iron transporter 1 [Glycine max]
Glyma.14G181400.Wm82.a2.v1	16.618	6.74753	4.95705e-15	-1.26294	down	[P]	Inorganic ion transport and metabolism	Molecular Function: carbonate dehydratase activity (GO:0004089);; Molecular Function: zinc ion binding (GO:0008270);; Biological Process: cyanate catabolic process (GO:0009440);;	K01673|2.4e-127|gmx:100807954|K01673 carbonic anhydrase [EC:4.2.1.1] | (RefSeq) beta carbonic anhydrase 5, chloroplastic isoform X1	Nitrogen metabolism (ko00910)	[P]	Inorganic ion transport and metabolism	Carbonic anhydrase	Beta carbonic anhydrase 5, chloroplastic OS=Arabidopsis thaliana OX=3702 GN=BCA5 PE=2 SV=1	P	Inorganic ion transport and metabolism	beta carbonic anhydrase 5, chloroplastic isoform X1 [Glycine max]
Glyma.13G217700.Wm82.a2.v1	0.772623	2.44629	4.39723e-07	1.66999	up	--	--	Cellular Component: plasma membrane (GO:0005886);;	--	--	--	--	Protein of unknown function (DUF642)	--	S	Function unknown	uncharacterized protein LOC100788675 [Glycine max]
Glyma.09G026900.Wm82.a2.v1	0.457937	1.44856	0.000106988	1.65321	up	[C]	Energy production and conversion	Molecular Function: oxidoreductase activity (GO:0016491);; Molecular Function: FAD binding (GO:0071949);;	K22395|0.0e+00|gmx:100786800|K22395 cinnamyl-alcohol dehydrogenase [EC:1.1.1.195] | (RefSeq) berberine bridge enzyme-like 13	Phenylpropanoid biosynthesis (ko00940)	--	--	FAD binding domain	Berberine bridge enzyme-like 13 OS=Arabidopsis thaliana OX=3702 GN=At1g30760 PE=1 SV=1	C	Energy production and conversion	berberine bridge enzyme-like 13 [Glycine max]
Glyma.15G178400.Wm82.a2.v1	14.4962	4.97974	1.15964e-24	-1.50978	down	[C]	Energy production and conversion	Molecular Function: oxidoreductase activity, acting on the aldehyde or oxo group of donors, NAD or NADP as acceptor (GO:0016620);;	K14085|1.3e-293|gmx:100811186|K14085 aldehyde dehydrogenase family 7 member A1 [EC:1.2.1.31 1.2.1.8 1.2.1.3] | (RefSeq) aldehyde dehydrogenase family 7 member A1	Glycolysis / Gluconeogenesis (ko00010);; Ascorbate and aldarate metabolism (ko00053);; Fatty acid degradation (ko00071);; Glycine, serine and threonine metabolism (ko00260);; Valine, leucine and isoleucine degradation (ko00280);; Lysine degradation (ko00310);; Arginine and proline metabolism (ko00330);; Histidine metabolism (ko00340);; Tryptophan metabolism (ko00380);; beta-Alanine metabolism (ko…	[C]	Energy production and conversion	Aldehyde dehydrogenase family	Aldehyde dehydrogenase family 7 member A1 OS=Pisum sativum OX=3888 PE=1 SV=3	C	Energy production and conversion	aldehyde dehydrogenase family 7 member A1 [Glycine max]
Glyma.06G067900.Wm82.a2.v1	6.98364	1.73302	1.04232e-14	-1.96908	down	--	--	Molecular Function: transcription cofactor activity (GO:0003712);; Biological Process: regulation of transcription, DNA-templated (GO:0006355);;	--	--	--	--	--	--	--	--	uncharacterized protein LOC100791147 [Glycine max]
Glyma.18G258000.Wm82.a2.v1	0.950749	1.85643	0.00526721	1.00528	up	--	--	Molecular Function: transferase activity, transferring acyl groups other than amino-acyl groups (GO:0016747);;	K13264|1.9e-82|gmx:100127426|K13264 isoflavone 7-O-glucoside-6''-O-malonyltransferase [EC:2.3.1.115] | (RefSeq) IF7MaT; malonyl-CoA:isoflavone 7-O-glucoside-6''-O-malonyltransferase	Isoflavonoid biosynthesis (ko00943);; Flavone and flavonol biosynthesis (ko00944)	--	--	Transferase family	Phenolic glucoside malonyltransferase 1 OS=Arabidopsis thaliana OX=3702 GN=PMAT1 PE=1 SV=1	H	Coenzyme transport and metabolism	malonyl-CoA:anthocyanidin 5-O-glucoside-6''-O-malonyltransferase [Glycine max]
Glyma.10G137300.Wm82.a2.v1	3.91539	13.9066	1.28543e-27	1.85637	up	--	--	--	--	--	--	--	--	--	--	--	hypothetical protein GLYMA_10G137300 [Glycine max]
Glyma.14G193400.Wm82.a2.v1	0.981262	1.93514	0.000607068	1.01808	up	[P]	Inorganic ion transport and metabolism	Biological Process: cellular calcium ion homeostasis (GO:0006874);; Cellular Component: plant-type vacuole membrane (GO:0009705);; Molecular Function: calcium:proton antiporter activity (GO:0015369);; Cellular Component: integral component of membrane (GO:0016021);; Biological Process: calcium ion transmembrane transport (GO:0070588);;	K07300|9.9e-242|gmx:100816844|K07300 Ca2+:H+ antiporter | (RefSeq) vacuolar cation/proton exchanger 3	--	[P]	Inorganic ion transport and metabolism	Sodium/calcium exchanger protein	Vacuolar cation/proton exchanger 3 OS=Arabidopsis thaliana OX=3702 GN=CAX3 PE=1 SV=1	P	Inorganic ion transport and metabolism	vacuolar cation/proton exchanger 3 [Glycine max]
Glyma.10G261200.Wm82.a2.v1	132.261	272.562	3.43036e-14	1.08302	up	--	--	--	--	--	--	--	Peptidase of plants and bacteria	Basic secretory protease (Fragments) OS=Boswellia serrata OX=613112 PE=1 SV=1	S	Function unknown	BSP domain-containing protein precursor [Glycine max]
Glyma.05G073800.Wm82.a2.v1	1.66086	3.33703	8.90475e-08	1.03715	up	--	--	--	--	--	[R]	General function prediction only	Ankyrin repeats (3 copies)	--	M	Cell wall/membrane/envelope biogenesis	ankyrin repeat domain-containing protein 50 [Glycine max]
Glyma.17G028000.Wm82.a2.v1	5.9927	2.33849	2.46771e-10	-1.31616	down	[C]	Energy production and conversion	Cellular Component: cytoplasm (GO:0005737);; Cellular Component: mitochondrion (GO:0005739);; Molecular Function: acetyltransferase activity (GO:0016407);; Molecular Function: lipoic acid binding (GO:0031405);;	K09699|2.4e-295|gmx:100778785|K09699 2-oxoisovalerate dehydrogenase E2 component (dihydrolipoyl transacylase) [EC:2.3.1.168] | (RefSeq) lipoamide acyltransferase component of branched-chain alpha-keto acid dehydrogenase complex, mitochondrial isoform X1	Valine, leucine and isoleucine degradation (ko00280);; Propanoate metabolism (ko00640)	[C]	Energy production and conversion	2-oxoacid dehydrogenases acyltransferase (catalytic domain)	Lipoamide acyltransferase component of branched-chain alpha-keto acid dehydrogenase complex, mitochondrial OS=Arabidopsis thaliana OX=3702 GN=BCE2 PE=1 SV=1	C	Energy production and conversion	lipoamide acyltransferase component of branched-chain alpha-keto acid dehydrogenase complex, mitochondrial isoform X1 [Glycine max]
Glyma.11G095000.Wm82.a2.v1	25.8059	68.0759	4.25765e-13	1.43276	up	--	--	Molecular Function: hydrolase activity, hydrolyzing O-glycosyl compounds (GO:0004553);; Biological Process: carbohydrate metabolic process (GO:0005975);; Cellular Component: anchored component of plasma membrane (GO:0046658);;	K19891|1.8e-54|csat:104710092|K19891 glucan endo-1,3-beta-glucosidase 1/2/3 [EC:3.2.1.39] | (RefSeq) glucan endo-1,3-beta-glucosidase 3 isoform X2	Starch and sucrose metabolism (ko00500)	--	--	Glycosyl hydrolases family 17	Glucan endo-1,3-beta-glucosidase (Fragment) OS=Glycine max OX=3847 PE=2 SV=1	G	Carbohydrate transport and metabolism	glucan endo-1,3-beta-glucosidase-like [Glycine max]
Glyma.08G270300.Wm82.a2.v1	1.10389	2.99626	3.31205e-12	1.48132	up	[V]	Defense mechanisms	Molecular Function: ATP binding (GO:0005524);; Cellular Component: integral component of membrane (GO:0016021);; Molecular Function: ATPase activity (GO:0016887);; Molecular Function: ATPase activity, coupled to transmembrane movement of substances (GO:0042626);; Biological Process: transmembrane transport (GO:0055085);;	K05658|0.0e+00|gmx:100809752|K05658 ATP-binding cassette, subfamily B (MDR/TAP), member 1 [EC:7.6.2.2] | (RefSeq) ABC transporter B family member 2	ABC transporters (ko02010)	[Q]	Secondary metabolites biosynthesis, transport and catabolism	ABC transporter transmembrane region	ABC transporter B family member 2 OS=Arabidopsis thaliana OX=3702 GN=ABCB2 PE=1 SV=3	Q	Secondary metabolites biosynthesis, transport and catabolism	ABC transporter B family member 2 [Glycine max]
Glyma.19G095400.Wm82.a2.v1	2.53125	6.3509	9.70112e-13	1.36263	up	[OT]	Posttranslational modification, protein turnover, chaperones;; Signal transduction mechanisms	Molecular Function: molecular_function (GO:0003674);; Molecular Function: binding (GO:0005488);; Biological Process: regulation of transcription, DNA-templated (GO:0006355);; Biological Process: cellular protein modification process (GO:0006464);; Biological Process: nitrogen compound metabolic process (GO:0006807);; Biological Process: regulation of nitrogen utilization (GO:0006808);; Biological…	--	--	--	--	ACT domain	ACT domain-containing protein ACR6 OS=Arabidopsis thaliana OX=3702 GN=ACR6 PE=1 SV=1	S	Function unknown	ACT domain-containing protein ACR6 [Glycine max]
Glyma.10G200800.Wm82.a2.v1	3.31291	6.71449	5.6872e-05	1.052	up	[QV]	Secondary metabolites biosynthesis, transport and catabolism;; Defense mechanisms	Molecular Function: monooxygenase activity (GO:0004497);; Molecular Function: iron ion binding (GO:0005506);; Molecular Function: oxidoreductase activity, acting on paired donors, with incorporation or reduction of molecular oxygen (GO:0016705);; Molecular Function: heme binding (GO:0020037);;	K23810|7.4e-129|vvi:100232891|K23810 (E)-8-carboxylinalool synthase [EC:1.14.14.-] | (RefSeq) GFH2; ripening-related P-450 enzyme-like	Monoterpenoid biosynthesis (ko00902)	[Q]	Secondary metabolites biosynthesis, transport and catabolism	Cytochrome P450	Geraniol 8-hydroxylase OS=Swertia mussotii OX=137888 GN=CYP76B10 PE=1 SV=1	Q	Secondary metabolites biosynthesis, transport and catabolism	7-ethoxycoumarin O-deethylase-like precursor [Glycine max]
Glyma.03G098600.Wm82.a2.v1	16.6242	5.07783	1.75104e-14	-1.66363	down	[QR]	Secondary metabolites biosynthesis, transport and catabolism;; General function prediction only	Molecular Function: 2-alkenal reductase [NAD(P)] activity (GO:0032440);;	K19825|2.3e-145|vvi:100256090|K19825 2-alkenal reductase (NADP+) [EC:1.3.1.102] | (RefSeq) NADP-dependent alkenal double bond reductase P2-like	--	[R]	General function prediction only	Zinc-binding dehydrogenase	2-alkenal reductase (NADP(+)-dependent) OS=Nicotiana tabacum OX=4097 GN=DBR PE=1 SV=1	S	Function unknown	2-alkenal reductase (NADP(+)-dependent) [Glycine max]
Glyma.19G158100.Wm82.a2.v1	3.20924	1.15964	5.354e-12	-1.4285	down	--	--	Biological Process: reproduction (GO:0000003);; Cellular Component: P-body (GO:0000932);; Biological Process: response to acid chemical (GO:0001101);; Biological Process: developmental process involved in reproduction (GO:0003006);; Cellular Component: cellular_component (GO:0005575);; Cellular Component: intracellular (GO:0005622);; Cellular Component: cell (GO:0005623);; Cellular Component: cyt…	--	--	--	--	zinc-finger of the FCS-type, C2-C2	Protein MARD1 OS=Arabidopsis thaliana OX=3702 GN=MARD1 PE=1 SV=2	S	Function unknown	uncharacterized protein LOC100788456 [Glycine max]
Glyma.04G239900.Wm82.a2.v1	16.4143	4.53557	1.23564e-26	-1.81128	down	--	--	Cellular Component: cytosol (GO:0005829);; Molecular Function: lipid binding (GO:0008289);; Cellular Component: membrane (GO:0016020);; Biological Process: ceramide transport (GO:0035627);; Biological Process: intermembrane lipid transfer (GO:0120009);; Molecular Function: ceramide 1-phosphate binding (GO:1902387);; Molecular Function: ceramide 1-phosphate transporter activity (GO:1902388);;	--	--	[G]	Carbohydrate transport and metabolism	Glycolipid transfer protein (GLTP)	Glycolipid transfer protein 3 OS=Arabidopsis thaliana OX=3702 GN=GLTP3 PE=2 SV=1	G	Carbohydrate transport and metabolism	uncharacterized protein LOC100527808 [Glycine max]
Glyma.13G112500.Wm82.a2.v1	1.09037	2.73228	0.00148932	1.35405	up	[O]	Posttranslational modification, protein turnover, chaperones	Molecular Function: ATP binding (GO:0005524);; Cellular Component: mitochondrial matrix (GO:0005759);; Cellular Component: chloroplast (GO:0009507);; Cellular Component: plastid (GO:0009536);; Molecular Function: metal ion binding (GO:0046872);; Molecular Function: transition metal ion binding (GO:0046914);; Molecular Function: unfolded protein binding (GO:0051082);; Biological Process: chaperone…	K04078|2.3e-134|gmx:100804915|K04078 chaperonin GroES | (RefSeq) 20 kDa chaperonin, chloroplastic	--	[O]	Posttranslational modification, protein turnover, chaperones	Chaperonin 10 Kd subunit	20 kDa chaperonin, chloroplastic OS=Arabidopsis thaliana OX=3702 GN=CPN20 PE=1 SV=2	O	Posttranslational modification, protein turnover, chaperones	20 kDa chaperonin, chloroplastic [Glycine max]
Glyma.05G236600.Wm82.a2.v1	4.25467	0.69797	1.18406e-12	-2.54833	down	--	--	Molecular Function: enzyme inhibitor activity (GO:0004857);; Biological Process: negative regulation of catalytic activity (GO:0043086);;	K01051|5.9e-14|zma:100284955|K01051 pectinesterase [EC:3.1.1.11] | (RefSeq) pectinesterase-1 precursor	Pentose and glucuronate interconversions (ko00040)	--	--	Plant invertase/pectin methylesterase inhibitor	Pectinesterase inhibitor 7 OS=Arabidopsis thaliana OX=3702 GN=PMEI7 PE=2 SV=1	S	Function unknown	21 kDa protein [Glycine max]
Glyma.16G165900.Wm82.a2.v1	4.9726	12.7905	4.33842e-21	1.40453	up	[N]	Cell motility	Cellular Component: Golgi apparatus (GO:0005794);; Cellular Component: trans-Golgi network (GO:0005802);; Cellular Component: plasma membrane (GO:0005886);; Biological Process: plant-type primary cell wall biogenesis (GO:0009833);; Cellular Component: integral component of membrane (GO:0016021);; Molecular Function: cellulose synthase activity (GO:0016759);; Molecular Function: cellulose synthase…	K10999|0.0e+00|gmx:100798759|K10999 cellulose synthase A [EC:2.4.1.12] | (RefSeq) cellulose synthase A catalytic subunit 2 [UDP-forming]	--	--	--	Cellulose synthase	Cellulose synthase A catalytic subunit 2 [UDP-forming] OS=Arabidopsis thaliana OX=3702 GN=CESA2 PE=1 SV=1	G	Carbohydrate transport and metabolism	cellulose synthase A catalytic subunit 2 [UDP-forming] [Glycine max]
Glyma.04G248500.Wm82.a2.v1	0.485153	0.234449	0.0163853	-1.02888	down	[C]	Energy production and conversion	Molecular Function: 3-chloroallyl aldehyde dehydrogenase activity (GO:0004028);; Biological Process: cellular aldehyde metabolic process (GO:0006081);;	K00128|1.1e-276|gmx:100803104|K00128 aldehyde dehydrogenase (NAD+) [EC:1.2.1.3] | (RefSeq) aldehyde dehydrogenase family 3 member H1	Glycolysis / Gluconeogenesis (ko00010);; Ascorbate and aldarate metabolism (ko00053);; Fatty acid degradation (ko00071);; Valine, leucine and isoleucine degradation (ko00280);; Lysine degradation (ko00310);; Arginine and proline metabolism (ko00330);; Histidine metabolism (ko00340);; Tryptophan metabolism (ko00380);; beta-Alanine metabolism (ko00410);; Glycerolipid metabolism (ko00561);; Pyruvate…	[C]	Energy production and conversion	Aldehyde dehydrogenase family	Aldehyde dehydrogenase family 3 member H1 OS=Arabidopsis thaliana OX=3702 GN=ALDH3H1 PE=1 SV=2	C	Energy production and conversion	aldehyde dehydrogenase family 3 member H1 [Glycine max]
Glyma.05G013300.Wm82.a2.v1	0.737526	0.10797	5.87618e-09	-2.69882	down	--	--	Molecular Function: transcription factor activity, sequence-specific DNA binding (GO:0003700);; Cellular Component: nucleus (GO:0005634);; Molecular Function: sequence-specific DNA binding (GO:0043565);; Biological Process: regulation of shoot system development (GO:0048831);; Biological Process: regulation of secondary shoot formation (GO:2000032);;	--	--	--	--	TCP family transcription factor	Transcription factor TEOSINTE BRANCHED 1 OS=Zea mays OX=4577 GN=TB1 PE=2 SV=2	K	Transcription	transcription factor CYCLOIDEA [Glycine max]
Glyma.05G130400.Wm82.a2.v1	1.28649	2.55888	1.54571e-05	1.02043	up	--	--	Cellular Component: integral component of membrane (GO:0016021);;	--	--	--	--	Protein of unknown function (DUF616)	Probable hexosyltransferase MUCI70 OS=Arabidopsis thaliana OX=3702 GN=MUCI70 PE=1 SV=1	S	Function unknown	uncharacterized protein LOC100792354 [Glycine max]
Glyma.14G115600.Wm82.a2.v1	1.4199	0.609757	0.028107	-1.18227	down	--	--	Cellular Component: integral component of membrane (GO:0016021);;	--	--	--	--	--	--	--	--	hypothetical protein GLYMA_14G115600 [Glycine max]
Glyma.12G135600.Wm82.a2.v1	8.04867	15.903	5.74542e-11	1.0232	up	--	--	Biological Process: signal transduction (GO:0007165);; Molecular Function: ADP binding (GO:0043531);;	K00695|3.0e-104|mtr:MTR_6g478030|K00695 sucrose synthase [EC:2.4.1.13] | (RefSeq) sucrose synthase	Starch and sucrose metabolism (ko00500)	--	--	TIR domain	Disease resistance protein RPV1 OS=Vitis rotundifolia OX=103349 GN=RPV1 PE=1 SV=1	S	Function unknown	TMV resistance protein N [Glycine max]
Glycine_max_newGene_6487	2.79899	1.50089	4.29248e-05	-1.0239	down	--	--	Molecular Function: ACP phosphopantetheine attachment site binding involved in fatty acid biosynthetic process (GO:0000036);; Cellular Component: chloroplast (GO:0009507);; Molecular Function: acyl-[acyl-carrier-protein] hydrolase activity (GO:0016297);;	K10781|1.1e-29|gmx:100791811|K10781 fatty acyl-ACP thioesterase B [EC:3.1.2.14 3.1.2.21] | (RefSeq) palmitoyl-acyl carrier protein thioesterase, chloroplastic	Fatty acid biosynthesis (ko00061);; Fatty acid metabolism (ko01212)	--	--	Acyl-ACP thioesterase	Oleoyl-acyl carrier protein thioesterase, chloroplastic (Fragment) OS=Coriandrum sativum OX=4047 GN=FATA PE=2 SV=1	I	Lipid transport and metabolism	palmitoyl-acyl carrier protein thioesterase, chloroplastic [Glycine max]
Glyma.17G206300.Wm82.a2.v1	0.21617	0.748024	1.51809e-10	1.81254	up	[V]	Defense mechanisms	Molecular Function: ATP binding (GO:0005524);; Cellular Component: plasma membrane (GO:0005886);; Cellular Component: integral component of membrane (GO:0016021);; Molecular Function: ATPase activity (GO:0016887);; Molecular Function: ATPase activity, coupled to transmembrane movement of substances (GO:0042626);; Biological Process: transmembrane transport (GO:0055085);;	K08712|1.3e-136|gsl:Gasu_29800|K08712 ATP-binding cassette, subfamily G (WHITE), member 2, SNQ2 | (RefSeq) ABC transporter, ATP-binding protein	ABC transporters (ko02010)	[Q]	Secondary metabolites biosynthesis, transport and catabolism	ABC-2 type transporter	Pleiotropic drug resistance protein 1 OS=Petunia axillaris OX=33119 GN=PDR1 PE=2 SV=1	Q	Secondary metabolites biosynthesis, transport and catabolism	hypothetical protein GLYMA_17G206300 [Glycine max]
Glyma.07G125500.Wm82.a2.v1	29.6457	11.1679	1.80128e-14	-1.36977	down	--	--	--	--	--	--	--	--	--	--	--	uncharacterized protein LOC100820064 [Glycine max]
Glyma.09G128300.Wm82.a2.v1	3.66157	9.3434	3.25032e-09	1.38064	up	[G]	Carbohydrate transport and metabolism	Molecular Function: UDP-glycosyltransferase activity (GO:0008194);; Cellular Component: intracellular membrane-bounded organelle (GO:0043231);;	K22845|2.2e-119|nnu:104600246|K22845 phlorizin synthase [EC:2.4.1.357] | (RefSeq) UDP-glycosyltransferase 88B1-like	Flavonoid biosynthesis (ko00941)	[GC]	Carbohydrate transport and metabolism;; Energy production and conversion	UDP-glucoronosyl and UDP-glucosyl transferase	UDP-glycosyltransferase 13 OS=Pueraria montana var. lobata OX=3893 GN=UGT13 PE=1 SV=1	G	Carbohydrate transport and metabolism	UDP-glycosyltransferase 13 [Glycine max]
Glyma.16G004500.Wm82.a2.v1	1.61545	0.231415	1.25142e-14	-2.78697	down	--	--	Molecular Function: aminopeptidase activity (GO:0004177);;	K08776|3.8e-28|ccaj:109802346|K08776 puromycin-sensitive aminopeptidase [EC:3.4.11.-] | (RefSeq) aminopeptidase M1-like isoform X1	--	--	--	--	--	E	Amino acid transport and metabolism	hypothetical protein GLYMA_16G004500 [Glycine max]
Glyma.17G259600.Wm82.a2.v1	4.97734	14.6066	1.56818e-16	1.58711	up	[IR]	Lipid transport and metabolism;; General function prediction only	Cellular Component: extracellular region (GO:0005576);; Biological Process: lipid metabolic process (GO:0006629);; Molecular Function: lipase activity (GO:0016298);;	K00679|2.1e-67|cic:CICLE_v10027727mg|K00679 phospholipid:diacylglycerol acyltransferase [EC:2.3.1.158] | (RefSeq) hypothetical protein	Glycerolipid metabolism (ko00561)	--	--	GDSL-like Lipase/Acylhydrolase	GDSL esterase/lipase EXL1 OS=Arabidopsis thaliana OX=3702 GN=EXL1 PE=2 SV=1	I	Lipid transport and metabolism	GDSL esterase/lipase EXL1 [Glycine max]
Glyma.19G061800.Wm82.a2.v1	3.81347	1.43012	0.000711345	-1.37336	down	--	--	--	--	--	--	--	--	--	--	--	hypothetical protein GLYMA_19G061800 [Glycine max]
Glyma.18G219200.Wm82.a2.v1	0.304771	0.8232	9.1464e-06	1.45959	up	[NW]	Cell motility;; Extracellular structures	Molecular Function: protein serine/threonine kinase activity (GO:0004674);; Molecular Function: ATP binding (GO:0005524);; Cellular Component: plasma membrane (GO:0005886);; Biological Process: protein phosphorylation (GO:0006468);; Cellular Component: integral component of membrane (GO:0016021);; Biological Process: defense response to bacterium (GO:0042742);;	K24104|1.4e-80|thj:104799061|K24104 GPN-loop GTPase | (RefSeq) LOW QUALITY PROTEIN: uncharacterized protein LOC104799061	--	--	--	Salt stress response/antifungal	Cysteine-rich receptor-like protein kinase 8 OS=Arabidopsis thaliana OX=3702 GN=CRK8 PE=3 SV=2	T	Signal transduction mechanisms	cysteine-rich receptor-like protein kinase 8 [Glycine max]
Glyma.12G224300.Wm82.a2.v1	10.1804	2.23781	3.64479e-15	-2.15424	down	--	--	Cellular Component: integral component of membrane (GO:0016021);;	--	--	--	--	--	--	--	--	uncharacterized protein LOC100791650 [Glycine max]
Glyma.12G187100.Wm82.a2.v1	2.84194	5.96877	0.0059067	1.08304	up	--	--	--	K13206|2.4e-14|ghi:107902778|K13206 coiled-coil domain-containing protein 55 | (RefSeq) LOW QUALITY PROTEIN: nuclear speckle splicing regulatory protein 1	--	--	--	--	Protein GL2-INTERACTING REPRESSOR 1 OS=Arabidopsis thaliana OX=3702 GN=GIR1 PE=1 SV=1	--	--	hypothetical protein glysoja_038784 [Glycine soja]
Glyma.01G177400.Wm82.a2.v1	3.69164	1.71205	7.73696e-07	-1.06734	down	--	--	Molecular Function: transcription factor activity, sequence-specific DNA binding (GO:0003700);; Cellular Component: nucleus (GO:0005634);; Biological Process: regulation of transcription, DNA-templated (GO:0006355);; Molecular Function: sequence-specific DNA binding (GO:0043565);;	K09060|1.1e-153|gmx:100808533|K09060 plant G-box-binding factor | (RefSeq) G-box-binding factor 1 isoform X3	--	--	--	G-box binding protein MFMR	G-box-binding factor 1 OS=Arabidopsis thaliana OX=3702 GN=GBF1 PE=1 SV=2	K	Transcription	G-box-binding factor 1 isoform X1 [Glycine max]
Glyma.04G088500.Wm82.a2.v1	1.81729	3.95022	3.25874e-09	1.14898	up	--	--	Biological Process: microtubule cytoskeleton organization (GO:0000226);; Biological Process: mitotic cell cycle (GO:0000278);; Molecular Function: GTPase activity (GO:0003924);; Molecular Function: structural constituent of cytoskeleton (GO:0005200);; Molecular Function: GTP binding (GO:0005525);; Cellular Component: cytoplasm (GO:0005737);; Cellular Component: microtubule (GO:0005874);; Biologic…	K07374|6.8e-262|gmx:100779027|K07374 tubulin alpha | (RefSeq) tubulin alpha-1 chain	Phagosome (ko04145)	[Z]	Cytoskeleton	Tubulin/FtsZ family, GTPase domain	Tubulin alpha-1 chain OS=Pisum sativum OX=3888 GN=TUBA1 PE=3 SV=1	Z	Cytoskeleton	tubulin alpha-1 chain [Glycine max]
Glyma.07G169900.Wm82.a2.v1	5.46118	13.977	5.66051e-08	1.39659	up	--	--	Molecular Function: cysteine-type peptidase activity (GO:0008234);;	K01363|5.6e-33|gmx:100788988|K01363 cathepsin B [EC:3.4.22.1] | (RefSeq) cathepsin B-like protease 2	--	[O]	Posttranslational modification, protein turnover, chaperones	Papain family cysteine protease	Cathepsin B-like protease 1 OS=Arabidopsis thaliana OX=3702 GN=CATHB1 PE=2 SV=1	O	Posttranslational modification, protein turnover, chaperones	hypothetical protein GLYMA_07G169900 [Glycine max]
Glyma.16G181200.Wm82.a2.v1	2.48497	1.00583	6.64788e-06	-1.27715	down	[IQR]	Lipid transport and metabolism;; Secondary metabolites biosynthesis, transport and catabolism;; General function prediction only	--	K19329|2.8e-115|vvi:100253030|K19329 WW domain-containing oxidoreductase | (RefSeq) short-chain dehydrogenase TIC 32, chloroplastic	--	[Q]	Secondary metabolites biosynthesis, transport and catabolism	short chain dehydrogenase	Short-chain dehydrogenase TIC 32, chloroplastic OS=Pisum sativum OX=3888 GN=TIC32 PE=1 SV=1	Q	Secondary metabolites biosynthesis, transport and catabolism	short-chain dehydrogenase TIC 32, chloroplastic [Glycine max]
Glyma.16G036300.Wm82.a2.v1	21.3692	8.70728	3.41688e-25	-1.26556	down	[E]	Amino acid transport and metabolism	Biological Process: amino acid transport (GO:0006865);; Molecular Function: amino acid transmembrane transporter activity (GO:0015171);; Cellular Component: integral component of membrane (GO:0016021);;	K13863|0.0e+00|gmx:100816704|K13863 solute carrier family 7 (cationic amino acid transporter), member 1 | (RefSeq) cationic amino acid transporter 4, vacuolar	--	[E]	Amino acid transport and metabolism	Amino acid permease	Cationic amino acid transporter 4, vacuolar OS=Arabidopsis thaliana OX=3702 GN=CAT4 PE=1 SV=1	E	Amino acid transport and metabolism	cationic amino acid transporter 4, vacuolar [Glycine max]
Glyma.09G027700.Wm82.a2.v1	0.260655	1.04913	1.52051e-11	2.01609	up	[M]	Cell wall/membrane/envelope biogenesis	Molecular Function: protein serine/threonine kinase activity (GO:0004674);; Molecular Function: ATP binding (GO:0005524);; Cellular Component: plasma membrane (GO:0005886);; Biological Process: protein phosphorylation (GO:0006468);; Biological Process: cell surface receptor signaling pathway (GO:0007166);; Cellular Component: integral component of membrane (GO:0016021);; Molecular Function: polys…	K23544|2.2e-129|brp:103842861|K23544 serine incorporator 1/3 | (RefSeq) serine incorporator 3	--	--	--	Protein tyrosine and serine/threonine kinase	Wall-associated receptor kinase-like 1 OS=Arabidopsis thaliana OX=3702 GN=WAKL1 PE=2 SV=1	T	Signal transduction mechanisms	wall-associated receptor kinase-like 1 [Glycine max]
Glyma.10G227300.Wm82.a2.v1	0.120311	0.393664	0.00167028	1.67491	up	[V]	Defense mechanisms	Molecular Function: ATP binding (GO:0005524);; Cellular Component: integral component of membrane (GO:0016021);; Molecular Function: ATPase activity (GO:0016887);; Molecular Function: ATPase activity, coupled to transmembrane movement of substances (GO:0042626);;	K05666|0.0e+00|gmx:100784336|K05666 ATP-binding cassette, subfamily C (CFTR/MRP), member 2 | (RefSeq) ABC transporter C family member 10	ABC transporters (ko02010)	[Q]	Secondary metabolites biosynthesis, transport and catabolism	ABC transporter	ABC transporter C family member 10 OS=Arabidopsis thaliana OX=3702 GN=ABCC10 PE=2 SV=2	Q	Secondary metabolites biosynthesis, transport and catabolism	ABC transporter C family member 10 [Glycine max]
Glyma.01G062400.Wm82.a2.v1	0.322105	1.11008	1.48512e-09	1.80507	up	[Q]	Secondary metabolites biosynthesis, transport and catabolism	Molecular Function: copper ion binding (GO:0005507);; Molecular Function: primary amine oxidase activity (GO:0008131);; Biological Process: amine metabolic process (GO:0009308);; Molecular Function: quinone binding (GO:0048038);;	K00276|0.0e+00|gmx:100819571|K00276 primary-amine oxidase [EC:1.4.3.21] | (RefSeq) putative copper amine oxidase precursor	Glycine, serine and threonine metabolism (ko00260);; Tyrosine metabolism (ko00350);; Phenylalanine metabolism (ko00360);; beta-Alanine metabolism (ko00410);; Isoquinoline alkaloid biosynthesis (ko00950);; Tropane, piperidine and pyridine alkaloid biosynthesis (ko00960)	[Q]	Secondary metabolites biosynthesis, transport and catabolism	Copper amine oxidase, enzyme domain	Primary amine oxidase OS=Pisum sativum OX=3888 PE=1 SV=1	Q	Secondary metabolites biosynthesis, transport and catabolism	putative copper amine oxidase precursor [Glycine max]
Glyma.15G048500.Wm82.a2.v1	1.13995	2.47082	6.19499e-05	1.15689	up	[T]	Signal transduction mechanisms	Molecular Function: protein serine/threonine kinase activity (GO:0004674);; Molecular Function: ATP binding (GO:0005524);; Cellular Component: cytoplasm (GO:0005737);; Biological Process: regulation of mitotic cell cycle (GO:0007346);; Biological Process: signal transduction by protein phosphorylation (GO:0023014);; Biological Process: stress-activated protein kinase signaling cascade (GO:0031098…	K13414|1.5e-91|vvi:100241228|K13414 mitogen-activated protein kinase kinase kinase 1 [EC:2.7.11.25] | (RefSeq) mitogen-activated protein kinase kinase kinase 1	MAPK signaling pathway - plant (ko04016);; Plant-pathogen interaction (ko04626)	[T]	Signal transduction mechanisms	Protein kinase domain	Mitogen-activated protein kinase kinase kinase 1 OS=Arabidopsis thaliana OX=3702 GN=MEKK1 PE=1 SV=2	T	Signal transduction mechanisms	hypothetical protein GLYMA_15G048500 [Glycine max]
Glyma.10G178400.Wm82.a2.v1	9.58545	19.0596	1.44763e-08	1.03122	up	--	--	Molecular Function: calcium ion binding (GO:0005509);; Biological Process: calcium-mediated signaling (GO:0019722);;	K13448|4.1e-62|gmx:547787|K13448 calcium-binding protein CML | (RefSeq) SCAM-4; calmodulin	Plant-pathogen interaction (ko04626)	[T]	Signal transduction mechanisms	EF hand	Calmodulin-1 OS=Arabidopsis thaliana OX=3702 GN=CAM1 PE=1 SV=1	T	Signal transduction mechanisms	calmodulin [Glycine max]
Glyma.18G067600.Wm82.a2.v1	0.976169	3.28207	2.53756e-05	1.76479	up	--	--	Biological Process: response to red or far red light (GO:0009639);; Biological Process: negative gravitropism (GO:0009959);;	--	--	--	--	Plant protein of unknown function (DUF641)	Protein GRAVITROPIC IN THE LIGHT 1 OS=Arabidopsis thaliana OX=3702 GN=GIL1 PE=1 SV=1	S	Function unknown	hypothetical protein GLYMA_18G067600 [Glycine max]
Glyma.03G010200.Wm82.a2.v1	3.2114	0.15347	1.15354e-32	-4.27169	down	--	--	Cellular Component: integral component of membrane (GO:0016021);;	--	--	--	--	Plant phosphoribosyltransferase C-terminal	FT-interacting protein 7 OS=Oryza sativa subsp. japonica OX=39947 GN=FTIP7 PE=1 SV=1	S	Function unknown	hypothetical protein GLYMA_03G010200 [Glycine max]
Glyma.19G151200.Wm82.a2.v1	0.357202	2.51406	1.19827e-12	2.7378	up	--	--	Biological Process: jasmonic acid biosynthetic process (GO:0009695);; Molecular Function: allene-oxide cyclase activity (GO:0046423);; Cellular Component: apoplast (GO:0048046);;	K01870|2.8e-28|eus:EUTSA_v10003524mg|K01870 isoleucyl-tRNA synthetase [EC:6.1.1.5] | (RefSeq) hypothetical protein	Aminoacyl-tRNA biosynthesis (ko00970)	--	--	Dirigent-like protein	Pterocarpan synthase 1 OS=Glycine max OX=3847 GN=PTS1 PE=2 SV=1	S	Function unknown	pterocarpan synthase precursor [Glycine max]
Glyma.02G209600.Wm82.a2.v1	3.37584	1.4506	4.84152e-09	-1.17531	down	--	--	--	--	--	--	--	--	--	--	--	uncharacterized protein LOC100801655 isoform X1 [Glycine max]
Glyma.01G215300.Wm82.a2.v1	4.28793	1.58016	1.57486e-06	-1.42316	down	--	--	Biological Process: reproduction (GO:0000003);; Biological Process: immune system process (GO:0002376);; Biological Process: developmental process involved in reproduction (GO:0003006);; Molecular Function: molecular_function (GO:0003674);; Molecular Function: catalytic activity (GO:0003824);; Molecular Function: phospholipase activity (GO:0004620);; Molecular Function: phospholipase D activity (…	K01115|2.2e-46|gmx:100786241|K01115 phospholipase D1/2 [EC:3.1.4.4] | (RefSeq) phospholipase D gamma 1	Glycerophospholipid metabolism (ko00564);; Ether lipid metabolism (ko00565);; Endocytosis (ko04144)	[I]	Lipid transport and metabolism	Phospholipase D C terminal	Phospholipase D beta 1 OS=Arabidopsis thaliana OX=3702 GN=PLDBETA1 PE=1 SV=4	I	Lipid transport and metabolism	hypothetical protein GLYMA_01G215300 [Glycine max]
Glyma.04G040300.Wm82.a2.v1	7.36189	17.1293	3.67047e-10	1.25326	up	--	--	Molecular Function: transferase activity, transferring acyl groups other than amino-acyl groups (GO:0016747);;	K19747|2.2e-61|zju:107423492|K19747 BAHD acyltransferase [EC:2.3.1.-] | (RefSeq) BAHD acyltransferase DCR-like	--	--	--	Transferase family	Protein ENHANCED PSEUDOMONAS SUSCEPTIBILITY 1 OS=Arabidopsis thaliana OX=3702 GN=EPS1 PE=2 SV=1	S	Function unknown	N-hydroxycinnamoyl/benzoyltransferase 3 [Glycine max]
Glyma.14G103100.Wm82.a2.v1	21.8051	56.203	2.20637e-14	1.40644	up	--	--	Molecular Function: transcription factor activity, sequence-specific DNA binding (GO:0003700);; Cellular Component: nucleus (GO:0005634);; Molecular Function: sequence-specific DNA binding (GO:0043565);;	K13426|2.0e-17|qsu:111983032|K13426 WRKY transcription factor 29 | (RefSeq) probable WRKY transcription factor 29	MAPK signaling pathway - plant (ko04016);; Plant-pathogen interaction (ko04626)	--	--	WRKY DNA -binding domain	Probable WRKY transcription factor 40 OS=Arabidopsis thaliana OX=3702 GN=WRKY40 PE=1 SV=1	K	Transcription	probable WRKY transcription factor 40 [Glycine max]
Glyma.08G260200.Wm82.a2.v1	0.55114	1.33452	2.50454e-06	1.30051	up	[S]	Function unknown	Cellular Component: plant-type vacuole membrane (GO:0009705);; Biological Process: malate transport (GO:0015743);; Cellular Component: integral component of membrane (GO:0016021);;	K03695|1.9e-24|egr:104416563|K03695 ATP-dependent Clp protease ATP-binding subunit ClpB | (RefSeq) chaperone protein ClpB1-like	--	[R]	General function prediction only	Aluminium activated malate transporter	Aluminum-activated malate transporter 4 OS=Arabidopsis thaliana OX=3702 GN=ALMT4 PE=3 SV=1	S	Function unknown	aluminum-activated malate transporter 4 [Glycine max]
Glyma.02G258000.Wm82.a2.v1	1.26871	3.90046	1.19258e-13	1.65396	up	--	--	Cellular Component: Golgi apparatus (GO:0005794);; Cellular Component: integral component of membrane (GO:0016021);; Molecular Function: O-acetyltransferase activity (GO:0016413);;	K23877|1.8e-37|soe:110782899|K23877 xyloglucan O-acetyltransferase | (RefSeq) protein ALTERED XYLOGLUCAN 4 isoform X1	--	--	--	GDSL/SGNH-like Acyl-Esterase family found in Pmr5 and Cas1p	Protein ESKIMO 1 OS=Arabidopsis thaliana OX=3702 GN=ESK1 PE=1 SV=1	S	Function unknown	protein ESKIMO 1 isoform X1 [Glycine max]
Glyma.09G021100.Wm82.a2.v1	0.830722	5.68517	3.60138e-26	2.79195	up	[G]	Carbohydrate transport and metabolism	Molecular Function: polygalacturonase activity (GO:0004650);; Biological Process: carbohydrate metabolic process (GO:0005975);;	K01184|1.3e-226|gmx:100786608|K01184 polygalacturonase [EC:3.2.1.15] | (RefSeq) polygalacturonase	Pentose and glucuronate interconversions (ko00040)	--	--	Glycosyl hydrolases family 28	Polygalacturonase OS=Prunus persica OX=3760 PE=2 SV=1	G	Carbohydrate transport and metabolism	hypothetical protein GLYMA_09G021100 [Glycine max]
Glyma.17G044300.Wm82.a2.v1	1.76451	0.485657	1.27644e-09	-1.82611	down	[E]	Amino acid transport and metabolism	Cellular Component: integral component of membrane (GO:0016021);; Molecular Function: oxidoreductase activity (GO:0016491);;	K14157|0.0e+00|gmx:100811246|K14157 alpha-aminoadipic semialdehyde synthase [EC:1.5.1.8 1.5.1.9] | (RefSeq) alpha-aminoadipic semialdehyde synthase	Lysine degradation (ko00310)	[E]	Amino acid transport and metabolism	Saccharopine dehydrogenase C-terminal domain	Alpha-aminoadipic semialdehyde synthase OS=Arabidopsis thaliana OX=3702 GN=LKR/SDH PE=1 SV=1	E	Amino acid transport and metabolism	alpha-aminoadipic semialdehyde synthase [Glycine max]
Glyma.05G062400.Wm82.a2.v1	20.397	9.18675	1.06178e-14	-1.10764	down	[Q]	Secondary metabolites biosynthesis, transport and catabolism	Molecular Function: oxidoreductase activity (GO:0016491);; Molecular Function: metal ion binding (GO:0046872);;	K24028|3.3e-29|mus:103993175|K24028 salicylic acid 3-hydroxylase [EC:1.14.11.-] | (RefSeq) protein DOWNY MILDEW RESISTANCE 6	--	[QR]	Secondary metabolites biosynthesis, transport and catabolism;; General function prediction only	non-haem dioxygenase in morphine synthesis N-terminal	Probable 2-oxoglutarate-dependent dioxygenase At3g111800 OS=Arabidopsis thaliana OX=3702 GN=At3g11180 PE=2 SV=1	Q	Secondary metabolites biosynthesis, transport and catabolism	2-oxoglutarate-Fe(II) type oxidoreductase hxnY [Glycine max]
Glyma.09G217600.Wm82.a2.v1	15.4953	7.14132	8.8804e-05	-1.09484	down	--	--	--	--	--	--	--	--	--	--	--	hypothetical protein glysoja_006247 [Glycine soja]
Glyma.09G123900.Wm82.a2.v1	2.97795	0.956128	3.64815e-06	-1.60125	down	--	--	--	--	--	--	--	--	--	--	--	hypothetical protein GLYMA_09G123900 [Glycine max]
Glyma.08G163400.Wm82.a2.v1	0.330614	0.798239	0.000444358	1.26401	up	--	--	--	--	--	--	--	Protein of unknown function (DUF620)	--	S	Function unknown	uncharacterized protein LOC100791744 [Glycine max]
Glyma.02G154500.Wm82.a2.v1	141.639	66.4893	3.99444e-14	-1.05772	down	--	--	--	--	--	--	--	--	--	--	--	uncharacterized protein LOC112999520 [Glycine max]
Glyma.19G124600.Wm82.a2.v1	0.213406	0.539565	0.000355376	1.34954	up	[G]	Carbohydrate transport and metabolism	Biological Process: L-arabinose metabolic process (GO:0046373);; Molecular Function: alpha-L-arabinofuranosidase activity (GO:0046556);;	K01209|0.0e+00|gmx:100787734|K01209 alpha-L-arabinofuranosidase [EC:3.2.1.55] | (RefSeq) alpha-L-arabinofuranosidase 1	Amino sugar and nucleotide sugar metabolism (ko00520)	--	--	Alpha-L-arabinofuranosidase C-terminal domain	Alpha-L-arabinofuranosidase 1 OS=Arabidopsis thaliana OX=3702 GN=ASD1 PE=1 SV=1	G	Carbohydrate transport and metabolism	alpha-L-arabinofuranosidase 1 [Glycine max]
Glyma.10G297000.Wm82.a2.v1	5.03253	11.4003	3.16763e-06	1.19916	up	--	--	--	--	--	--	--	--	--	S	Function unknown	hypothetical protein GLYMA_10G297000 [Glycine max]
Glyma.08G346900.Wm82.a2.v1	3.11863	1.136	5.0542e-09	-1.41737	down	--	--	--	K09060|6.1e-30|oeu:111382929|K09060 plant G-box-binding factor | (RefSeq) bZIP transcription factor 16-like	--	--	--	Protein of unknown function (DUF760)	UV-B-induced protein At3g17800, chloroplastic OS=Arabidopsis thaliana OX=3702 GN=At3g17800 PE=2 SV=1	S	Function unknown	UV-B-induced protein At3g17800, chloroplastic [Glycine max]
Glyma.16G040400.Wm82.a2.v1	19.6444	54.6969	2.9483e-09	1.52035	up	--	--	Cellular Component: integral component of membrane (GO:0016021);;	--	--	--	--	--	Arabinogalactan protein 14 OS=Arabidopsis thaliana OX=3702 GN=AGP14 PE=1 SV=1	--	--	arabinogalactan protein 14-like [Glycine max]
Glyma.20G192700.Wm82.a2.v1	1.62367	9.72735	1.46305e-21	2.62242	up	[I]	Lipid transport and metabolism	Molecular Function: lanosterol synthase activity (GO:0000250);; Cellular Component: lipid droplet (GO:0005811);; Biological Process: triterpenoid biosynthetic process (GO:0016104);; Molecular Function: beta-amyrin synthase activity (GO:0042300);;	K20659|0.0e+00|gmx:100810400|K20659 lupeol synthase [EC:5.4.99.41] | (RefSeq) lupeol synthase	Sesquiterpenoid and triterpenoid biosynthesis (ko00909)	[I]	Lipid transport and metabolism	Squalene-hopene cyclase C-terminal domain	Lupeol synthase OS=Glycyrrhiza glabra OX=49827 GN=LUS1 PE=1 SV=1	I	Lipid transport and metabolism	hypothetical protein GLYMA_20G192700 [Glycine max]
Glyma.12G069300.Wm82.a2.v1	2.16051	6.93947	3.27485e-21	1.71362	up	--	--	Cellular Component: plasma membrane (GO:0005886);; Biological Process: plant-type secondary cell wall biogenesis (GO:0009834);;	--	--	--	--	Fasciclin domain	Fasciclin-like arabinogalactan protein 12 OS=Arabidopsis thaliana OX=3702 GN=FLA12 PE=2 SV=2	S	Function unknown	fasciclin-like arabinogalactan protein 12 [Glycine max]
Glyma.13G118500.Wm82.a2.v1	0.3737	0.116492	1.66414e-05	-1.61594	down	[V]	Defense mechanisms	Molecular Function: ATP binding (GO:0005524);; Cellular Component: integral component of membrane (GO:0016021);; Molecular Function: ATPase activity (GO:0016887);; Molecular Function: ATPase activity, coupled to transmembrane movement of substances (GO:0042626);; Biological Process: transmembrane transport (GO:0055085);;	K05658|0.0e+00|gmx:100798707|K05658 ATP-binding cassette, subfamily B (MDR/TAP), member 1 [EC:7.6.2.2] | (RefSeq) ABC transporter B family member 4 isoform X1	ABC transporters (ko02010)	[Q]	Secondary metabolites biosynthesis, transport and catabolism	ABC transporter transmembrane region	ABC transporter B family member 11 OS=Arabidopsis thaliana OX=3702 GN=ABCB11 PE=2 SV=1	Q	Secondary metabolites biosynthesis, transport and catabolism	hypothetical protein GLYMA_13G118500 [Glycine max]
Glyma.20G136000.Wm82.a2.v1	10.008	23.2472	2.29164e-24	1.2525	up	--	--	Molecular Function: GTPase activity (GO:0003924);; Molecular Function: structural constituent of cytoskeleton (GO:0005200);; Molecular Function: GTP binding (GO:0005525);; Cellular Component: cytoplasm (GO:0005737);; Cellular Component: microtubule (GO:0005874);; Biological Process: microtubule-based process (GO:0007017);;	K07374|2.3e-262|gmx:100781185|K07374 tubulin alpha | (RefSeq) tubulin alpha-4 chain	Phagosome (ko04145)	[Z]	Cytoskeleton	Tubulin/FtsZ family, GTPase domain	Tubulin alpha-4 chain OS=Gossypium hirsutum OX=3635 PE=2 SV=1	Z	Cytoskeleton	tubulin alpha-4 chain [Glycine max]
Glyma.01G124500.Wm82.a2.v1	5.79372	14.2276	1.34928e-13	1.33714	up	[P]	Inorganic ion transport and metabolism	Molecular Function: ferroxidase activity (GO:0004322);; Biological Process: iron ion transport (GO:0006826);; Biological Process: cellular iron ion homeostasis (GO:0006879);; Molecular Function: ferric iron binding (GO:0008199);;	K00522|1.8e-142|gmx:547988|K00522 ferritin heavy chain [EC:1.16.3.2] | (RefSeq) SFERH-2; ferritin-2, chloroplastic	--	[P]	Inorganic ion transport and metabolism	Ferritin-like domain	Ferritin-2, chloroplastic OS=Glycine max OX=3847 PE=1 SV=1	P	Inorganic ion transport and metabolism	ferritin-2, chloroplastic [Glycine max]
Glyma.13G242500.Wm82.a2.v1	3.0986	8.65736	9.06746e-09	1.50181	up	--	--	--	--	--	--	--	--	--	--	--	hypothetical protein glysoja_014318 [Glycine soja]
Glyma.08G191300.Wm82.a2.v1	0.936328	1.91871	1.99523e-05	1.05629	up	[S]	Function unknown	--	K15015|1.3e-11|aip:107609646|K15015 solute carrier family 32 (vesicular inhibitory amino acid transporter) | (RefSeq) uncharacterized protein LOC107609646 isoform X1	--	--	--	--	IQ domain-containing protein IQM1 OS=Arabidopsis thaliana OX=3702 GN=IQM1 PE=1 SV=1	S	Function unknown	IQ domain-containing protein IQM1 [Glycine max]
Glyma.10G003600.Wm82.a2.v1	3.24936	1.24479	2.28694e-06	-1.26859	down	--	--	--	--	--	--	--	--	--	--	--	uncharacterized protein LOC100807319 isoform X1 [Glycine max]
Glyma.14G116000.Wm82.a2.v1	10.4415	4.13698	3.41323e-13	-1.30643	down	[R]	General function prediction only	Molecular Function: protein kinase activity (GO:0004672);; Molecular Function: ATP binding (GO:0005524);; Cellular Component: integral component of membrane (GO:0016021);;	K16279|2.3e-32|cmax:111472627|K16279 E3 ubiquitin-protein ligase KEG [EC:2.7.11.1 2.3.2.27] | (RefSeq) E3 ubiquitin-protein ligase KEG	--	[T]	Signal transduction mechanisms	Protein tyrosine and serine/threonine kinase	E3 ubiquitin-protein ligase KEG OS=Arabidopsis thaliana OX=3702 GN=KEG PE=1 SV=2	T	Signal transduction mechanisms	E3 ubiquitin-protein ligase KEG [Glycine max]
Glyma.02G138600.Wm82.a2.v1	10.3316	20.6937	3.63694e-07	1.02991	up	--	--	--	--	--	--	--	--	--	--	--	myosin-5 [Glycine max]
Glyma.01G173600.Wm82.a2.v1	0.378806	1.16502	0.00064985	1.65863	up	[DPM]	Cell cycle control, cell division, chromosome partitioning;; Inorganic ion transport and metabolism;; Cell wall/membrane/envelope biogenesis	Molecular Function: ferroxidase activity (GO:0004322);; Molecular Function: copper ion binding (GO:0005507);; Cellular Component: plasma membrane (GO:0005886);; Biological Process: iron ion transport (GO:0006826);; Biological Process: lignin catabolic process (GO:0046274);; Cellular Component: apoplast (GO:0048046);; Molecular Function: hydroquinone:oxygen oxidoreductase activity (GO:0052716);; B…	K05909|0.0e+00|gmx:100820452|K05909 laccase [EC:1.10.3.2] | (RefSeq) laccase-11	--	[Q]	Secondary metabolites biosynthesis, transport and catabolism	Multicopper oxidase	Laccase-11 OS=Arabidopsis thaliana OX=3702 GN=LAC11 PE=2 SV=1	Q	Secondary metabolites biosynthesis, transport and catabolism	laccase-11 [Glycine max]
Glyma.02G213500.Wm82.a2.v1	4.02288	1.47001	1.26479e-11	-1.41806	down	--	--	Molecular Function: AT DNA binding (GO:0003680);; Molecular Function: transcription factor activity, sequence-specific DNA binding (GO:0003700);; Cellular Component: nucleus (GO:0005634);;	--	--	--	--	Plants and Prokaryotes Conserved (PCC) domain	AT-hook motif nuclear-localized protein 17 OS=Arabidopsis thaliana OX=3702 GN=AHL17 PE=2 SV=1	K	Transcription	AT-hook motif nuclear-localized protein 28 [Glycine max]
Glyma.11G018100.Wm82.a2.v1	4.11918	1.73955	1.74596e-09	-1.20161	down	--	--	Molecular Function: DNA binding (GO:0003677);; Molecular Function: transcription factor activity, sequence-specific DNA binding (GO:0003700);; Cellular Component: nucleus (GO:0005634);;	K09286|5.0e-33|csat:104751702|K09286 EREBP-like factor | (RefSeq) ethylene-responsive transcription factor RAP2-4-like	--	--	--	AP2 domain	Ethylene-responsive transcription factor ERF061 OS=Arabidopsis thaliana OX=3702 GN=ERF061 PE=2 SV=1	K	Transcription	AP2-EREBP transcription factor [Glycine max]
Glyma.09G266000.Wm82.a2.v1	0.373482	1.22331	0.000814494	1.6949	up	[O]	Posttranslational modification, protein turnover, chaperones	Molecular Function: serine-type endopeptidase activity (GO:0004252);;	K15333|6.3e-71|nsy:104224633|K15333 tRNA guanosine-2'-O-methyltransferase [EC:2.1.1.34] | (RefSeq) uncharacterized protein LOC104224633	--	--	--	Subtilase family	Subtilisin-like protease SBT4.14 OS=Arabidopsis thaliana OX=3702 GN=SBT4.14 PE=2 SV=1	O	Posttranslational modification, protein turnover, chaperones	subtilisin-like protease SBT4.14 [Glycine max]
Glyma.18G042100.Wm82.a2.v1	19.2432	3.13232	5.61567e-07	-2.5625	down	--	--	Molecular Function: ubiquitin-protein transferase activity (GO:0004842);;	K10260|3.0e-17|ota:OT_ostta09g00430|K10260 F-box and WD-40 domain protein 7 | (RefSeq) WD40/YVTN repeat-like-containing domain	Ubiquitin mediated proteolysis (ko04120)	--	--	U-box domain	U-box domain-containing protein 21 OS=Arabidopsis thaliana OX=3702 GN=PUB21 PE=2 SV=1	H	Coenzyme transport and metabolism	syringolide-induced protein 13-1-1 [Glycine max]
Glyma.01G196800.Wm82.a2.v1	0.274662	0.833256	6.31229e-05	1.61797	up	--	--	Molecular Function: hydrolase activity, hydrolyzing O-glycosyl compounds (GO:0004553);; Cellular Component: cell wall (GO:0005618);; Biological Process: xyloglucan metabolic process (GO:0010411);; Molecular Function: xyloglucan:xyloglucosyl transferase activity (GO:0016762);; Biological Process: cell wall biogenesis (GO:0042546);; Cellular Component: apoplast (GO:0048046);; Biological Process: ce…	K08235|8.6e-181|gmx:100784660|K08235 xyloglucan:xyloglucosyl transferase [EC:2.4.1.207] | (RefSeq) probable xyloglucan endotransglucosylase/hydrolase protein 6	--	--	--	Glycosyl hydrolases family 16	Probable xyloglucan endotransglucosylase/hydrolase protein 6 OS=Arabidopsis thaliana OX=3702 GN=XTH6 PE=2 SV=2	G	Carbohydrate transport and metabolism	probable xyloglucan endotransglucosylase/hydrolase protein 6 [Glycine max]
Glyma.08G212900.Wm82.a2.v1	7.17887	13.9503	4.8531e-10	1.00384	up	[I]	Lipid transport and metabolism	Cellular Component: endoplasmic reticulum membrane (GO:0005789);; Biological Process: fatty acid biosynthetic process (GO:0006633);; Molecular Function: 16:0 monogalactosyldiacylglycerol desaturase activity (GO:0009979);; Cellular Component: integral component of membrane (GO:0016021);; Molecular Function: oxidoreductase activity, acting on paired donors, with oxidation of a pair of donors result…	K20416|5.3e-239|gmx:100527024|K20416 palmitoyl-[glycerolipid] 7-desaturase [EC:1.14.19.42] | (RefSeq) FAD5.2; delta-7 desaturase	--	[I]	Lipid transport and metabolism	Fatty acid desaturase	Palmitoyl-monogalactosyldiacylglycerol delta-7 desaturase, chloroplastic OS=Arabidopsis thaliana OX=3702 GN=ADS3 PE=1 SV=2	I	Lipid transport and metabolism	delta-7 desaturase [Glycine max]
Glyma.16G075800.Wm82.a2.v1	0.259037	0.718634	0.000769198	1.37708	up	--	--	Cellular Component: extracellular region (GO:0005576);; Cellular Component: cell wall (GO:0005618);; Molecular Function: hydrolase activity (GO:0016787);; Biological Process: cell wall organization (GO:0071555);;	K01280|4.2e-114|spen:107013676|K01280 tripeptidyl-peptidase II [EC:3.4.14.10] | (RefSeq) tripeptidyl-peptidase 2-like isoform X1	--	[M]	Cell wall/membrane/envelope biogenesis	Pectinacetylesterase	Pectin acetylesterase 8 OS=Arabidopsis thaliana OX=3702 GN=PAE8 PE=2 SV=1	M	Cell wall/membrane/envelope biogenesis	pectin acetylesterase 8 [Glycine max]
Glyma.10G239700.Wm82.a2.v1	3.0428	7.44248	6.33157e-06	1.3175	up	--	--	--	K03363|1.7e-08|mtr:MTR_7g055590|K03363 cell division cycle 20, cofactor of APC complex | (RefSeq) transducin family protein/WD-40 repeat protein	Ubiquitin mediated proteolysis (ko04120)	--	--	--	--	S	Function unknown	uncharacterized protein LOC100500258 precursor [Glycine max]
Glyma.13G164400.Wm82.a2.v1	0.792606	0.25989	8.77695e-05	-1.56651	down	--	--	--	--	--	--	--	--	--	--	--	hypothetical protein GLYMA_13G164400 [Glycine max]
Glyma.09G068400.Wm82.a2.v1	10.1935	4.93424	4.68192e-10	-1.00753	down	--	--	Molecular Function: DNA binding (GO:0003677);; Molecular Function: transcription factor activity, sequence-specific DNA binding (GO:0003700);; Cellular Component: CCAAT-binding factor complex (GO:0016602);;	K08064|9.4e-127|gmx:100793856|K08064 nuclear transcription factor Y, alpha | (RefSeq) GMNF-YA09; nuclear transcription factor Y subunit A-9	--	[K]	Transcription	CCAAT-binding transcription factor (CBF-B/NF-YA) subunit B	Nuclear transcription factor Y subunit A-3 OS=Arabidopsis thaliana OX=3702 GN=NFYA3 PE=2 SV=2	K	Transcription	nuclear transcription factor Y subunit A-9 [Glycine max]
Glyma.01G021900.Wm82.a2.v1	8.85522	4.1442	4.25655e-08	-1.058	down	--	--	Molecular Function: UDP-glycosyltransferase activity (GO:0008194);; Cellular Component: intracellular membrane-bounded organelle (GO:0043231);;	K22706|3.1e-37|pmum:103319663|K22706 (R)-mandelonitrile beta-glucosyltransferase [EC:2.4.1.354] | (RefSeq) 7-deoxyloganetin glucosyltransferase-like	Cyanoamino acid metabolism (ko00460)	[GC]	Carbohydrate transport and metabolism;; Energy production and conversion	UDP-glucoronosyl and UDP-glucosyl transferase	7-deoxyloganetic acid glucosyl transferase OS=Catharanthus roseus OX=4058 GN=7DLGT PE=1 SV=1	--	--	hypothetical protein GLYMA_01G021900 [Glycine max]
Glyma.16G165200.Wm82.a2.v1	31.5565	140.265	2.491e-22	2.18158	up	--	--	Biological Process: response to light stimulus (GO:0009416);; Cellular Component: photosystem I (GO:0009522);; Cellular Component: photosystem II (GO:0009523);; Cellular Component: chloroplast thylakoid membrane (GO:0009535);; Biological Process: photosynthesis, light harvesting in photosystem I (GO:0009768);; Cellular Component: chloroplast envelope (GO:0009941);; Cellular Component: plastoglobu…	K08912|4.8e-151|gmx:100799813|K08912 light-harvesting complex II chlorophyll a/b binding protein 1 | (RefSeq) chlorophyll a-b binding protein of LHCII type 1	Photosynthesis - antenna proteins (ko00196)	--	--	Chlorophyll A-B binding protein	Chlorophyll a-b binding protein 3, chloroplastic OS=Glycine max OX=3847 GN=CAB3 PE=3 SV=1	C	Energy production and conversion	chlorophyll a-b binding protein of LHCII type 1 [Glycine max]
Glycine_max_newGene_3905	0.289497	0.766407	4.71065e-05	1.45761	up	--	--	Cellular Component: endoplasmic reticulum membrane (GO:0005789);; Biological Process: GPI anchor biosynthetic process (GO:0006506);; Cellular Component: integral component of membrane (GO:0016021);; Molecular Function: transferase activity (GO:0016740);;	K13447|5.0e-15|han:110870266|K13447 respiratory burst oxidase [EC:1.6.3.- 1.11.1.-] | (RefSeq) respiratory burst oxidase homolog protein D-like	MAPK signaling pathway - plant (ko04016);; Plant-pathogen interaction (ko04626)	--	--	--	--	--	--	uncharacterized protein LOC114371436 [Glycine soja]
Glyma.04G228800.Wm82.a2.v1	50.3676	21.0172	0.00221379	-1.20954	down	--	--	--	--	--	--	--	--	--	--	--	hypothetical protein GLYMA_04G228800 [Glycine max]
Glyma.02G135800.Wm82.a2.v1	12.1136	4.06438	8.44301e-14	-1.53364	down	--	--	--	--	--	--	--	--	--	--	--	hypothetical protein glysoja_032559 [Glycine soja]
Glyma.02G130200.Wm82.a2.v1	0.198139	0.51484	5.2459e-05	1.3833	up	--	--	Molecular Function: inositol monophosphate 1-phosphatase activity (GO:0008934);; Cellular Component: integral component of membrane (GO:0016021);; Molecular Function: inositol monophosphate 3-phosphatase activity (GO:0052832);; Molecular Function: inositol monophosphate 4-phosphatase activity (GO:0052833);;	K24195|0.0e+00|gmx:100787164|K24195 xenotropic and polytropic retrovirus receptor 1 | (RefSeq) GMAPHO1:H14; phosphate transporter PHO1 homolog 1	--	[U]	Intracellular trafficking, secretion, and vesicular transport	EXS family	Phosphate transporter PHO1 homolog 1 OS=Arabidopsis thaliana OX=3702 GN=PHO1-H1 PE=2 SV=1	U	Intracellular trafficking, secretion, and vesicular transport	phosphate transporter PHO1 homolog 1 [Glycine max]
Glyma.03G084200.Wm82.a2.v1	5.47522	2.41748	0.000643923	-1.15084	down	--	--	Molecular Function: manganese ion transmembrane transporter activity (GO:0005384);; Cellular Component: integral component of membrane (GO:0016021);; Biological Process: cellular manganese ion homeostasis (GO:0030026);;	K22736|4.3e-06|mtr:MTR_7g076320|K22736 vacuolar iron transporter family protein | (RefSeq) vacuolar iron transporter-like protein	--	--	--	--	Membrane protein of ER body-like protein OS=Arabidopsis thaliana OX=3702 GN=MEBL PE=2 SV=1	S	Function unknown	membrane protein of ER body 2 [Glycine max]
Glyma.10G100800.Wm82.a2.v1	0.461366	1.37653	1.50502e-06	1.61767	up	[F]	Nucleotide transport and metabolism	Molecular Function: guanylate kinase activity (GO:0004385);; Cellular Component: cytosol (GO:0005829);;	K00942|5.7e-228|gmx:100809808|K00942 guanylate kinase [EC:2.7.4.8] | (RefSeq) guanylate kinase 2	Purine metabolism (ko00230)	[F]	Nucleotide transport and metabolism	Guanylate kinase	Guanylate kinase 2 OS=Arabidopsis thaliana OX=3702 GN=GK-2 PE=2 SV=1	F	Nucleotide transport and metabolism	Guanylate kinase 2 [Glycine soja]
Glyma.09G026800.Wm82.a2.v1	0.430575	1.10588	6.19499e-05	1.40068	up	[I]	Lipid transport and metabolism	Molecular Function: iron ion binding (GO:0005506);; Cellular Component: endoplasmic reticulum (GO:0005783);; Biological Process: fatty acid metabolic process (GO:0006631);; Biological Process: lipid biosynthetic process (GO:0008610);; Cellular Component: integral component of membrane (GO:0016021);; Molecular Function: fatty acid alpha-hydroxylase activity (GO:0080132);;	K19706|9.0e-141|gmx:100784159|K19706 dihydroceramide fatty acyl 2-hydroxylase [EC:1.14.18.7] | (RefSeq) dihydroceramide fatty acyl 2-hydroxylase FAH1 isoform X2	--	[I]	Lipid transport and metabolism	Fatty acid hydroxylase superfamily	Dihydroceramide fatty acyl 2-hydroxylase FAH1 OS=Arabidopsis thaliana OX=3702 GN=FAH1 PE=1 SV=1	I	Lipid transport and metabolism	Dihydroceramide fatty acyl 2-hydroxylase FAH1, partial [Glycine soja]
Glyma.12G111400.Wm82.a2.v1	0.369199	0.812677	0.00133145	1.14319	up	[T]	Signal transduction mechanisms	Cellular Component: membrane (GO:0016020);; Cellular Component: integral component of membrane (GO:0016021);;	K15503|1.7e-213|gmx:102660244|K15503 serine/threonine-protein phosphatase 6 regulatory ankyrin repeat subunit B | (RefSeq) protein ACCELERATED CELL DEATH 6	--	[R]	General function prediction only	Ankyrin repeats (3 copies)	Protein ACCELERATED CELL DEATH 6 OS=Arabidopsis thaliana OX=3702 GN=ACD6 PE=1 SV=1	S	Function unknown	protein ACCELERATED CELL DEATH 6 [Glycine max]
Glyma.19G059200.Wm82.a2.v1	5.8486	2.12535	5.1144e-05	-1.41527	down	--	--	Cellular Component: cell wall (GO:0005618);; Molecular Function: manganese ion binding (GO:0030145);; Molecular Function: nutrient reservoir activity (GO:0045735);; Cellular Component: apoplast (GO:0048046);;	K15025|7.2e-07|cann:107844742|K15025 probable RNA-binding protein EIF1AD | (RefSeq) germin-like protein subfamily 1 member 15	--	--	--	Cupin	Germin-like protein subfamily 1 member 7 OS=Arabidopsis thaliana OX=3702 GN=At3g05950 PE=2 SV=1	S	Function unknown	Germin-like protein subfamily 1 member 7 [Glycine soja]
Glyma.15G222900.Wm82.a2.v1	1.16659	0.121623	3.7324e-16	-3.23614	down	--	--	Cellular Component: integral component of membrane (GO:0016021);;	--	--	--	--	--	--	--	--	hypothetical protein GLYMA_15G222900 [Glycine max]
Glyma.15G111400.Wm82.a2.v1	1.23873	0.306875	4.27435e-06	-1.96014	down	--	--	Biological Process: response to acid chemical (GO:0001101);; Molecular Function: molecular_function (GO:0003674);; Molecular Function: binding (GO:0005488);; Molecular Function: protein binding (GO:0005515);; Cellular Component: cellular_component (GO:0005575);; Cellular Component: intracellular (GO:0005622);; Cellular Component: cell (GO:0005623);; Cellular Component: cytoplasm (GO:0005737);; Bi…	--	--	--	--	RbcX protein	Chaperonin-like RBCX protein 1, chloroplastic OS=Arabidopsis thaliana OX=3702 GN=RBCX1 PE=1 SV=1	S	Function unknown	chaperonin-like RBCX protein 1, chloroplastic [Glycine soja]
Glyma.05G010500.Wm82.a2.v1	25.3468	11.4607	0.0015468	-1.09509	down	--	--	--	--	--	--	--	--	--	--	--	uncharacterized protein LOC100306235 [Glycine max]
Glyma.17G105400.Wm82.a2.v1	0.527896	1.28496	0.000107668	1.32372	up	--	--	--	--	--	--	--	--	--	--	--	uncharacterized protein LOC100819771 [Glycine max]
Glyma.12G229000.Wm82.a2.v1	1.53147	3.41065	1.25985e-08	1.19502	up	[MDT]	Cell wall/membrane/envelope biogenesis;; Cell cycle control, cell division, chromosome partitioning;; Signal transduction mechanisms	Molecular Function: ATP binding (GO:0005524);;	K08900|7.8e-250|gmx:100778503|K08900 mitochondrial chaperone BCS1 | (RefSeq) AAA-ATPase At3g50940	--	[O]	Posttranslational modification, protein turnover, chaperones	Domain associated at C-terminal with AAA	AAA-ATPase At3g50940 OS=Arabidopsis thaliana OX=3702 GN=At3g50940 PE=2 SV=1	O	Posttranslational modification, protein turnover, chaperones	AAA-ATPase At3g50940 [Glycine max]
Glyma.08G140500.Wm82.a2.v1	15.0088	7.17284	1.96186e-14	-1.02553	down	[QV]	Secondary metabolites biosynthesis, transport and catabolism;; Defense mechanisms	Molecular Function: iron ion binding (GO:0005506);; Cellular Component: membrane (GO:0016020);; Molecular Function: oxidoreductase activity, acting on paired donors, with incorporation or reduction of molecular oxygen, NAD(P)H as one donor, and incorporation of one atom of oxygen (GO:0016709);; Molecular Function: heme binding (GO:0020037);;	K20562|3.6e-240|ccaj:109816364|K20562 biphenyl-4-hydroxylase | (RefSeq) cytochrome P450 CYP736A12-like isoform X1	--	[Q]	Secondary metabolites biosynthesis, transport and catabolism	Cytochrome P450	Cytochrome P450 71AU50 OS=Prunus mume OX=102107 GN=CYP71AU50 PE=2 SV=1	Q	Secondary metabolites biosynthesis, transport and catabolism	cytochrome P450 CYP736A12 [Glycine max]
Glyma.01G239600.Wm82.a2.v1	12.376	25.7281	1.14036e-08	1.08777	up	[I]	Lipid transport and metabolism	Molecular Function: hydrolase activity (GO:0016787);;	K13258|5.4e-189|gmx:547489|K13258 2-hydroxyisoflavanone dehydratase [EC:4.2.1.105] | (RefSeq) HIDH; 2-hydroxyisoflavanone dehydratase	Isoflavonoid biosynthesis (ko00943)	[V]	Defense mechanisms	alpha/beta hydrolase fold	2-hydroxyisoflavanone dehydratase OS=Glycine max OX=3847 GN=HIDH PE=1 SV=1	V	Defense mechanisms	2-hydroxyisoflavanone dehydratase [Glycine max]
Glyma.14G061300.Wm82.a2.v1	1.71231	0.463476	9.82105e-07	-1.85025	down	--	--	Cellular Component: integral component of membrane (GO:0016021);;	--	--	--	--	--	--	--	--	uncharacterized protein LOC100781766 isoform X1 [Glycine max]
Glyma.11G099600.Wm82.a2.v1	7.57174	2.29592	5.76455e-25	-1.67671	down	[E]	Amino acid transport and metabolism	Molecular Function: serine-type carboxypeptidase activity (GO:0004185);; Cellular Component: vacuole (GO:0005773);; Biological Process: proteolysis involved in cellular protein catabolic process (GO:0051603);;	K16297|5.8e-280|gmx:100807887|K16297 serine carboxypeptidase-like clade II [EC:3.4.16.-] | (RefSeq) serine carboxypeptidase-like 34	--	[OE]	Posttranslational modification, protein turnover, chaperones;; Amino acid transport and metabolism	Serine carboxypeptidase	Serine carboxypeptidase-like 34 OS=Arabidopsis thaliana OX=3702 GN=SCPL34 PE=2 SV=2	--	--	hypothetical protein GLYMA_11G099600 [Glycine max]
Glyma.13G247500.Wm82.a2.v1	0.910226	3.62437	7.5783e-09	1.99879	up	--	--	--	--	--	--	--	--	--	--	--	hypothetical protein GLYMA_13G247500 [Glycine max]
Glyma.14G012100.Wm82.a2.v1	0.750484	1.84067	1.01558e-05	1.32496	up	--	--	Molecular Function: nucleotide-sugar transmembrane transporter activity (GO:0005338);; Molecular Function: UDP-xylose transmembrane transporter activity (GO:0005464);; Cellular Component: Golgi apparatus (GO:0005794);; Molecular Function: antiporter activity (GO:0015297);; Cellular Component: integral component of membrane (GO:0016021);; Molecular Function: transmembrane transporter activity (GO:…	K15285|1.5e-36|vvi:100262066|K15285 solute carrier family 35, member E3 | (RefSeq) uncharacterized membrane protein At1g06890	--	[GE]	Carbohydrate transport and metabolism;; Amino acid transport and metabolism	Triose-phosphate Transporter family	Nucleotide-sugar uncharacterized transporter 2 OS=Arabidopsis thaliana OX=3702 GN=At5g55950 PE=2 SV=1	--	--	nucleotide-sugar uncharacterized transporter 2 [Glycine max]
Glyma.12G110000.Wm82.a2.v1	11.8303	4.53723	0.00179125	-1.35251	down	--	--	--	--	--	--	--	--	--	--	--	hypothetical protein GLYMA_12G110000 [Glycine max]
Glyma.18G123100.Wm82.a2.v1	0.446853	1.25342	0.000588385	1.5054	up	--	--	Molecular Function: protein dimerization activity (GO:0046983);;	--	--	--	--	Helix-loop-helix DNA-binding domain	Transcription factor PRE6 OS=Arabidopsis thaliana OX=3702 GN=PRE6 PE=1 SV=1	K	Transcription	transcription factor PRE6 [Glycine max]
Glyma.16G220600.Wm82.a2.v1	0.143698	0.736676	1.05159e-08	2.28965	up	--	--	--	--	--	--	--	--	--	--	--	mucin-5AC [Glycine max]
Glyma.11G000600.Wm82.a2.v1	2.16268	7.04244	1.14299e-14	1.7263	up	--	--	--	K13466|1.5e-08|pxb:103943541|K13466 EIX receptor 1/2 | (RefSeq) probable leucine-rich repeat receptor-like protein kinase At5g63930	Plant-pathogen interaction (ko04626)	--	--	Leucine rich repeat	Uncharacterized protein At4g06744 OS=Arabidopsis thaliana OX=3702 GN=At4g06744 PE=2 SV=1	S	Function unknown	uncharacterized protein At4g06744 [Glycine max]
Glyma.06G221300.Wm82.a2.v1	15.7228	7.57022	1.3192e-11	-1.02988	down	--	--	Molecular Function: purine nucleoside transmembrane transporter activity (GO:0015211);; Cellular Component: integral component of membrane (GO:0016021);;	K00850|2.6e-14|cpap:110822059|K00850 6-phosphofructokinase 1 [EC:2.7.1.11] | (RefSeq) ATP-dependent 6-phosphofructokinase 6-like	Glycolysis / Gluconeogenesis (ko00010);; Pentose phosphate pathway (ko00030);; Fructose and mannose metabolism (ko00051);; Galactose metabolism (ko00052);; Carbon metabolism (ko01200);; Biosynthesis of amino acids (ko01230);; RNA degradation (ko03018)	--	--	Purine nucleobase transmembrane transport	Probable purine permease 5 OS=Arabidopsis thaliana OX=3702 GN=PUP5 PE=3 SV=2	S	Function unknown	probable purine permease 5 isoform X1 [Glycine max]
Glyma.08G140200.Wm82.a2.v1	1.7444	0.673076	0.000539983	-1.35577	down	[E]	Amino acid transport and metabolism	Molecular Function: transaminase activity (GO:0008483);; Molecular Function: pyridoxal phosphate binding (GO:0030170);;	K00827|1.2e-280|gmx:100780526|K00827 alanine-glyoxylate transaminase / (R)-3-amino-2-methylpropionate-pyruvate transaminase [EC:2.6.1.44 2.6.1.40] | (RefSeq) alanine--glyoxylate aminotransferase 2 homolog 1, mitochondrial isoform X2	Alanine, aspartate and glutamate metabolism (ko00250);; Glycine, serine and threonine metabolism (ko00260);; Cysteine and methionine metabolism (ko00270);; Valine, leucine and isoleucine degradation (ko00280)	[E]	Amino acid transport and metabolism	Aminotransferase class-III	Alanine--glyoxylate aminotransferase 2 homolog 1, mitochondrial OS=Arabidopsis thaliana OX=3702 GN=AGT2 PE=1 SV=1	E	Amino acid transport and metabolism	alanine--glyoxylate aminotransferase 2 homolog 1, mitochondrial isoform X2 [Glycine max]
Glyma.11G148100.Wm82.a2.v1	6.54428	14.6269	4.06179e-13	1.20036	up	--	--	Cellular Component: plasma membrane (GO:0005886);; Biological Process: plant-type secondary cell wall biogenesis (GO:0009834);;	--	--	--	--	Fasciclin domain	Fasciclin-like arabinogalactan protein 12 OS=Arabidopsis thaliana OX=3702 GN=FLA12 PE=2 SV=2	S	Function unknown	LOW QUALITY PROTEIN: hypothetical protein GLYMA_11G148100 [Glycine max]
Glyma.05G094400.Wm82.a2.v1	2.01628	0.812549	0.0131036	-1.23816	down	[D]	Cell cycle control, cell division, chromosome partitioning	Molecular Function: protein serine/threonine kinase activity (GO:0004674);; Molecular Function: ATP binding (GO:0005524);; Cellular Component: cytoplasm (GO:0005737);; Biological Process: regulation of mitotic cell cycle (GO:0007346);; Biological Process: signal transduction by protein phosphorylation (GO:0023014);; Biological Process: stress-activated protein kinase signaling cascade (GO:0031098…	K20716|2.7e-69|crb:17880297|K20716 mitogen-activated protein kinase kinase kinase 17/18 | (RefSeq) mitogen-activated protein kinase kinase kinase 18	MAPK signaling pathway - plant (ko04016)	[T]	Signal transduction mechanisms	Protein kinase domain	Mitogen-activated protein kinase kinase kinase 20 OS=Arabidopsis thaliana OX=3702 GN=MAPKKK20 PE=1 SV=1	T	Signal transduction mechanisms	mitogen-activated protein kinase kinase kinase 17 [Glycine max]
Glyma.14G195300.Wm82.a2.v1	1.74149	0.71705	0.0351443	-1.22244	down	[T]	Signal transduction mechanisms	Molecular Function: protein serine/threonine kinase activity (GO:0004674);; Molecular Function: ATP binding (GO:0005524);; Cellular Component: cytoplasm (GO:0005737);; Biological Process: regulation of mitotic cell cycle (GO:0007346);; Cellular Component: integral component of membrane (GO:0016021);; Biological Process: signal transduction by protein phosphorylation (GO:0023014);; Biological Proc…	K20716|2.0e-57|qsu:112039629|K20716 mitogen-activated protein kinase kinase kinase 17/18 | (RefSeq) mitogen-activated protein kinase kinase kinase 18-like	MAPK signaling pathway - plant (ko04016)	[T]	Signal transduction mechanisms	Protein kinase domain	Mitogen-activated protein kinase kinase kinase 17 OS=Arabidopsis thaliana OX=3702 GN=MAPKKK17 PE=1 SV=1	T	Signal transduction mechanisms	mitogen-activated protein kinase kinase kinase 18 [Glycine max]
Glyma.18G250700.Wm82.a2.v1	0.885979	1.87538	6.51294e-05	1.10444	up	[O]	Posttranslational modification, protein turnover, chaperones	Molecular Function: serine-type endopeptidase activity (GO:0004252);;	K13199|4.9e-66|mtr:MTR_7g081660|K13199 plasminogen activator inhibitor 1 RNA-binding protein | (RefSeq) nuclear RNA-binding-like protein	--	--	--	Subtilase family	Subtilisin-like protease Glyma18g48580 OS=Glycine max OX=3847 GN=Glyma18g48580 PE=1 SV=3	--	--	RecName: Full=Subtilisin-like protease Glyma18g48580; Contains: RecName: Full=Subtilase peptide GmSubPep; AltName: Full=Glycine max subtilase peptide; Short=GmSubPep; Flags: Precursor [Glycine max]
Glyma.14G073500.Wm82.a2.v1	1.88441	3.67153	7.07201e-07	1.00093	up	--	--	Molecular Function: molecular_function (GO:0003674);; Molecular Function: transcription factor activity, sequence-specific DNA binding (GO:0003700);; Molecular Function: binding (GO:0005488);; Molecular Function: protein binding (GO:0005515);; Molecular Function: phospholipid binding (GO:0005543);; Biological Process: regulation of transcription, DNA-templated (GO:0006355);; Biological Process: m…	K19600|3.0e-46|mis:MICPUN_63330|K19600 tubby-related protein 1 | (RefSeq) tubby-like protein	--	[R]	General function prediction only	Tub family	Tubby-like F-box protein 5 OS=Oryza sativa subsp. japonica OX=39947 GN=TULP5 PE=2 SV=1	S	Function unknown	tubby-like F-box protein 5 [Glycine max]
Glyma.07G034900.Wm82.a2.v1	60.2098	16.3778	8.27372e-16	-1.83601	down	--	--	Molecular Function: oxidoreductase activity, acting on single donors with incorporation of molecular oxygen, incorporation of two atoms of oxygen (GO:0016702);; Biological Process: oxylipin biosynthetic process (GO:0031408);; Biological Process: lipid oxidation (GO:0034440);; Molecular Function: metal ion binding (GO:0046872);;	K15718|0.0e+00|gmx:100802459|K15718 linoleate 9S-lipoxygenase [EC:1.13.11.58] | (RefSeq) linoleate 9S-lipoxygenase 1	Linoleic acid metabolism (ko00591)	--	--	Lipoxygenase	Linoleate 9S-lipoxygenase 1 OS=Phaseolus vulgaris OX=3885 GN=LOXA PE=3 SV=1	E	Amino acid transport and metabolism	linoleate 9S-lipoxygenase 1 [Glycine max]
Glyma.17G224800.Wm82.a2.v1	10.0773	24.9114	1.67258e-13	1.34372	up	--	--	Molecular Function: transcription factor activity, sequence-specific DNA binding (GO:0003700);; Cellular Component: nucleus (GO:0005634);; Molecular Function: sequence-specific DNA binding (GO:0043565);;	K12835|8.2e-24|cmax:111493042|K12835 ATP-dependent RNA helicase DDX42 [EC:3.6.4.13] | (RefSeq) DEAD-box ATP-dependent RNA helicase 24 isoform X1	Spliceosome (ko03040)	--	--	WRKY DNA -binding domain	Probable WRKY transcription factor 50 OS=Arabidopsis thaliana OX=3702 GN=WRKY50 PE=2 SV=1	K	Transcription	probable WRKY transcription factor 50 isoform X1 [Glycine max]
Glyma.18G004300.Wm82.a2.v1	0.53211	1.04999	0.0161333	1.01959	up	--	--	Molecular Function: Rho GDP-dissociation inhibitor activity (GO:0005094);; Cellular Component: cytosol (GO:0005829);; Biological Process: Rho protein signal transduction (GO:0007266);; Cellular Component: membrane (GO:0016020);; Molecular Function: Rac GTPase binding (GO:0048365);;	K12462|9.4e-125|gmx:100797593|K12462 Rho GDP-dissociation inhibitor | (RefSeq) uncharacterized protein LOC100797593	--	[T]	Signal transduction mechanisms	RHO protein GDP dissociation inhibitor	Rho GDP-dissociation inhibitor 1 OS=Arabidopsis thaliana OX=3702 GN=GDI1 PE=1 SV=1	T	Signal transduction mechanisms	rho GDP-dissociation inhibitor 1-like [Glycine soja]
Glyma.03G253600.Wm82.a2.v1	7.58665	0.636254	9.61644e-24	-3.53938	down	--		Molecular Function: transmembrane receptor protein serine/threonine kinase activity (GO:0004675);; Molecular Function: ATP binding (GO:0005524);; Cellular Component: plasma membrane (GO:0005886);; Biological Process: protein phosphorylation (GO:0006468);;	K13418|1.1e-49|sita:101768859|K13418 somatic embryogenesis receptor kinase 1 [EC:2.7.10.1 2.7.11.1] | (RefSeq) LRR receptor kinase SERK2	--	[T]	Signal transduction mechanisms	Protein kinase domain	Probable receptor-like protein kinase At2g42960 OS=Arabidopsis thaliana OX=3702 GN=At2g42960 PE=3 SV=1	T	Signal transduction mechanisms	hypothetical protein GLYMA_03G253600 [Glycine max]
Glyma.01G190900.Wm82.a2.v1	0.955902	3.50337	2.2439e-11	1.89766	up	--	--	Biological Process: reproduction (GO:0000003);; Biological Process: developmental process involved in reproduction (GO:0003006);; Cellular Component: cellular_component (GO:0005575);; Cellular Component: cell (GO:0005623);; Cellular Component: plasma membrane (GO:0005886);; Biological Process: cell cycle (GO:0007049);; Biological Process: multicellular organism development (GO:0007275);; Biologic…	--	--	--	--	--	--	S	Function unknown	lysine-rich arabinogalactan protein 18 [Glycine max]
Glyma.15G203500.Wm82.a2.v1	2.1436	6.32047	0.000122345	1.57998	up	[QV]	Secondary metabolites biosynthesis, transport and catabolism;; Defense mechanisms	Molecular Function: iron ion binding (GO:0005506);; Cellular Component: membrane (GO:0016020);; Cellular Component: integral component of membrane (GO:0016021);; Molecular Function: oxidoreductase activity, acting on paired donors, with incorporation or reduction of molecular oxygen, NAD(P)H as one donor, and incorporation of one atom of oxygen (GO:0016709);; Molecular Function: heme binding (GO:…	K23136|3.0e-152|gra:105769156|K23136 fraxetin 5-hydroxylase [EC:1.14.14.164] | (RefSeq) uncharacterized LOC105769156	--	[Q]	Secondary metabolites biosynthesis, transport and catabolism	Cytochrome P450	Cytochrome P450 82A2 OS=Glycine max OX=3847 GN=CYP82A2 PE=2 SV=1	Q	Secondary metabolites biosynthesis, transport and catabolism	cytochrome P450 82A2 [Glycine max]
Glyma.02G209000.Wm82.a2.v1	1.92239	13.0082	4.17585e-37	2.77517	up	--	--	Biological Process: response to reactive oxygen species (GO:0000302);; Molecular Function: peroxidase activity (GO:0004601);; Cellular Component: chloroplast (GO:0009507);; Cellular Component: chloroplast thylakoid membrane (GO:0009535);; Molecular Function: heme binding (GO:0020037);; Biological Process: cellular response to oxidative stress (GO:0034599);; Biological Process: hydrogen peroxide c…	K00434|5.9e-197|gmx:100799504|K00434 L-ascorbate peroxidase [EC:1.11.1.11] | (RefSeq) thylakoid lumenal 29 kDa protein, chloroplastic isoform X1	Ascorbate and aldarate metabolism (ko00053);; Glutathione metabolism (ko00480)	--	--	Peroxidase	Thylakoid lumenal 29 kDa protein, chloroplastic OS=Solanum lycopersicum OX=4081 GN=CLEB3J9 PE=3 SV=1	S	Function unknown	thylakoid lumenal 29 kDa protein, chloroplastic isoform X1 [Glycine max]
Glyma.18G229800.Wm82.a2.v1	11.5289	24.215	9.84994e-12	1.1036	up	--	--	Molecular Function: phosphomannomutase activity (GO:0004615);; Cellular Component: cytoplasm (GO:0005737);; Biological Process: GDP-mannose biosynthetic process (GO:0009298);;	K17497|7.2e-141|gmx:732605|K17497 phosphomannomutase [EC:5.4.2.8] | (RefSeq) phosphomannomutase	Fructose and mannose metabolism (ko00051);; Amino sugar and nucleotide sugar metabolism (ko00520)	[I]	Lipid transport and metabolism	Eukaryotic phosphomannomutase	Phosphomannomutase OS=Glycine max OX=3847 PE=2 SV=1	I	Lipid transport and metabolism	phosphomannomutase [Glycine max]
Glyma.14G151600.Wm82.a2.v1	2.92115	0.146126	1.86347e-39	-4.22728	down	--	--	Cellular Component: plasma membrane (GO:0005886);; Cellular Component: integral component of membrane (GO:0016021);; Molecular Function: transmembrane transporter activity (GO:0022857);;	K17500|1.1e-60|nto:104085001|K17500 integrin-linked kinase-associated serine/threonine phosphatase 2C [EC:3.1.3.16] | (RefSeq) WAT1-related protein At3g18200 isoform X1	--	--	--	EamA-like transporter family	WAT1-related protein At4g08290 OS=Arabidopsis thaliana OX=3702 GN=At4g08290 PE=2 SV=1	S	Function unknown	WAT1-related protein At4g08290 [Glycine max]
Glyma.15G264200.Wm82.a2.v1	6.38606	20.1651	1.32037e-09	1.68458	up	[IR]	Lipid transport and metabolism;; General function prediction only	Cellular Component: vacuolar membrane (GO:0005774);; Molecular Function: lipase activity (GO:0016298);;	K00679|2.6e-33|cic:CICLE_v10027727mg|K00679 phospholipid:diacylglycerol acyltransferase [EC:2.3.1.158] | (RefSeq) hypothetical protein	Glycerolipid metabolism (ko00561)	--	--	GDSL-like Lipase/Acylhydrolase	GDSL esterase/lipase 5 OS=Arabidopsis thaliana OX=3702 GN=GLIP5 PE=2 SV=2	S	Function unknown	GDSL esterase/lipase 5 isoform X1 [Glycine max]
Glyma.19G199300.Wm82.a2.v1	4.72662	0.994691	0.00130251	-2.1757	down	[L]	Replication, recombination and repair	Molecular Function: ubiquitin-protein transferase activity (GO:0004842);; Molecular Function: ligase activity (GO:0016874);;	K17592|2.3e-06|mpp:MICPUCDRAFT_51162|K17592 sacsin | (RefSeq) hypothetical protein	--	--	--	U-box domain	E3 ubiquitin-protein ligase PUB22 OS=Arabidopsis thaliana OX=3702 GN=PUB22 PE=1 SV=1	H	Coenzyme transport and metabolism	E3 ubiquitin-protein ligase PUB22 [Glycine max]
Glyma.06G205400.Wm82.a2.v1	2.28461	8.90095	3.44144e-33	1.99583	up	--	--	Biological Process: plant-type cell wall organization (GO:0009664);; Biological Process: plant-type cell wall biogenesis (GO:0009832);; Biological Process: cellulose microfibril organization (GO:0010215);; Cellular Component: integral component of membrane (GO:0016021);; Cellular Component: anchored component of plasma membrane (GO:0046658);; Biological Process: plant-type cell wall cellulose bio…	--	--	--	--	COBRA-like protein	Protein COBRA OS=Arabidopsis thaliana OX=3702 GN=COB PE=2 SV=1	S	Function unknown	protein COBRA [Glycine max]
Glyma.04G134100.Wm82.a2.v1	8.25113	1.69582	5.08238e-22	-2.23051	down	--	--	--	--	--	[I]	Lipid transport and metabolism	--	Phosphatidylinositol/phosphatidylcholine transfer protein SFH10 OS=Arabidopsis thaliana OX=3702 GN=SFH10 PE=3 SV=1	--	--	hypothetical protein GLYMA_04G134100 [Glycine max]
Glyma.13G150700.Wm82.a2.v1	0.354935	1.12425	6.09279e-07	1.69367	up	[N]	Cell motility	Cellular Component: Golgi apparatus (GO:0005794);; Cellular Component: integral component of membrane (GO:0016021);; Molecular Function: transferase activity, transferring glycosyl groups (GO:0016757);; Molecular Function: mannan synthase activity (GO:0051753);;	K13680|9.3e-300|gmx:100808118|K13680 beta-mannan synthase [EC:2.4.1.32] | (RefSeq) glucomannan 4-beta-mannosyltransferase 9	--	--	--	Glycosyltransferase like family 2	Glucomannan 4-beta-mannosyltransferase 9 OS=Arabidopsis thaliana OX=3702 GN=CSLA9 PE=1 SV=1	M	Cell wall/membrane/envelope biogenesis	glucomannan 4-beta-mannosyltransferase 9 [Glycine max]
Glyma.06G030900.Wm82.a2.v1	19.0668	62.4515	4.35262e-33	1.75088	up	[R]	General function prediction only	Cellular Component: cellular_component (GO:0005575);; Cellular Component: cell (GO:0005623);; Cellular Component: plasma membrane (GO:0005886);; Biological Process: response to stress (GO:0006950);; Biological Process: response to oxidative stress (GO:0006979);; Biological Process: biological_process (GO:0008150);; Biological Process: response to inorganic substance (GO:0010035);; Biological Proc…	K23050|2.8e-174|gmx:100813308|K23050 phenylcoumaran benzylic ether reductase [EC:1.3.1.-] | (RefSeq) isoflavone reductase-like protein	--	--	--	NmrA-like family	Phenylcoumaran benzylic ether reductase Betv6 OS=Betula pendula OX=3505 GN=BETV6 PE=1 SV=1	S	Function unknown	isoflavone reductase-like protein [Glycine max]
Glyma.13G086000.Wm82.a2.v1	8.59266	4.17312	5.28321e-10	-1.00267	down	[M]	Cell wall/membrane/envelope biogenesis	Molecular Function: protein binding (GO:0005515);;	--	--	[R]	General function prediction only	Kelch motif	F-box/kelch-repeat protein At1g22040 OS=Arabidopsis thaliana OX=3702 GN=At1g22040 PE=2 SV=1	S	Function unknown	F-box/kelch-repeat protein At1g22040 [Glycine max]
Glyma.04G063800.Wm82.a2.v1	5.14034	13.3678	5.82022e-20	1.41526	up	[N]	Cell motility	Cellular Component: Golgi apparatus (GO:0005794);; Cellular Component: trans-Golgi network (GO:0005802);; Cellular Component: plasma membrane (GO:0005886);; Biological Process: plant-type primary cell wall biogenesis (GO:0009833);; Cellular Component: integral component of membrane (GO:0016021);; Molecular Function: cellulose synthase activity (GO:0016759);; Molecular Function: cellulose synthase…	K10999|0.0e+00|gmx:100784207|K10999 cellulose synthase A [EC:2.4.1.12] | (RefSeq) cellulose synthase A catalytic subunit 8 [UDP-forming]	--	--	--	Cellulose synthase	Cellulose synthase A catalytic subunit 8 [UDP-forming] OS=Arabidopsis thaliana OX=3702 GN=CESA8 PE=1 SV=1	G	Carbohydrate transport and metabolism	cellulose synthase A catalytic subunit 8 [UDP-forming] [Glycine max]
Glyma.09G053400.Wm82.a2.v1	1.09314	3.00877	9.76585e-15	1.49874	up	--	--	Cellular Component: membrane (GO:0016020);; Cellular Component: integral component of membrane (GO:0016021);;	K20890|2.4e-43|oeu:111370894|K20890 xylan alpha-glucuronosyltransferase [EC:2.4.1.-] | (RefSeq) UDP-glucuronate:xylan alpha-glucuronosyltransferase 1-like	--	[R]	General function prediction only	Domain of unknown function	--	S	Function unknown	uncharacterized protein LOC100808366 [Glycine max]
Glyma.04G056600.Wm82.a2.v1	0.917025	0.460557	0.00745839	-1.02573	down	--	--	Molecular Function: G-protein coupled receptor binding (GO:0001664);; Molecular Function: GTPase activity (GO:0003924);; Molecular Function: GTP binding (GO:0005525);; Cellular Component: heterotrimeric G-protein complex (GO:0005834);; Biological Process: adenylate cyclase-modulating G-protein coupled receptor signaling pathway (GO:0007188);; Molecular Function: G-protein beta/gamma-subunit compl…	K19729|1.3e-218|gmx:547804|K19729 guanine nucleotide-binding protein G(t) subunit alpha 3 | (RefSeq) GPA1; guanine nucleotide-binding protein alpha-1 subunit	--	[DT]	Cell cycle control, cell division, chromosome partitioning;; Signal transduction mechanisms	G-protein alpha subunit	Guanine nucleotide-binding protein alpha-1 subunit OS=Glycine max OX=3847 GN=GPA1 PE=2 SV=1	--	--	guanine nucleotide-binding protein alpha-1 subunit [Glycine max]
Glyma.01G175300.Wm82.a2.v1	1.70165	3.93289	4.94199e-14	1.24756	up	[S]	Function unknown	Molecular Function: DNA binding (GO:0003677);; Molecular Function: ATP binding (GO:0005524);; Cellular Component: nucleus (GO:0005634);; Molecular Function: DNA-dependent ATPase activity (GO:0008094);; Biological Process: regulation of DNA methylation (GO:0044030);;	K19001|0.0e+00|gmx:100777687|K19001 ATP-dependent DNA helicase | (RefSeq) ATP-dependent DNA helicase DDM1	--	[K]	Transcription	SNF2 family N-terminal domain	ATP-dependent DNA helicase DDM1 OS=Arabidopsis thaliana OX=3702 GN=DDM1 PE=1 SV=1	K	Transcription	ATP-dependent DNA helicase DDM1 [Glycine max]
Glyma.14G115500.Wm82.a2.v1	44.297	174.512	1.61737e-12	2.01864	up	--	--	--	K11855|9.7e-17|bvg:104906049|K11855 ubiquitin carboxyl-terminal hydrolase 36/42 [EC:3.4.19.12] | (RefSeq) ubiquitin carboxyl-terminal hydrolase 36	--	--	--	Hydrophobic seed protein	14 kDa proline-rich protein DC2.15 OS=Daucus carota OX=4039 PE=2 SV=1	S	Function unknown	proline-rich protein precursor [Glycine max]
Glyma.13G048800.Wm82.a2.v1	0.487324	1.0237	0.00898936	1.06567	up	[G]	Carbohydrate transport and metabolism	Molecular Function: glucan endo-1,3-beta-glucanase activity, C-3 substituted reducing group (GO:0052861);;	K01180|0.0e+00|gmx:100776030|K01180 endo-1,3(4)-beta-glucanase [EC:3.2.1.6] | (RefSeq) probable endo-1,3(4)-beta-glucanase ARB_01444	--	[G]	Carbohydrate transport and metabolism	Glycosyl hydrolase family 81 C-terminal domain	--	G	Carbohydrate transport and metabolism	probable endo-1,3(4)-beta-glucanase ARB_01444 [Glycine soja]
Glyma.10G224600.Wm82.a2.v1	0.0821403	0.225488	0.000186951	1.43676	up	--	--	--	--	--	--	--	--	--	--	--	hypothetical protein GLYMA_10G224600 [Glycine max]
Glyma.12G217300.Wm82.a2.v1	1.95236	3.89062	0.00202534	1.02385	up	--	--	--	--	--	--	--	BURP domain	Embryonic abundant protein USP92 OS=Vicia faba OX=3906 PE=2 SV=1	S	Function unknown	sali5-4a protein precursor [Glycine max]
Glyma.07G071300.Wm82.a2.v1	5.44183	2.30165	1.69564e-08	-1.1905	down	[I]	Lipid transport and metabolism	Biological Process: acyl-CoA metabolic process (GO:0006637);; Biological Process: fatty acid catabolic process (GO:0009062);; Molecular Function: acyl-CoA hydrolase activity (GO:0047617);;	K01068|1.2e-255|gmx:100797680|K01068 acyl-coenzyme A thioesterase 1/2/4 [EC:3.1.2.2] | (RefSeq) uncharacterized protein LOC100797680 isoform X2	Fatty acid elongation (ko00062);; Biosynthesis of unsaturated fatty acids (ko01040)	[I]	Lipid transport and metabolism	Thioesterase-like superfamily	--	I	Lipid transport and metabolism	uncharacterized protein LOC100797680 isoform X2 [Glycine max]
Glyma.04G069500.Wm82.a2.v1	0.624603	1.89077	5.03648e-10	1.57312	up	--	--	Molecular Function: inorganic anion exchanger activity (GO:0005452);; Cellular Component: integral component of membrane (GO:0016021);; Biological Process: borate transport (GO:0046713);; Molecular Function: borate efflux transmembrane transporter activity (GO:0080139);;	K24194|0.0e+00|gmx:100787412|K24194 boron transporter | (RefSeq) boron transporter 4	--	[P]	Inorganic ion transport and metabolism	HCO3- transporter family	Boron transporter 4 OS=Arabidopsis thaliana OX=3702 GN=BOR4 PE=2 SV=1	P	Inorganic ion transport and metabolism	boron transporter 4 [Glycine max]
Glyma.03G204500.Wm82.a2.v1	1.75409	0.723214	8.79558e-06	-1.24125	down	--	--	--	--	--	--	--	--	--	--	--	uncharacterized protein LOC102660779 [Glycine max]
Glyma.09G231900.Wm82.a2.v1	67.1875	143.151	1.32296e-16	1.1281	up	--	--	Molecular Function: enzyme inhibitor activity (GO:0004857);; Biological Process: negative regulation of catalytic activity (GO:0043086);;	K01051|1.2e-11|zju:107409699|K01051 pectinesterase [EC:3.1.1.11] | (RefSeq) pectinesterase 3-like	Pentose and glucuronate interconversions (ko00040)	--	--	Plant invertase/pectin methylesterase inhibitor	21 kDa protein OS=Daucus carota OX=4039 PE=2 SV=1	S	Function unknown	plant invertase/pectin methylesterase inhibitor-domain containing protein precursor [Glycine max]
Glyma.01G168400.Wm82.a2.v1	4.34316	9.42879	0.000732749	1.1478	up	[Q]	Secondary metabolites biosynthesis, transport and catabolism	--	--	--	--	--	Glyoxalase/Bleomycin resistance protein/Dioxygenase superfamily	--	S	Function unknown	putative lactoylglutathione lyase [Glycine max]
Glyma.13G170600.Wm82.a2.v1	0.69637	0.191252	1.53579e-07	-1.77805	down	[C]	Energy production and conversion	Molecular Function: aldehyde dehydrogenase (NAD) activity (GO:0004029);;	K00128|0.0e+00|gmx:100798892|K00128 aldehyde dehydrogenase (NAD+) [EC:1.2.1.3] | (RefSeq) aldehyde dehydrogenase family 2 member B7, mitochondrial isoform X1	Glycolysis / Gluconeogenesis (ko00010);; Ascorbate and aldarate metabolism (ko00053);; Fatty acid degradation (ko00071);; Valine, leucine and isoleucine degradation (ko00280);; Lysine degradation (ko00310);; Arginine and proline metabolism (ko00330);; Histidine metabolism (ko00340);; Tryptophan metabolism (ko00380);; beta-Alanine metabolism (ko00410);; Glycerolipid metabolism (ko00561);; Pyruvate…	[C]	Energy production and conversion	Aldehyde dehydrogenase family	Aldehyde dehydrogenase family 2 member B7, mitochondrial OS=Arabidopsis thaliana OX=3702 GN=ALDH2B7 PE=1 SV=2	C	Energy production and conversion	aldehyde dehydrogenase family 2 member B6 [Glycine max]
Glyma.18G280000.Wm82.a2.v1	0.89898	3.25881	6.44015e-19	1.88496	up	--	--	--	--	--	--	--	--	--	--	--	hypothetical protein GLYMA_18G280000 [Glycine max]
Glyma.13G173100.Wm82.a2.v1	0.845869	2.5496	1.60457e-08	1.62271	up	--	--	Cellular Component: nucleosome (GO:0000786);; Molecular Function: DNA binding (GO:0003677);; Cellular Component: nucleus (GO:0005634);; Molecular Function: protein heterodimerization activity (GO:0046982);;	K11253|1.4e-66|adu:107461485|K11253 histone H3 | (RefSeq) histone H3.2	--	[B]	Chromatin structure and dynamics	Core histone H2A/H2B/H3/H4	Histone H3.2 OS=Medicago sativa OX=3879 GN=H3-1.1 PE=1 SV=2	B	Chromatin structure and dynamics	uncharacterized protein LOC111021800 [Momordica charantia]
Glyma.13G176300.Wm82.a2.v1	3.01429	5.99512	8.84419e-05	1.03148	up	[O]	Posttranslational modification, protein turnover, chaperones	Biological Process: response to reactive oxygen species (GO:0000302);; Biological Process: protein folding (GO:0006457);; Biological Process: response to heat (GO:0009408);; Biological Process: response to salt stress (GO:0009651);; Biological Process: response to hydrogen peroxide (GO:0042542);; Molecular Function: protein self-association (GO:0043621);; Molecular Function: unfolded protein bind…	K13993|5.5e-81|gmx:100499727|K13993 HSP20 family protein | (RefSeq) HSP18.5-C; 18.5 kDa class I heat shock protein	Protein processing in endoplasmic reticulum (ko04141)	[O]	Posttranslational modification, protein turnover, chaperones	Hsp20/alpha crystallin family	18.5 kDa class I heat shock protein OS=Glycine max OX=3847 GN=HSP18.5-C PE=3 SV=1	O	Posttranslational modification, protein turnover, chaperones	18.5 kDa class I heat shock protein [Glycine soja]
Glyma.18G285000.Wm82.a2.v1	0.408319	0.940389	0.00622994	1.12607	up	[R]	General function prediction only	Cellular Component: cytoplasm (GO:0005737);; Molecular Function: hydrolase activity (GO:0016787);; Molecular Function: carboxy-lyase activity (GO:0016831);; Biological Process: secondary metabolic process (GO:0019748);;	--	--	--	--	Amidohydrolase	--	S	Function unknown	uncharacterized protein LOC100817481 [Glycine max]
Glyma.11G044800.Wm82.a2.v1	0.497369	2.07049	2.1213e-06	2.09115	up	--	--	Molecular Function: hydrolase activity, hydrolyzing O-glycosyl compounds (GO:0004553);; Cellular Component: cell wall (GO:0005618);; Biological Process: xyloglucan metabolic process (GO:0010411);; Cellular Component: integral component of membrane (GO:0016021);; Molecular Function: xyloglucan:xyloglucosyl transferase activity (GO:0016762);; Biological Process: cell wall biogenesis (GO:0042546);; …	K08235|1.1e-180|gmx:100791974|K08235 xyloglucan:xyloglucosyl transferase [EC:2.4.1.207] | (RefSeq) probable xyloglucan endotransglucosylase/hydrolase protein 6	--	--	--	Glycosyl hydrolases family 16	Probable xyloglucan endotransglucosylase/hydrolase protein 6 OS=Arabidopsis thaliana OX=3702 GN=XTH6 PE=2 SV=2	G	Carbohydrate transport and metabolism	probable xyloglucan endotransglucosylase/hydrolase protein 6 [Glycine max]
Glyma.14G117200.Wm82.a2.v1	20.1575	7.91173	6.27302e-23	-1.31085	down	[QV]	Secondary metabolites biosynthesis, transport and catabolism;; Defense mechanisms	Molecular Function: iron ion binding (GO:0005506);; Cellular Component: membrane (GO:0016020);; Cellular Component: integral component of membrane (GO:0016021);; Molecular Function: oxidoreductase activity, acting on paired donors, with incorporation or reduction of molecular oxygen, NAD(P)H as one donor, and incorporation of one atom of oxygen (GO:0016709);; Molecular Function: heme binding (GO:…	K23806|2.8e-166|vvi:100263449|K23806 alpha-guaiene 2-oxidase | (RefSeq) CYP71BE5; premnaspirodiene oxygenase-like	--	[Q]	Secondary metabolites biosynthesis, transport and catabolism	Cytochrome P450	Cytochrome P450 71D11 (Fragment) OS=Lotus japonicus OX=34305 GN=CYP71D11 PE=2 SV=1	Q	Secondary metabolites biosynthesis, transport and catabolism	cytochrome P450 71D11 [Glycine max]
Glyma.12G014400.Wm82.a2.v1	21.7512	45.9146	1.71087e-09	1.11428	up	[M]	Cell wall/membrane/envelope biogenesis	--	--	--	--	--	--	Protein CDI OS=Arabidopsis thaliana OX=3702 GN=CDI PE=2 SV=1	--	--	protein CDI [Glycine max]
Glycine_max_newGene_4005	0.851811	0.370904	0.00776857	-1.24887	down	--	--	Molecular Function: ATP binding (GO:0005524);; Biological Process: defense response (GO:0006952);; Cellular Component: integral component of membrane (GO:0016021);; Molecular Function: ATPase activity (GO:0016887);;	--	--	--	--	--	--	--	--	ABC transporter G family member 27 [Glycine soja]
Glyma.09G054900.Wm82.a2.v1	2.03964	5.07242	1.00097e-12	1.33319	up	--	--	Cellular Component: integral component of membrane (GO:0016021);;	K20890|4.1e-59|oeu:111370894|K20890 xylan alpha-glucuronosyltransferase [EC:2.4.1.-] | (RefSeq) UDP-glucuronate:xylan alpha-glucuronosyltransferase 1-like	--	[R]	General function prediction only	Domain of unknown function	--	S	Function unknown	uncharacterized protein LOC100814269 isoform X1 [Glycine max]
Glyma.15G019800.Wm82.a2.v1	0.085084	0.38206	7.60053e-08	2.16357	up	--		Molecular Function: protein kinase activity (GO:0004672);; Molecular Function: ATP binding (GO:0005524);; Cellular Component: integral component of membrane (GO:0016021);;	K13429|3.2e-79|gmx:100802308|K13429 chitin elicitor receptor kinase 1 | (RefSeq) chitin elicitor receptor kinase 1	Plant-pathogen interaction (ko04626)	--	--	Protein tyrosine and serine/threonine kinase	LysM domain receptor-like kinase 3 OS=Arabidopsis thaliana OX=3702 GN=LYK3 PE=2 SV=1	T	Signal transduction mechanisms	lysM domain receptor-like kinase 3 isoform X1 [Glycine max]
Glyma.13G029200.Wm82.a2.v1	41.4033	111.962	5.61163e-24	1.46875	up	[E]	Amino acid transport and metabolism	Molecular Function: serine-type carboxypeptidase activity (GO:0004185);; Cellular Component: vacuole (GO:0005773);; Biological Process: proteolysis involved in cellular protein catabolic process (GO:0051603);;	K16297|1.2e-293|gmx:100778342|K16297 serine carboxypeptidase-like clade II [EC:3.4.16.-] | (RefSeq) serine carboxypeptidase-like 40	--	[OE]	Posttranslational modification, protein turnover, chaperones;; Amino acid transport and metabolism	Serine carboxypeptidase	Serine carboxypeptidase 1 OS=Medicago truncatula OX=3880 GN=SCP1 PE=1 SV=3	O	Posttranslational modification, protein turnover, chaperones	serine carboxypeptidase-like 40 [Glycine max]
Glyma.08G080600.Wm82.a2.v1	4.37004	10.4392	1.79186e-15	1.28831	up	[C]	Energy production and conversion	Molecular Function: oxidoreductase activity (GO:0016491);; Molecular Function: FAD binding (GO:0071949);;	K22395|3.6e-307|gmx:100813706|K22395 cinnamyl-alcohol dehydrogenase [EC:1.1.1.195] | (RefSeq) berberine bridge enzyme-like 13	Phenylpropanoid biosynthesis (ko00940)	--	--	FAD binding domain	Berberine bridge enzyme-like 13 OS=Arabidopsis thaliana OX=3702 GN=At1g30760 PE=1 SV=1	C	Energy production and conversion	berberine bridge enzyme-like 13 [Glycine max]
Glyma.01G129500.Wm82.a2.v1	2.41064	0.420356	3.75949e-08	-2.44127	down	--	--	--	--	--	--	--	--	--	--	--	hypothetical protein GLYMA_01G129500 [Glycine max]
Glyma.08G344300.Wm82.a2.v1	1.1302	0.298837	0.000216321	-1.87463	down	--	--	Molecular Function: fatty acid binding (GO:0005504);; Biological Process: systemic acquired resistance (GO:0009627);;	--	--	--	--	Probable lipid transfer	--	S	Function unknown	alpha-amylase inhibitor/lipid transfer/seed storage family protein precursor [Glycine max]
Glyma.06G191200.Wm82.a2.v1	2.79161	6.20125	5.78047e-14	1.17956	up	--	--	Molecular Function: protein binding (GO:0005515);; Cellular Component: cellular_component (GO:0005575);; Cellular Component: intracellular (GO:0005622);; Cellular Component: cell (GO:0005623);; Cellular Component: cytoplasm (GO:0005737);; Cellular Component: cytosol (GO:0005829);; Cellular Component: cytoskeleton (GO:0005856);; Cellular Component: microtubule associated complex (GO:0005875);; Cel…	--	--	--	--	Protein of unknown function (DUF4005)	Protein IQ-DOMAIN 31 OS=Arabidopsis thaliana OX=3702 GN=IQD31 PE=1 SV=1	S	Function unknown	protein IQ-DOMAIN 20 [Glycine max]
Glyma.19G237300.Wm82.a2.v1	0.333791	1.56386	1.0412e-08	2.1976	up	--	--	Molecular Function: hydrolase activity, acting on ester bonds (GO:0016788);;	K01206|2.2e-82|thj:104825554|K01206 alpha-L-fucosidase [EC:3.2.1.51] | (RefSeq) alpha-L-fucosidase 3	Other glycan degradation (ko00511)	--	--	GDSL-like Lipase/Acylhydrolase	GDSL esterase/lipase At1g54790 OS=Arabidopsis thaliana OX=3702 GN=At1g54790 PE=2 SV=1	S	Function unknown	hypothetical protein GLYMA_19G237300 [Glycine max]
Glyma.18G269300.Wm82.a2.v1	2.43782	5.19611	4.73346e-07	1.11308	up	--		Molecular Function: protein kinase activity (GO:0004672);; Molecular Function: ATP binding (GO:0005524);; Cellular Component: plasma membrane (GO:0005886);; Cellular Component: plasmodesma (GO:0009506);; Biological Process: protein autophosphorylation (GO:0046777);;	K13435|8.7e-54|sly:101268866|K13435 serine/threonine-protein kinase Pto | (RefSeq) Pto; serine/threonine protein kinase Pto	Plant-pathogen interaction (ko04626)	[T]	Signal transduction mechanisms	Protein tyrosine and serine/threonine kinase	Receptor-like protein kinase ANXUR2 OS=Arabidopsis thaliana OX=3702 GN=ANX2 PE=1 SV=1	T	Signal transduction mechanisms	hypothetical protein GLYMA_18G269300, partial [Glycine max]
Glyma.20G005100.Wm82.a2.v1	0.963952	0.152019	1.34979e-11	-2.53953	down	--	--	--	--	--	--	--	NPH3 family	BTB/POZ domain-containing protein At3g19850 OS=Arabidopsis thaliana OX=3702 GN=At3g19850 PE=2 SV=1	S	Function unknown	BTB/POZ domain-containing protein At3g19850-like [Glycine max]
Glyma.17G012600.Wm82.a2.v1	0.192297	0.627749	4.40285e-06	1.71981	up	[E]	Amino acid transport and metabolism	Molecular Function: prephenate dehydratase activity (GO:0004664);; Cellular Component: cytoplasm (GO:0005737);; Biological Process: L-phenylalanine biosynthetic process (GO:0009094);; Cellular Component: chloroplast (GO:0009507);; Cellular Component: chloroplast stroma (GO:0009570);; Molecular Function: arogenate dehydratase activity (GO:0047769);;	K05359|5.7e-220|gmx:100784846|K05359 arogenate/prephenate dehydratase [EC:4.2.1.91 4.2.1.51] | (RefSeq) arogenate dehydratase/prephenate dehydratase 1, chloroplastic	Phenylalanine, tyrosine and tryptophan biosynthesis (ko00400);; Biosynthesis of amino acids (ko01230)	[E]	Amino acid transport and metabolism	Prephenate dehydratase	Arogenate dehydratase/prephenate dehydratase 1, chloroplastic OS=Arabidopsis thaliana OX=3702 GN=ADT1 PE=1 SV=1	E	Amino acid transport and metabolism	hypothetical protein GLYMA_17G012600 [Glycine max]
Glyma.01G126600.Wm82.a2.v1	10.6745	37.5089	1.53066e-07	1.83703	up	--	--	Cellular Component: apoplast (GO:0048046);;	K01870|1.0e-38|csat:104723377|K01870 isoleucyl-tRNA synthetase [EC:6.1.1.5] | (RefSeq) isoleucine--tRNA ligase, chloroplastic/mitochondrial-like	Aminoacyl-tRNA biosynthesis (ko00970)	--	--	Dirigent-like protein	Dirigent protein 19 OS=Arabidopsis thaliana OX=3702 GN=DIR19 PE=2 SV=1	S	Function unknown	dirigent protein 22 [Glycine max]
Glyma.16G165800.Wm82.a2.v1	120.932	366.111	1.03906e-16	1.6297	up	--	--	Cellular Component: photosystem I (GO:0009522);; Cellular Component: photosystem II (GO:0009523);; Cellular Component: chloroplast thylakoid membrane (GO:0009535);; Biological Process: photosynthesis, light harvesting (GO:0009765);; Cellular Component: integral component of membrane (GO:0016021);; Molecular Function: chlorophyll binding (GO:0016168);; Biological Process: protein-chromophore linka…	K08912|8.2e-151|gmx:100800351|K08912 light-harvesting complex II chlorophyll a/b binding protein 1 | (RefSeq) LHCB1-7; photosystem II type I chlorophyll a/b-binding protein	Photosynthesis - antenna proteins (ko00196)	--	--	Chlorophyll A-B binding protein	Chlorophyll a-b binding protein 3, chloroplastic OS=Glycine max OX=3847 GN=CAB3 PE=3 SV=1	C	Energy production and conversion	photosystem II type I chlorophyll a/b-binding protein [Glycine max]
Glyma.11G236100.Wm82.a2.v1	2.96278	6.32409	9.45327e-05	1.11544	up	[E]	Amino acid transport and metabolism	Molecular Function: peptidyltransferase activity (GO:0000048);; Cellular Component: plasma membrane (GO:0005886);; Biological Process: glutathione catabolic process (GO:0006751);; Molecular Function: glutathione hydrolase activity (GO:0036374);;	K18592|0.0e+00|gmx:100813586|K18592 gamma-glutamyltranspeptidase / glutathione hydrolase / leukotriene-C4 hydrolase [EC:2.3.2.2 3.4.19.13 3.4.19.14] | (RefSeq) glutathione hydrolase 1 isoform X3	Taurine and hypotaurine metabolism (ko00430);; Cyanoamino acid metabolism (ko00460);; Glutathione metabolism (ko00480);; Arachidonic acid metabolism (ko00590)	[E]	Amino acid transport and metabolism	Gamma-glutamyltranspeptidase	Glutathione hydrolase 1 OS=Arabidopsis thaliana OX=3702 GN=GGT1 PE=2 SV=1	E	Amino acid transport and metabolism	hypothetical protein GLYMA_11G236100 [Glycine max]
Glyma.04G102800.Wm82.a2.v1	7.03054	14.9572	1.75055e-10	1.12248	up	[G]	Carbohydrate transport and metabolism	Molecular Function: sugar:proton symporter activity (GO:0005351);; Cellular Component: integral component of plasma membrane (GO:0005887);; Biological Process: glucose import (GO:0046323);;	K24193|2.0e-246|ccaj:109795994|K24193 MFS transporter, SP family, sugar:H+ symporter | (RefSeq) sugar transport protein 5-like	--	[R]	General function prediction only	Sugar (and other) transporter	Sugar transport protein 5 OS=Arabidopsis thaliana OX=3702 GN=STP5 PE=2 SV=1	P	Inorganic ion transport and metabolism	sugar transport protein 5 [Glycine max]
Glyma.04G220600.Wm82.a2.v1	21.3296	3.20615	1.74348e-32	-2.67759	down	--	--	Molecular Function: peroxidase activity (GO:0004601);; Cellular Component: extracellular region (GO:0005576);; Biological Process: response to oxidative stress (GO:0006979);; Molecular Function: heme binding (GO:0020037);; Biological Process: hydrogen peroxide catabolic process (GO:0042744);; Molecular Function: metal ion binding (GO:0046872);;	K00430|3.2e-181|gmx:100803637|K00430 peroxidase [EC:1.11.1.7] | (RefSeq) peroxidase P7	Phenylpropanoid biosynthesis (ko00940)	--	--	Peroxidase	Peroxidase 52 OS=Arabidopsis thaliana OX=3702 GN=PER52 PE=2 SV=1	Q	Secondary metabolites biosynthesis, transport and catabolism	peroxidase P7 [Glycine max]
Glyma.13G282400.Wm82.a2.v1	2.24284	1.04952	0.00508884	-1.02031	down	--	--	--	--	--	--	--	Wound-induced protein	--	S	Function unknown	uncharacterized protein LOC100306608 [Glycine max]
Glyma.11G148200.Wm82.a2.v1	0.202162	0.717731	0.000256899	1.86344	up	--	--	Cellular Component: plasma membrane (GO:0005886);; Biological Process: plant-type secondary cell wall biogenesis (GO:0009834);; Cellular Component: integral component of membrane (GO:0016021);;	--	--	--	--	Fasciclin domain	Fasciclin-like arabinogalactan protein 12 OS=Arabidopsis thaliana OX=3702 GN=FLA12 PE=2 SV=2	--	--	fasciclin-like arabinogalactan protein 12 [Glycine max]
Glyma.03G030400.Wm82.a2.v1	24.433	9.11828	1.01084e-30	-1.38535	down	[QV]	Secondary metabolites biosynthesis, transport and catabolism;; Defense mechanisms	Molecular Function: iron ion binding (GO:0005506);; Cellular Component: membrane (GO:0016020);; Molecular Function: oxidoreductase activity, acting on paired donors, with incorporation or reduction of molecular oxygen, NAD(P)H as one donor, and incorporation of one atom of oxygen (GO:0016709);; Molecular Function: heme binding (GO:0020037);;	K20617|7.1e-188|lja:Lj3g3v1475790.2|K20617 cytochrome P450 family 71 subfamily A | (RefSeq) Lj3g3v1475790.2; -	--	[Q]	Secondary metabolites biosynthesis, transport and catabolism	Cytochrome P450	Cytochrome P450 83B1 OS=Arabidopsis thaliana OX=3702 GN=CYP83B1 PE=1 SV=1	Q	Secondary metabolites biosynthesis, transport and catabolism	cytochrome P450 83B1 [Glycine max]
Glyma.10G021600.Wm82.a2.v1	9.71381	4.3276	4.26171e-16	-1.18332	down	--	--	Cellular Component: vacuolar membrane (GO:0005774);; Cellular Component: plasma membrane (GO:0005886);; Molecular Function: actin filament binding (GO:0051015);;	--	--	--	--	KIP1-like protein	Protein NETWORKED 3A OS=Arabidopsis thaliana OX=3702 GN=NET3A PE=2 SV=1	S	Function unknown	protein NETWORKED 4B isoform X1 [Glycine max]
Glyma.07G003400.Wm82.a2.v1	7.52906	18.1155	3.79227e-27	1.30411	up	[CHR]	Energy production and conversion;; Coenzyme transport and metabolism;; General function prediction only	Molecular Function: phosphoglycerate dehydrogenase activity (GO:0004617);; Biological Process: cellular amino acid metabolic process (GO:0006520);; Biological Process: L-serine biosynthetic process (GO:0006564);; Cellular Component: chloroplast stroma (GO:0009570);; Molecular Function: NAD binding (GO:0051287);;	K00058|0.0e+00|gmx:100793819|K00058 D-3-phosphoglycerate dehydrogenase / 2-oxoglutarate reductase [EC:1.1.1.95 1.1.1.399] | (RefSeq) D-3-phosphoglycerate dehydrogenase 2, chloroplastic	Glycine, serine and threonine metabolism (ko00260);; Cysteine and methionine metabolism (ko00270);; Carbon metabolism (ko01200);; Biosynthesis of amino acids (ko01230)	[E]	Amino acid transport and metabolism	D-isomer specific 2-hydroxyacid dehydrogenase, NAD binding domain	D-3-phosphoglycerate dehydrogenase 2, chloroplastic OS=Arabidopsis thaliana OX=3702 GN=PGDH2 PE=1 SV=2	E	Amino acid transport and metabolism	D-3-phosphoglycerate dehydrogenase 2, chloroplastic [Glycine max]
Glyma.14G017700.Wm82.a2.v1	75.1271	35.3185	3.77961e-19	-1.05372	down	--	--	Cellular Component: integral component of membrane (GO:0016021);; Biological Process: vesicle-mediated transport (GO:0016192);;	K08503|6.0e-121|gmx:100782666|K08503 syntaxin of plants SYP5 | (RefSeq) syntaxin-51	SNARE interactions in vesicular transport (ko04130)	[U]	Intracellular trafficking, secretion, and vesicular transport	SNARE domain	Syntaxin-51 OS=Arabidopsis thaliana OX=3702 GN=SYP51 PE=1 SV=1	U	Intracellular trafficking, secretion, and vesicular transport	syntaxin-51 [Glycine max]
Glyma.09G173400.Wm82.a2.v1	98.9269	47.6609	0.000153957	-1.0083	down	[V]	Defense mechanisms	Molecular Function: diphosphoinositol-polyphosphate diphosphatase activity (GO:0008486);; Molecular Function: inositol diphosphate tetrakisphosphate diphosphatase activity (GO:0052840);; Molecular Function: inositol diphosphate pentakisphosphate diphosphatase activity (GO:0052842);;	K07766|2.1e-117|gmx:100527127|K07766 diphosphoinositol-polyphosphate diphosphatase [EC:3.6.1.52] | (RefSeq) nudix hydrolase 18, mitochondrial	--	[T]	Signal transduction mechanisms	NUDIX domain	Nudix hydrolase 4 OS=Arabidopsis thaliana OX=3702 GN=NUDT4 PE=1 SV=1	T	Signal transduction mechanisms	nudix hydrolase 18, mitochondrial [Glycine max]
Glyma.06G100300.Wm82.a2.v1	8.10553	17.5326	5.60498e-06	1.15856	up	--	--	Molecular Function: electron carrier activity (GO:0009055);; Cellular Component: integral component of membrane (GO:0016021);; Cellular Component: anchored component of plasma membrane (GO:0046658);;	--	--	--	--	Plastocyanin-like domain	Blue copper protein OS=Pisum sativum OX=3888 PE=2 SV=1	S	Function unknown	uncharacterized protein LOC100306522 precursor [Glycine max]
Glyma.03G131700.Wm82.a2.v1	2.53381	6.2549	6.92531e-06	1.32045	up	--	--	--	K03860|4.9e-38|nnu:104608881|K03860 phosphatidylinositol N-acetylglucosaminyltransferase subunit Q | (RefSeq) N-acetylglucosaminyl-phosphatidylinositol biosynthetic protein gpi1-like	Glycosylphosphatidylinositol (GPI)-anchor biosynthesis (ko00563)	--	--	Gibberellin regulated protein	Protein GAST1 OS=Solanum lycopersicum OX=4081 GN=GAST1 PE=2 SV=1	S	Function unknown	gibberellin-regulated protein 3 precursor [Glycine max]
Glyma.12G222300.Wm82.a2.v1	0.721249	0.248452	0.000187986	-1.45285	down	[V]	Defense mechanisms	Molecular Function: catalytic activity (GO:0003824);; Cellular Component: plasma membrane (GO:0005886);;	--	--	[V]	Defense mechanisms	Lanthionine synthetase C-like protein	LanC-like protein GCR2 OS=Arabidopsis thaliana OX=3702 GN=GCR2 PE=1 SV=1	V	Defense mechanisms	hypothetical protein GLYMA_12G222300 [Glycine max]
Glycine_max_newGene_2945	2.52937	0.820065	9.84564e-14	-1.77193	down	--	--	--	--	--	--	--	Retroviral aspartyl protease	--	L	Replication, recombination and repair	uncharacterized protein LOC114373245 [Glycine soja]
Glyma.16G123400.Wm82.a2.v1	0.41518	1.5819	8.74569e-09	1.94056	up	--	--	--	--	--	--	--	--	--	--	--	hypothetical protein GLYMA_16G123400 [Glycine max]
Glyma.08G345100.Wm82.a2.v1	2.73308	7.88268	4.63434e-05	1.57292	up	--	--	Biological Process: positive regulation of stomatal complex development (GO:2000123);;	--	--	--	--	Stomagen	EPIDERMAL PATTERNING FACTOR-like protein 9 OS=Arabidopsis thaliana OX=3702 GN=EPFL9 PE=1 SV=1	S	Function unknown	putative stomagen [Glycine max]
Glyma.19G258300.Wm82.a2.v1	12.303	24.9864	4.25005e-12	1.07687	up	--	--	Cellular Component: integral component of membrane (GO:0016021);;	--	--	--	--	Protein of unknown function (DUF4079)	--	S	Function unknown	uncharacterized protein LOC100798854 [Glycine max]
Glyma.07G087400.Wm82.a2.v1	1.09761	2.79337	0.000169839	1.35847	up	[C]	Energy production and conversion	Molecular Function: aldehyde dehydrogenase (NAD) activity (GO:0004029);;	K12355|4.8e-293|gmx:100784449|K12355 coniferyl-aldehyde dehydrogenase [EC:1.2.1.68] | (RefSeq) aldehyde dehydrogenase family 2 member C4	Phenylpropanoid biosynthesis (ko00940)	[C]	Energy production and conversion	Aldehyde dehydrogenase family	Aldehyde dehydrogenase family 2 member C4 OS=Arabidopsis thaliana OX=3702 GN=ALDH2C4 PE=1 SV=2	C	Energy production and conversion	aldehyde dehydrogenase family 2 member C4 [Glycine max]
Glyma.08G066900.Wm82.a2.v1	0.774133	1.59092	0.00260611	1.06237	up	[F]	Nucleotide transport and metabolism	Cellular Component: cytoplasm (GO:0005737);; Cellular Component: cytosol (GO:0005829);; Biological Process: glutamine metabolic process (GO:0006541);;	K22314|1.2e-143|gmx:100813163|K22314 glucosinolate gamma-glutamyl hydrolase [EC:3.4.19.16] | (RefSeq) gamma-glutamyl peptidase 5	--	[F]	Nucleotide transport and metabolism	Glutamine amidotransferase class-I	Gamma-glutamyl peptidase 5 OS=Arabidopsis thaliana OX=3702 GN=GGP5 PE=2 SV=1	F	Nucleotide transport and metabolism	gamma-glutamyl peptidase 5 [Glycine max]
Glyma.08G249500.Wm82.a2.v1	2.36654	1.03618	7.79637e-06	-1.14954	down	--	--	Molecular Function: transferase activity, transferring acyl groups other than amino-acyl groups (GO:0016747);;	K13264|2.7e-72|lja:Lj2g3v1090790.1|K13264 isoflavone 7-O-glucoside-6''-O-malonyltransferase [EC:2.3.1.115] | (RefSeq) Lj2g3v1090790.1; -	Isoflavonoid biosynthesis (ko00943);; Flavone and flavonol biosynthesis (ko00944)	--	--	Transferase family	Coumaroyl-CoA:anthocyanidin 3-O-glucoside-6''-O-coumaroyltransferase 1 OS=Arabidopsis thaliana OX=3702 GN=3AT1 PE=1 SV=1	H	Coenzyme transport and metabolism	coumaroyl-CoA:anthocyanidin 3-O-glucoside-6''-O-coumaroyltransferase 1 [Glycine max]
Glyma.12G021300.Wm82.a2.v1	218.773	449.332	3.04013e-07	1.07126	up	--	--	Molecular Function: glucan exo-1,3-beta-glucosidase activity (GO:0004338);; Biological Process: carbohydrate metabolic process (GO:0005975);; Molecular Function: glucan endo-1,3-beta-D-glucosidase activity (GO:0042973);;	K19891|4.8e-60|csat:104710092|K19891 glucan endo-1,3-beta-glucosidase 1/2/3 [EC:3.2.1.39] | (RefSeq) glucan endo-1,3-beta-glucosidase 3 isoform X2	Starch and sucrose metabolism (ko00500)	--	--	Glycosyl hydrolases family 17	Glucan endo-1,3-beta-glucosidase (Fragment) OS=Glycine max OX=3847 PE=2 SV=1	G	Carbohydrate transport and metabolism	glucan endo-1,3-beta-glucosidase precursor [Glycine max]
Glyma.08G076400.Wm82.a2.v1	1.07151	2.89728	1.24327e-08	1.43307	up	[E]	Amino acid transport and metabolism	Molecular Function: carboxy-lyase activity (GO:0016831);; Biological Process: carboxylic acid metabolic process (GO:0019752);; Molecular Function: pyridoxal phosphate binding (GO:0030170);;	K01590|3.8e-295|gmx:100792053|K01590 histidine decarboxylase [EC:4.1.1.22] | (RefSeq) aspartate aminotransferase superfamily protein	Histidine metabolism (ko00340)	[E]	Amino acid transport and metabolism	Pyridoxal-dependent decarboxylase conserved domain	Serine decarboxylase 1 OS=Oryza sativa subsp. japonica OX=39947 GN=SDC1 PE=3 SV=1	E	Amino acid transport and metabolism	aspartate aminotransferase superfamily protein [Glycine max]
Glyma.06G254900.Wm82.a2.v1	0.947911	2.03247	2.98119e-07	1.13748	up	--	--	Molecular Function: NAD+ kinase activity (GO:0003951);; Molecular Function: diacylglycerol kinase activity (GO:0004143);; Molecular Function: ATP binding (GO:0005524);; Biological Process: protein kinase C-activating G-protein coupled receptor signaling pathway (GO:0007205);;	K00901|8.2e-290|gmx:100816144|K00901 diacylglycerol kinase (ATP) [EC:2.7.1.107] | (RefSeq) diacylglycerol kinase 5 isoform X2	Glycerolipid metabolism (ko00561);; Glycerophospholipid metabolism (ko00564);; Phosphatidylinositol signaling system (ko04070)	[IT]	Lipid transport and metabolism;; Signal transduction mechanisms	Diacylglycerol kinase accessory domain	Diacylglycerol kinase 5 OS=Arabidopsis thaliana OX=3702 GN=DGK5 PE=2 SV=1	--	--	diacylglycerol kinase 5 isoform X1 [Glycine max]
Glyma.08G109200.Wm82.a2.v1	2.10094	4.55161	1.29557e-06	1.14873	up	[Q]	Secondary metabolites biosynthesis, transport and catabolism	Biological Process: biosynthetic process (GO:0009058);; Molecular Function: transferase activity, transferring acyl groups other than amino-acyl groups (GO:0016747);;	K00660|2.8e-224|gmx:106799718|K00660 chalcone synthase [EC:2.3.1.74] | (RefSeq) CHS5; chalcone synthase 5	Flavonoid biosynthesis (ko00941);; Circadian rhythm - plant (ko04712)	--	--	Chalcone and stilbene synthases, N-terminal domain	Chalcone synthase 5 OS=Glycine max OX=3847 GN=CHS5 PE=3 SV=1	H	Coenzyme transport and metabolism	chalcone synthase 5 [Glycine max]
Glyma.09G031600.Wm82.a2.v1	0.290272	1.60757	1.03474e-08	2.47732	up	[G]	Carbohydrate transport and metabolism	Molecular Function: polygalacturonase activity (GO:0004650);; Cellular Component: extracellular region (GO:0005576);; Biological Process: carbohydrate metabolic process (GO:0005975);; Molecular Function: galacturan 1,4-alpha-galacturonidase activity (GO:0047911);; Biological Process: cell wall organization (GO:0071555);;	K01213|1.5e-150|aip:107645968|K01213 galacturan 1,4-alpha-galacturonidase [EC:3.2.1.67] | (RefSeq) polygalacturonase At1g48100-like	Pentose and glucuronate interconversions (ko00040)	--	--	Glycosyl hydrolases family 28	Polygalacturonase At1g48100 OS=Arabidopsis thaliana OX=3702 GN=At1g48100 PE=2 SV=1	G	Carbohydrate transport and metabolism	polygalacturonase At1g48100 [Glycine max]
Glyma.09G258400.Wm82.a2.v1	1.18996	2.97188	0.000314097	1.35672	up	[C]	Energy production and conversion	Molecular Function: SNARE binding (GO:0000149);; Cellular Component: lytic vacuole (GO:0000323);; Cellular Component: endosome (GO:0005768);; Biological Process: SNARE complex assembly (GO:0035493);;	K21249|1.5e-10|cre:CHLREDRAFT_168675|K21249 UV radiation resistance-associated gene protein | (RefSeq) MOT27; predicted protein	--	--	--	--	--	--	--	hypothetical protein GLYMA_09G258400 [Glycine max]
Glycine_max_newGene_4673	1.08354	0.505801	0.00986133	-1.06727	down	--	--	Molecular Function: transcription corepressor activity (GO:0003714);; Cellular Component: nucleus (GO:0005634);; Biological Process: regulation of transcription, DNA-templated (GO:0006355);;	K11644|1.8e-44|gmx:100782878|K11644 paired amphipathic helix protein Sin3a | (RefSeq) paired amphipathic helix protein Sin3-like 3	--	[B]	Chromatin structure and dynamics	--	Paired amphipathic helix protein Sin3-like 3 OS=Arabidopsis thaliana OX=3702 GN=SNL3 PE=1 SV=3	B	Chromatin structure and dynamics	paired amphipathic helix protein Sin3-like 3 [Glycine soja]
Glyma.09G188600.Wm82.a2.v1	4.27958	10.2175	7.1137e-14	1.28828	up	--	--	--	K00924|1.4e-06|bdi:100844548|K00924 kinase [EC:2.7.1.-] | (RefSeq) receptor-like protein kinase 5	--	--	--	Leucine rich repeat	Leucine-rich repeat extensin-like protein 4 OS=Arabidopsis thaliana OX=3702 GN=LRX4 PE=1 SV=1	S	Function unknown	hypothetical protein GLYMA_09G188600 [Glycine max]
Glyma.18G259400.Wm82.a2.v1	7.02883	1.38679	1.07678e-21	-2.28716	down	--	--	Biological Process: response to acid chemical (GO:0001101);; Cellular Component: cellular_component (GO:0005575);; Cellular Component: extracellular region (GO:0005576);; Biological Process: cell communication (GO:0007154);; Biological Process: signal transduction (GO:0007165);; Biological Process: biological_process (GO:0008150);; Biological Process: response to endogenous stimulus (GO:0009719);…	K03860|1.3e-25|nnu:104608881|K03860 phosphatidylinositol N-acetylglucosaminyltransferase subunit Q | (RefSeq) N-acetylglucosaminyl-phosphatidylinositol biosynthetic protein gpi1-like	Glycosylphosphatidylinositol (GPI)-anchor biosynthesis (ko00563)	--	--	Gibberellin regulated protein	Gibberellin-regulated protein 4 OS=Arabidopsis thaliana OX=3702 GN=GASA4 PE=1 SV=2	S	Function unknown	gibberellin-regulated protein 32 precursor [Glycine max]
Glyma.04G222100.Wm82.a2.v1	29.2362	89.7452	1.81114e-19	1.65174	up	--	--	Cellular Component: extracellular region (GO:0005576);; Cellular Component: cell wall (GO:0005618);; Biological Process: plant-type cell wall organization (GO:0009664);; Cellular Component: membrane (GO:0016020);;	K20628|1.1e-147|gmx:100807183|K20628 expansin | (RefSeq) expansin-A8	--	--	--	Expansin C-terminal domain	Expansin-A8 OS=Arabidopsis thaliana OX=3702 GN=EXPA8 PE=2 SV=1	S	Function unknown	expansin-A8 [Glycine max]
Glyma.20G070100.Wm82.a2.v1	26.5193	10.0328	7.04167e-12	-1.3655	down	--	--	Molecular Function: DNA binding (GO:0003677);; Molecular Function: transcription factor activity, sequence-specific DNA binding (GO:0003700);; Cellular Component: nucleus (GO:0005634);;	K00850|6.3e-45|lja:Lj5g3v1697360.1|K00850 6-phosphofructokinase 1 [EC:2.7.1.11] | (RefSeq) Lj5g3v1697360.1; -	Glycolysis / Gluconeogenesis (ko00010);; Pentose phosphate pathway (ko00030);; Fructose and mannose metabolism (ko00051);; Galactose metabolism (ko00052);; Carbon metabolism (ko01200);; Biosynthesis of amino acids (ko01230);; RNA degradation (ko03018)	--	--	AP2 domain	Ethylene-responsive transcription factor ERF107 OS=Arabidopsis thaliana OX=3702 GN=ERF107 PE=2 SV=1	K	Transcription	DNA-binding domain-containing protein [Glycine max]
Glyma.13G194000.Wm82.a2.v1	0.809509	1.75814	0.000205329	1.13948	up	[J]	Translation, ribosomal structure and biogenesis	Cellular Component: mitochondrion (GO:0005739);; Biological Process: translation (GO:0006412);; Molecular Function: ribosomal large subunit binding (GO:0043023);;	K02838|1.4e-139|gmx:100814905|K02838 ribosome recycling factor | (RefSeq) uncharacterized protein LOC100814905	--	[J]	Translation, ribosomal structure and biogenesis	Ribosome recycling factor	--	J	Translation, ribosomal structure and biogenesis	putative ribosome-recycling factor [Glycine max]
Glyma.15G207200.Wm82.a2.v1	11.3093	4.96222	1.81593e-16	-1.15073	down	[I]	Lipid transport and metabolism	Molecular Function: catalytic activity (GO:0003824);;	K01895|4.1e-38|qsu:112039954|K01895 acetyl-CoA synthetase [EC:6.2.1.1] | (RefSeq) acetyl-coenzyme A synthetase-like	Glycolysis / Gluconeogenesis (ko00010);; Pyruvate metabolism (ko00620);; Glyoxylate and dicarboxylate metabolism (ko00630);; Propanoate metabolism (ko00640);; Carbon metabolism (ko01200)	[I]	Lipid transport and metabolism	AMP-binding enzyme	Probable acyl-activating enzyme 17, peroxisomal OS=Arabidopsis thaliana OX=3702 GN=AAE17 PE=2 SV=1	I	Lipid transport and metabolism	probable acyl-activating enzyme 17, peroxisomal [Glycine max]
Glyma.06G040700.Wm82.a2.v1	1.56606	3.42405	2.45093e-09	1.16921	up	--	--	--	--	--	--	--	Remorin, C-terminal region	--	S	Function unknown	hypothetical protein GLYMA_06G040700 [Glycine max]
Glyma.09G051100.Wm82.a2.v1	8.80567	23.5083	1.59377e-23	1.45344	up	[N]	Cell motility	Cellular Component: Golgi apparatus (GO:0005794);; Cellular Component: trans-Golgi network (GO:0005802);; Cellular Component: plasma membrane (GO:0005886);; Biological Process: plant-type primary cell wall biogenesis (GO:0009833);; Cellular Component: integral component of membrane (GO:0016021);; Molecular Function: cellulose synthase activity (GO:0016759);; Molecular Function: cellulose synthase…	K10999|0.0e+00|gmx:100781996|K10999 cellulose synthase A [EC:2.4.1.12] | (RefSeq) cellulose synthase A catalytic subunit 4 [UDP-forming]	--	--	--	Cellulose synthase	Cellulose synthase A catalytic subunit 4 [UDP-forming] OS=Arabidopsis thaliana OX=3702 GN=CESA4 PE=1 SV=1	G	Carbohydrate transport and metabolism	cellulose synthase A catalytic subunit 4 [UDP-forming] [Glycine max]
Glyma.06G202300.Wm82.a2.v1	1.45232	2.94218	7.87344e-05	1.05007	up	[QV]	Secondary metabolites biosynthesis, transport and catabolism;; Defense mechanisms	Molecular Function: iron ion binding (GO:0005506);; Cellular Component: membrane (GO:0016020);; Molecular Function: oxidoreductase activity, acting on paired donors, with incorporation or reduction of molecular oxygen, NAD(P)H as one donor, and incorporation of one atom of oxygen (GO:0016709);; Molecular Function: heme binding (GO:0020037);;	K05280|2.7e-299|gmx:547475|K05280 flavonoid 3'-monooxygenase [EC:1.14.14.82] | (RefSeq) SF3'H1; flavonoid 3'-hydroxylase	Flavonoid biosynthesis (ko00941);; Flavone and flavonol biosynthesis (ko00944)	[Q]	Secondary metabolites biosynthesis, transport and catabolism	Cytochrome P450	Flavonoid 3'-monooxygenase OS=Petunia hybrida OX=4102 GN=CYP75B2 PE=2 SV=1	Q	Secondary metabolites biosynthesis, transport and catabolism	flavonoid 3'-hydroxylase [Glycine max]
Glyma.13G172500.Wm82.a2.v1	0.836547	4.49785	4.80547e-14	2.43758	up	[IR]	Lipid transport and metabolism;; General function prediction only	Molecular Function: hydrolase activity, acting on ester bonds (GO:0016788);;	K00679|2.4e-63|cic:CICLE_v10027727mg|K00679 phospholipid:diacylglycerol acyltransferase [EC:2.3.1.158] | (RefSeq) hypothetical protein	Glycerolipid metabolism (ko00561)	--	--	GDSL-like Lipase/Acylhydrolase	GDSL esterase/lipase At5g45960 OS=Arabidopsis thaliana OX=3702 GN=At5g45960 PE=2 SV=1	I	Lipid transport and metabolism	GDSL esterase/lipase At5g45960 [Glycine max]
Glyma.15G072400.Wm82.a2.v1	86.4686	30.6309	0.000586224	-1.46456	down	--	--	--	--	--	--	--	Aluminium induced protein	Stem-specific protein TSJT1 OS=Nicotiana tabacum OX=4097 GN=TSJT1 PE=2 SV=1	S	Function unknown	uncharacterized protein LOC100780697 [Glycine max]
Glyma.10G139700.Wm82.a2.v1	3.01165	8.69321	1.67553e-12	1.55759	up	[G]	Carbohydrate transport and metabolism	Cellular Component: cell wall (GO:0005618);; Molecular Function: manganese ion binding (GO:0030145);; Molecular Function: nutrient reservoir activity (GO:0045735);; Cellular Component: apoplast (GO:0048046);;	--	--	--	--	Cupin	Germin-like protein subfamily 2 member 4 OS=Arabidopsis thaliana OX=3702 GN=GLP10 PE=2 SV=1	S	Function unknown	germin-like protein precursor [Glycine max]
Glyma.13G116900.Wm82.a2.v1	4.08458	1.08823	3.39168e-13	-1.84931	down	--	--	Molecular Function: peptide:proton symporter activity (GO:0015333);; Cellular Component: integral component of membrane (GO:0016021);; Molecular Function: oligopeptide transmembrane transporter activity (GO:0035673);; Molecular Function: peptide transmembrane transporter activity (GO:1904680);;	K14638|0.0e+00|gmx:100817025|K14638 solute carrier family 15 (peptide/histidine transporter), member 3/4 | (RefSeq) protein NRT1/ PTR FAMILY 4.5	--	[E]	Amino acid transport and metabolism	POT family	Protein NRT1/ PTR FAMILY 4.5 OS=Arabidopsis thaliana OX=3702 GN=NPF4.5 PE=2 SV=1	E	Amino acid transport and metabolism	protein NRT1/ PTR FAMILY 4.5 [Glycine max]
Glyma.19G190600.Wm82.a2.v1	1.01017	2.56974	1.72661e-10	1.3206	up	[N]	Cell motility	Cellular Component: Golgi apparatus (GO:0005794);; Cellular Component: integral component of membrane (GO:0016021);; Molecular Function: transferase activity, transferring glycosyl groups (GO:0016757);; Molecular Function: mannan synthase activity (GO:0051753);;	K13680|4.6e-310|gmx:100782772|K13680 beta-mannan synthase [EC:2.4.1.32] | (RefSeq) glucomannan 4-beta-mannosyltransferase 9	--	--	--	Glycosyltransferase like family 2	Glucomannan 4-beta-mannosyltransferase 9 OS=Arabidopsis thaliana OX=3702 GN=CSLA9 PE=1 SV=1	M	Cell wall/membrane/envelope biogenesis	glucomannan 4-beta-mannosyltransferase 9 [Glycine max]
Glyma.02G228300.Wm82.a2.v1	1.58421	0.405284	0.000111331	-1.90162	down	[T]	Signal transduction mechanisms	Molecular Function: protein serine/threonine kinase activity (GO:0004674);; Molecular Function: ATP binding (GO:0005524);; Cellular Component: cytoplasm (GO:0005737);; Biological Process: regulation of mitotic cell cycle (GO:0007346);; Cellular Component: integral component of membrane (GO:0016021);; Biological Process: signal transduction by protein phosphorylation (GO:0023014);; Biological Proc…	K20716|2.7e-56|mesc:110629620|K20716 mitogen-activated protein kinase kinase kinase 17/18 | (RefSeq) mitogen-activated protein kinase kinase kinase 18-like	MAPK signaling pathway - plant (ko04016)	[T]	Signal transduction mechanisms	Protein kinase domain	Mitogen-activated protein kinase kinase kinase 17 OS=Arabidopsis thaliana OX=3702 GN=MAPKKK17 PE=1 SV=1	T	Signal transduction mechanisms	mitogen-activated protein kinase kinase kinase 18 [Glycine max]
Glyma.17G116500.Wm82.a2.v1	3.72444	1.76479	0.000174337	-1.03146	down	[M]	Cell wall/membrane/envelope biogenesis	Biological Process: nitrogen compound metabolic process (GO:0006807);; Molecular Function: racemase activity, acting on amino acids and derivatives (GO:0036361);;	--	--	--	--	Asp/Glu/Hydantoin racemase	--	M	Cell wall/membrane/envelope biogenesis	uncharacterized protein LOC100792806 [Glycine max]
Glyma.02G053500.Wm82.a2.v1	0.560308	1.09407	0.00220034	1.01182	up	[MDT]	Cell wall/membrane/envelope biogenesis;; Cell cycle control, cell division, chromosome partitioning;; Signal transduction mechanisms	Molecular Function: ATP binding (GO:0005524);;	K08900|3.9e-122|fve:101307344|K08900 mitochondrial chaperone BCS1 | (RefSeq) putative cell division cycle ATPase	--	[O]	Posttranslational modification, protein turnover, chaperones	Domain associated at C-terminal with AAA	AAA-ATPase At5g17760 OS=Arabidopsis thaliana OX=3702 GN=At5g17760 PE=3 SV=1	O	Posttranslational modification, protein turnover, chaperones	hypothetical protein GLYMA_02G053500 [Glycine max]
Glyma.10G016500.Wm82.a2.v1	0.86104	1.71715	0.00035335	1.02042	up	--	--	Molecular Function: DNA binding (GO:0003677);; Molecular Function: transcription factor activity, sequence-specific DNA binding (GO:0003700);; Cellular Component: nucleus (GO:0005634);;	K09286|8.5e-176|gmx:100780763|K09286 EREBP-like factor | (RefSeq) uncharacterized protein LOC100780763	--	--	--	AP2 domain	Ethylene-responsive transcription factor RAP2-3 OS=Arabidopsis thaliana OX=3702 GN=RAP2-3 PE=1 SV=2	K	Transcription	uncharacterized protein LOC100780763 [Glycine max]
Glyma.02G157900.Wm82.a2.v1	2.94977	1.33268	0.00101909	-1.08418	down	--	--	--	--	--	--	--	--	--	--	--	hypothetical protein GLYMA_02G157900 [Glycine max]
Glyma.09G166300.Wm82.a2.v1	1.2117	0.27451	1.91926e-09	-2.03998	down	--	--	Molecular Function: actin binding (GO:0003779);; Molecular Function: kinase activity (GO:0016301);;	--	--	--	--	KIP1-like protein	Kinase-interacting family protein OS=Arabidopsis thaliana OX=3702 GN=At1g48405 PE=2 SV=1	S	Function unknown	kinase-interacting family protein-like isoform X1 [Glycine max]
Glyma.08G320400.Wm82.a2.v1	70.3519	28.6055	9.7574e-21	-1.25519	down	--	--	--	--	--	--	--	--	--	--	--	uncharacterized protein LOC100795224 [Glycine max]
Glyma.11G049600.Wm82.a2.v1	0.720539	1.64885	0.000425907	1.20183	up	--	--	Molecular Function: peroxidase activity (GO:0004601);; Cellular Component: extracellular region (GO:0005576);; Biological Process: response to oxidative stress (GO:0006979);; Molecular Function: heme binding (GO:0020037);; Biological Process: hydrogen peroxide catabolic process (GO:0042744);; Molecular Function: metal ion binding (GO:0046872);;	K00430|6.8e-187|gmx:100804350|K00430 peroxidase [EC:1.11.1.7] | (RefSeq) uncharacterized protein LOC100804350 precursor	Phenylpropanoid biosynthesis (ko00940)	--	--	Peroxidase	Peroxidase 50 OS=Arabidopsis thaliana OX=3702 GN=PER50 PE=1 SV=1	Q	Secondary metabolites biosynthesis, transport and catabolism	uncharacterized protein LOC100804350 precursor [Glycine max]
Glyma.09G273500.Wm82.a2.v1	1.16966	3.89269	1.0998e-06	1.74439	up	[G]	Carbohydrate transport and metabolism	Biological Process: carbohydrate metabolic process (GO:0005975);; Molecular Function: mannan endo-1,4-beta-mannosidase activity (GO:0016985);;	K19355|2.6e-291|gmx:100805357|K19355 mannan endo-1,4-beta-mannosidase [EC:3.2.1.78] | (RefSeq) mannan endo-1,4-beta-mannosidase 6	Fructose and mannose metabolism (ko00051)	--	--	Cellulase (glycosyl hydrolase family 5)	Mannan endo-1,4-beta-mannosidase 6 OS=Arabidopsis thaliana OX=3702 GN=MAN6 PE=2 SV=1	G	Carbohydrate transport and metabolism	mannan endo-1,4-beta-mannosidase 6 [Glycine max]
Glyma.20G236200.Wm82.a2.v1	0.678725	0.193105	3.52504e-07	-1.7442	down	[T]	Signal transduction mechanisms	Molecular Function: peroxidase activity (GO:0004601);; Molecular Function: calcium ion binding (GO:0005509);; Cellular Component: plasma membrane (GO:0005886);; Cellular Component: integral component of membrane (GO:0016021);; Molecular Function: NAD(P)H oxidase activity (GO:0016174);; Biological Process: oxidation-reduction process (GO:0055114);;	K13447|0.0e+00|gmx:100787949|K13447 respiratory burst oxidase [EC:1.6.3.- 1.11.1.-] | (RefSeq) respiratory burst oxidase homolog protein B	MAPK signaling pathway - plant (ko04016);; Plant-pathogen interaction (ko04626)	[PQ]	Inorganic ion transport and metabolism;; Secondary metabolites biosynthesis, transport and catabolism	Ferric reductase NAD binding domain	Respiratory burst oxidase homolog protein B OS=Solanum tuberosum OX=4113 GN=RBOHB PE=1 SV=1	--	--	respiratory burst oxidase homolog protein B [Glycine max]
Glyma.19G098100.Wm82.a2.v1	0.58077	1.1519	0.0112425	1.00638	up	[K]	Transcription	Molecular Function: voltage-gated chloride channel activity (GO:0005247);; Cellular Component: Golgi apparatus (GO:0005794);; Cellular Component: chloroplast (GO:0009507);; Cellular Component: integral component of membrane (GO:0016021);;	--	--	[P]	Inorganic ion transport and metabolism	Voltage gated chloride channel	Chloride channel protein CLC-f OS=Arabidopsis thaliana OX=3702 GN=CLC-F PE=2 SV=2	P	Inorganic ion transport and metabolism	hypothetical protein GLYMA_19G098100 [Glycine max]
Glyma.09G157900.Wm82.a2.v1	3.64519	1.27035	2.7713e-17	-1.47706	down	[T]	Signal transduction mechanisms	Molecular Function: voltage-gated chloride channel activity (GO:0005247);; Cellular Component: integral component of membrane (GO:0016021);;	K05016|0.0e+00|gmx:100777170|K05016 chloride channel 7 | (RefSeq) chloride channel protein CLC-c isoform X1	--	[P]	Inorganic ion transport and metabolism	Voltage gated chloride channel	Chloride channel protein CLC-c OS=Arabidopsis thaliana OX=3702 GN=CLC-C PE=1 SV=1	P	Inorganic ion transport and metabolism	chloride channel protein CLC-c isoform X1 [Glycine max]
Glyma.03G173300.Wm82.a2.v1	11.9925	2.26312	0.000119086	-2.33845	down	--	--	Biological Process: response to chitin (GO:0010200);;	--	--	[R]	General function prediction only	C2H2-type zinc finger	Zinc finger protein ZAT11 OS=Arabidopsis thaliana OX=3702 GN=ZAT11 PE=2 SV=1	S	Function unknown	C2H2-type zinc finger protein [Glycine max]
Glyma.02G226500.Wm82.a2.v1	1.09407	2.82986	6.62373e-06	1.40174	up	[P]	Inorganic ion transport and metabolism	Biological Process: cellular calcium ion homeostasis (GO:0006874);; Cellular Component: plant-type vacuole membrane (GO:0009705);; Molecular Function: calcium:proton antiporter activity (GO:0015369);; Cellular Component: integral component of membrane (GO:0016021);; Biological Process: calcium ion transmembrane transport (GO:0070588);;	K07300|8.0e-247|gmx:100802344|K07300 Ca2+:H+ antiporter | (RefSeq) vacuolar cation/proton exchanger 3	--	[P]	Inorganic ion transport and metabolism	Sodium/calcium exchanger protein	Vacuolar cation/proton exchanger 3 OS=Arabidopsis thaliana OX=3702 GN=CAX3 PE=1 SV=1	P	Inorganic ion transport and metabolism	vacuolar cation/proton exchanger 3 [Glycine max]
Glyma.11G231300.Wm82.a2.v1	0.798722	1.80102	0.000114255	1.2245	up	--	--	Molecular Function: protein dimerization activity (GO:0046983);;	K22484|5.5e-28|pvu:PHAVU_001G121200g|K22484 transcriptional regulator CBF1 | (RefSeq) hypothetical protein	--	--	--	Helix-loop-helix DNA-binding domain	Transcription factor bHLH51 OS=Arabidopsis thaliana OX=3702 GN=BHLH51 PE=2 SV=1	K	Transcription	transcription factor bHLH51-like [Glycine soja]
Glyma.04G014800.Wm82.a2.v1	2.70388	9.67929	1.09946e-06	1.85451	up	[O]	Posttranslational modification, protein turnover, chaperones	Molecular Function: cysteine-type peptidase activity (GO:0008234);;	K16290|1.3e-204|gmx:100788466|K16290 xylem cysteine proteinase [EC:3.4.22.-] | (RefSeq) uncharacterized protein LOC100788466	--	[O]	Posttranslational modification, protein turnover, chaperones	Papain family cysteine protease	Cysteine protease XCP2 OS=Arabidopsis thaliana OX=3702 GN=XCP2 PE=1 SV=2	O	Posttranslational modification, protein turnover, chaperones	uncharacterized protein LOC100788466 [Glycine max]
Glyma.02G172300.Wm82.a2.v1	4.81207	2.23173	6.11284e-05	-1.05499	down	--	--	Biological Process: maturation of LSU-rRNA from tricistronic rRNA transcript (SSU-rRNA, 5.8S rRNA, LSU-rRNA) (GO:0000463);; Biological Process: maturation of 5.8S rRNA from tricistronic rRNA transcript (SSU-rRNA, 5.8S rRNA, LSU-rRNA) (GO:0000466);; Cellular Component: nucleolus (GO:0005730);;	K14861|3.3e-59|gmx:100796806|K14861 nucleolar pre-ribosomal-associated protein 1 | (RefSeq) uncharacterized protein LOC100796806 isoform X1	--	[S]	Function unknown	Nucleolar pre-ribosomal-associated protein 1	--	S	Function unknown	Nucleolar pre-ribosomal-associated protein 1, partial [Glycine soja]
Glyma.06G319300.Wm82.a2.v1	7.24901	16.1606	1.26094e-16	1.18618	up	--	--	Molecular Function: enzyme inhibitor activity (GO:0004857);; Biological Process: negative regulation of catalytic activity (GO:0043086);;	K01051|5.3e-17|eus:EUTSA_v10020354mg|K01051 pectinesterase [EC:3.1.1.11] | (RefSeq) hypothetical protein	Pentose and glucuronate interconversions (ko00040)	--	--	Plant invertase/pectin methylesterase inhibitor	21 kDa protein OS=Daucus carota OX=4039 PE=2 SV=1	S	Function unknown	uncharacterized protein LOC100527116 precursor [Glycine max]
Glyma.11G137300.Wm82.a2.v1	43.5551	12.5738	2.29952e-06	-1.74138	down	--	--	Cellular Component: cytoplasm (GO:0005737);; Biological Process: protein ubiquitination (GO:0016567);; Molecular Function: ubiquitin protein ligase activity (GO:0061630);;	K11982|8.7e-111|gmx:100784822|K11982 E3 ubiquitin-protein ligase RNF115/126 [EC:2.3.2.27] | (RefSeq) E3 ubiquitin-protein ligase RDUF2	--	[O]	Posttranslational modification, protein turnover, chaperones	Protein of unknown function (DUF1117)	E3 ubiquitin-protein ligase RDUF2 OS=Arabidopsis thaliana OX=3702 GN=DURF2 PE=1 SV=1	O	Posttranslational modification, protein turnover, chaperones	E3 ubiquitin-protein ligase RDUF2 [Glycine max]
Glyma.01G045900.Wm82.a2.v1	1.28361	0.453411	1.54719e-05	-1.46416	down	--	--	--	K07052|1.9e-09|ini:109194101|K07052 uncharacterized protein | (RefSeq) uncharacterized LOC109194101	--	--	--	--	Probable membrane-associated kinase regulator 6 OS=Arabidopsis thaliana OX=3702 GN=MAKR6 PE=2 SV=1	S	Function unknown	probable membrane-associated kinase regulator 6 [Glycine max]
Glyma.11G062500.Wm82.a2.v1	1.48396	6.1934	5.22759e-15	2.08362	up	[QV]	Secondary metabolites biosynthesis, transport and catabolism;; Defense mechanisms	Molecular Function: iron ion binding (GO:0005506);; Cellular Component: membrane (GO:0016020);; Cellular Component: integral component of membrane (GO:0016021);; Molecular Function: oxidoreductase activity, acting on paired donors, with incorporation or reduction of molecular oxygen, NAD(P)H as one donor, and incorporation of one atom of oxygen (GO:0016709);; Molecular Function: heme binding (GO:…	K15472|6.0e-158|sot:102603857|K15472 premnaspirodiene oxygenase [EC:1.14.14.151] | (RefSeq) CYP71D4; premnaspirodiene oxygenase	Sesquiterpenoid and triterpenoid biosynthesis (ko00909)	[Q]	Secondary metabolites biosynthesis, transport and catabolism	Cytochrome P450	Cytochrome P450 71D8 OS=Glycine max OX=3847 GN=CYP71D8 PE=2 SV=1	Q	Secondary metabolites biosynthesis, transport and catabolism	cytochrome P450 71D8-like [Glycine max]
Glyma.13G279600.Wm82.a2.v1	3.53862	9.42022	2.70035e-25	1.45257	up	--	--	Biological Process: response to light stimulus (GO:0009416);; Biological Process: positive regulation of transcription, DNA-templated (GO:0045893);;	--	--	--	--	--	COP1-interacting protein 7 OS=Arabidopsis thaliana OX=3702 GN=CIP7 PE=1 SV=1	S	Function unknown	COP1-interacting protein 7 [Glycine max]
Glyma.20G158700.Wm82.a2.v1	0.643212	1.6309	5.44677e-05	1.34765	up	[G]	Carbohydrate transport and metabolism	Molecular Function: carbohydrate binding (GO:0030246);;	--	--	--	--	Legume lectin domain	Lectin OS=Leucomphalos mildbraedii OX=28956 PE=1 SV=1	T	Signal transduction mechanisms	putative lectin [Glycine max]
Glyma.17G259700.Wm82.a2.v1	0.318024	1.76454	3.19833e-08	2.45387	up	[IR]	Lipid transport and metabolism;; General function prediction only	Cellular Component: extracellular region (GO:0005576);; Biological Process: lipid metabolic process (GO:0006629);; Molecular Function: lipase activity (GO:0016298);;	K00679|1.1e-66|cic:CICLE_v10027727mg|K00679 phospholipid:diacylglycerol acyltransferase [EC:2.3.1.158] | (RefSeq) hypothetical protein	Glycerolipid metabolism (ko00561)	--	--	GDSL-like Lipase/Acylhydrolase	GDSL esterase/lipase EXL3 OS=Arabidopsis thaliana OX=3702 GN=EXL3 PE=2 SV=1	I	Lipid transport and metabolism	GDSL esterase/lipase EXL3 [Glycine max]
Glyma.18G223900.Wm82.a2.v1	3.49016	9.65245	4.09105e-11	1.49769	up	--	--	Molecular Function: electron carrier activity (GO:0009055);; Cellular Component: anchored component of plasma membrane (GO:0046658);;	--	--	--	--	Plastocyanin-like domain	--	S	Function unknown	cucumber peeling cupredoxin [Glycine max]
Glycine_max_newGene_4302	0.314917	1.36267	2.29126e-06	2.09111	up	--	--	--	--	--	--	--	Plant mobile domain	Protein MAIN-LIKE 1 OS=Arabidopsis thaliana OX=3702 GN=MAIL1 PE=1 SV=1	S	Function unknown	protein MAIN-LIKE 1-like [Glycine max]
Glyma.10G251000.Wm82.a2.v1	2.74182	6.76211	1.09575e-07	1.33608	up	--	--	Cellular Component: cellular_component (GO:0005575);; Cellular Component: cell (GO:0005623);; Cellular Component: plasma membrane (GO:0005886);; Cellular Component: membrane (GO:0016020);; Cellular Component: intrinsic component of membrane (GO:0031224);; Cellular Component: anchored component of membrane (GO:0031225);; Cellular Component: intrinsic component of plasma membrane (GO:0031226);; Cel…	--	--	--	--	--	Uncharacterized GPI-anchored protein At5g19250 OS=Arabidopsis thaliana OX=3702 GN=At5g19250 PE=2 SV=1	S	Function unknown	uncharacterized protein LOC100306063 precursor [Glycine max]
Glyma.07G055800.Wm82.a2.v1	0.418048	0.830525	0.00215419	1.01167	up	--	--	Cellular Component: integral component of membrane (GO:0016021);; Biological Process: oxidation-reduction process (GO:0055114);;	--	--	[T]	Signal transduction mechanisms	DOMON domain	Cytochrome b561 and DOMON domain-containing protein At3g61750 OS=Arabidopsis thaliana OX=3702 GN=At3g61750 PE=3 SV=1	T	Signal transduction mechanisms	cytochrome b561 and DOMON domain-containing protein At3g61750 isoform X2 [Glycine max]
Glyma.08G283600.Wm82.a2.v1	0.963685	1.9232	0.00028504	1.01137	up	--	--	--	--	--	--	--	Neprosin	--	S	Function unknown	uncharacterized protein LOC100792240 [Glycine max]
Glyma.07G172000.Wm82.a2.v1	18.4525	8.92768	9.36664e-15	-1.01226	down	[G]	Carbohydrate transport and metabolism	Molecular Function: alpha,alpha-trehalose-phosphate synthase (UDP-forming) activity (GO:0003825);; Molecular Function: trehalose-phosphatase activity (GO:0004805);; Biological Process: trehalose biosynthetic process (GO:0005992);;	K16055|0.0e+00|gmx:100818822|K16055 trehalose 6-phosphate synthase/phosphatase [EC:2.4.1.15 3.1.3.12] | (RefSeq) alpha,alpha-trehalose-phosphate synthase [UDP-forming] 6	Starch and sucrose metabolism (ko00500)	[G]	Carbohydrate transport and metabolism	Glycosyltransferase family 20	Alpha,alpha-trehalose-phosphate synthase [UDP-forming] 6 OS=Arabidopsis thaliana OX=3702 GN=TPS6 PE=1 SV=2	G	Carbohydrate transport and metabolism	alpha,alpha-trehalose-phosphate synthase [UDP-forming] 6 [Glycine max]
Glyma.08G173400.Wm82.a2.v1	17.8372	5.38138	2.33586e-31	-1.6844	down	--	--	Molecular Function: DNA binding (GO:0003677);; Cellular Component: nucleus (GO:0005634);; Biological Process: regulation of transcription, DNA-templated (GO:0006355);;	K00521|1.1e-34|cmos:111447866|K00521 ferric-chelate reductase [EC:1.16.1.7] | (RefSeq) ferric reduction oxidase 7, chloroplastic-like	--	--	--	No apical meristem (NAM) protein	NAC domain-containing protein 21/22 OS=Arabidopsis thaliana OX=3702 GN=NAC021 PE=1 SV=2	K	Transcription	NAC domain protein [Glycine max]
Glyma.12G222400.Wm82.a2.v1	39.6106	11.5535	2.9617e-22	-1.73226	down	--	--	--	--	--	--	--	Aluminium induced protein	Stem-specific protein TSJT1 OS=Nicotiana tabacum OX=4097 GN=TSJT1 PE=2 SV=1	S	Function unknown	glutamine amidotransferases class-II superfamily protein [Glycine max]
Glyma.04G247800.Wm82.a2.v1	0.412276	1.33823	2.6261e-07	1.72119	up	[TK]	Signal transduction mechanisms;; Transcription	Biological Process: phosphorelay signal transduction system (GO:0000160);;	K14492|3.2e-106|gmx:100801334|K14492 two-component response regulator ARR-A family | (RefSeq) two-component response regulator ORR9	Plant hormone signal transduction (ko04075)	[K]	Transcription	Response regulator receiver domain	Two-component response regulator ORR4 OS=Oryza sativa subsp. indica OX=39946 GN=RR4 PE=2 SV=1	K	Transcription	two-component response regulator ORR9 [Glycine max]
Glyma.12G216900.Wm82.a2.v1	8.97046	20.1707	5.68039e-19	1.20248	up	[C]	Energy production and conversion	Molecular Function: NAD(P)H dehydrogenase (quinone) activity (GO:0003955);; Molecular Function: FMN binding (GO:0010181);; Biological Process: oxidation-reduction process (GO:0055114);;	K03809|6.4e-111|gmx:100499870|K03809 NAD(P)H dehydrogenase (quinone) [EC:1.6.5.2] | (RefSeq) NAD(P)H dehydrogenase (quinone) FQR1-like isoform 1	Ubiquinone and other terpenoid-quinone biosynthesis (ko00130)	[R]	General function prediction only	NADPH-dependent FMN reductase	NAD(P)H dehydrogenase (quinone) FQR1 OS=Arabidopsis thaliana OX=3702 GN=FQR1 PE=1 SV=1	S	Function unknown	NAD(P)H dehydrogenase (quinone) FQR1-like isoform 1 [Glycine max]
Glyma.14G204100.Wm82.a2.v1	0.501575	1.23959	6.01877e-06	1.3281	up	--	--	Molecular Function: transcription factor activity, sequence-specific DNA binding (GO:0003700);; Cellular Component: nucleus (GO:0005634);;	K20557|2.5e-41|qsu:112021095|K20557 transcription factor VIP1 | (RefSeq) transcription factor VIP1-like	MAPK signaling pathway - plant (ko04016)	--	--	bZIP transcription factor	Transcription factor RF2b OS=Oryza sativa subsp. japonica OX=39947 GN=RF2b PE=1 SV=2	K	Transcription	transcription factor RF2b [Glycine max]
Glyma.11G035900.Wm82.a2.v1	6.59166	1.96719	4.49439e-15	-1.70723	down	--	--	Cellular Component: nucleus (GO:0005634);; Biological Process: regulation of transcription, DNA-templated (GO:0006355);; Molecular Function: sequence-specific DNA binding (GO:0043565);;	K09338|4.9e-157|gmx:100783851|K09338 homeobox-leucine zipper protein | (RefSeq) homeobox-leucine zipper protein HAT4	--	[K]	Transcription	HD-ZIP protein N terminus	Homeobox-leucine zipper protein HAT4 OS=Arabidopsis thaliana OX=3702 GN=HAT4 PE=1 SV=1	K	Transcription	homeobox-leucine zipper protein HAT4 [Glycine max]
Glyma.17G082000.Wm82.a2.v1	3.54096	8.4667	2.67897e-16	1.28445	up	--	--	Biological Process: fucose metabolic process (GO:0006004);; Molecular Function: transferase activity, transferring glycosyl groups (GO:0016757);;	K23280|2.1e-247|gmx:100814267|K23280 rhamnogalacturonan I rhamnosyltransferase [EC:2.4.1.351] | (RefSeq) O-fucosyltransferase 34	--	--	--	GDP-fucose protein O-fucosyltransferase	Rhamnogalacturonan I rhamnosyltransferase 1 OS=Arabidopsis thaliana OX=3702 GN=RRT1 PE=1 SV=1	G	Carbohydrate transport and metabolism	hypothetical protein GLYMA_17G082000 [Glycine max]
Glyma.15G268200.Wm82.a2.v1	5.80292	2.52133	0.00905256	-1.14386	down	--	--	Cellular Component: integral component of membrane (GO:0016021);;	--	--	--	--	--	--	--	--	uncharacterized protein LOC100776077 [Glycine max]
Glyma.05G211200.Wm82.a2.v1	0.430111	0.91836	0.00458224	1.10301	up	--	--	Molecular Function: transcription regulatory region sequence-specific DNA binding (GO:0000976);; Molecular Function: transcription factor activity, sequence-specific DNA binding (GO:0003700);; Cellular Component: nucleus (GO:0005634);; Biological Process: cell differentiation (GO:0030154);; Molecular Function: sequence-specific DNA binding (GO:0043565);;	K09422|8.1e-161|ccaj:109805683|K09422 transcription factor MYB, plant | (RefSeq) transcription factor MYB51-like	--	[K]	Transcription	Myb-like DNA-binding domain	Transcription factor MYB61 OS=Arabidopsis thaliana OX=3702 GN=MYB61 PE=2 SV=1	--	--	40S ribosomal protein S10 [Glycine soja]
Glyma.02G186600.Wm82.a2.v1	0.822185	0.319275	1.33389e-05	-1.30086	down	[C]	Energy production and conversion	Molecular Function: glycerol-3-phosphate dehydrogenase [NAD+] activity (GO:0004367);; Biological Process: carbohydrate metabolic process (GO:0005975);; Cellular Component: glycerol-3-phosphate dehydrogenase complex (GO:0009331);; Biological Process: glycerol-3-phosphate catabolic process (GO:0046168);; Molecular Function: NAD binding (GO:0051287);;	K00006|4.3e-264|gmx:100797552|K00006 glycerol-3-phosphate dehydrogenase (NAD+) [EC:1.1.1.8] | (RefSeq) probable glycerol-3-phosphate dehydrogenase [NAD(+)] 1, cytosolic	Glycerophospholipid metabolism (ko00564)	[C]	Energy production and conversion	NAD-dependent glycerol-3-phosphate dehydrogenase C-terminus	Glycerol-3-phosphate dehydrogenase [NAD(+)] GPDHC1, cytosolic OS=Arabidopsis thaliana OX=3702 GN=GPDHC1 PE=2 SV=1	C	Energy production and conversion	probable glycerol-3-phosphate dehydrogenase [NAD(+)] 1, cytosolic [Glycine max]
Glyma.15G199700.Wm82.a2.v1	7.43585	1.06402	1.35738e-19	-2.73436	down	--	--	Molecular Function: structural constituent of cell wall (GO:0005199);; Cellular Component: extracellular region (GO:0005576);;	--	--	--	--	Extensin-like protein repeat	Repetitive proline-rich cell wall protein 2 OS=Glycine max OX=3847 GN=PRP2 PE=2 SV=1	O	Posttranslational modification, protein turnover, chaperones	repetitive proline-rich cell wall protein 2 [Glycine max]
Glyma.15G151100.Wm82.a2.v1	2.27795	0.797032	0.00184429	-1.48861	down	--	--	--	--	--	--	--	--	--	--	--	hypothetical protein glysoja_037385 [Glycine soja]
Glyma.09G053100.Wm82.a2.v1	2.36962	4.99723	0.017235	1.10932	up	--	--	--	--	--	--	--	--	--	--	--	hypothetical protein GLYMA_09G053100 [Glycine max]
Glyma.10G139800.Wm82.a2.v1	4.36201	16.2941	4.33572e-22	1.93324	up	[G]	Carbohydrate transport and metabolism	Cellular Component: cell wall (GO:0005618);; Cellular Component: plasmodesma (GO:0009506);; Biological Process: plasmodesmata-mediated intercellular transport (GO:0010497);; Molecular Function: manganese ion binding (GO:0030145);; Molecular Function: nutrient reservoir activity (GO:0045735);; Cellular Component: apoplast (GO:0048046);; Biological Process: regulation of root development (GO:200028…	--	--	--	--	Cupin	Germin-like protein subfamily 2 member 4 OS=Arabidopsis thaliana OX=3702 GN=GLP10 PE=2 SV=1	S	Function unknown	germin-like protein 17 precursor [Glycine max]
Glyma.12G108000.Wm82.a2.v1	3.71443	1.57569	1.0684e-07	-1.19395	down	--	--	Molecular Function: DNA binding (GO:0003677);; Cellular Component: nucleus (GO:0005634);; Cellular Component: cytosol (GO:0005829);;	--	--	--	--	SAND domain	Protein ULTRAPETALA 1 OS=Arabidopsis thaliana OX=3702 GN=ULT1 PE=1 SV=1	S	Function unknown	protein ULTRAPETALA 1 [Glycine max]
Glyma.08G110300.Wm82.a2.v1	0.530311	2.10606	7.79637e-06	1.99914	up	[Q]	Secondary metabolites biosynthesis, transport and catabolism	Biological Process: biosynthetic process (GO:0009058);; Molecular Function: naringenin-chalcone synthase activity (GO:0016210);;	K00660|2.2e-224|gmx:100791524|K00660 chalcone synthase [EC:2.3.1.74] | (RefSeq) CHS3; chalcone synthase 3	Flavonoid biosynthesis (ko00941);; Circadian rhythm - plant (ko04712)	--	--	Chalcone and stilbene synthases, N-terminal domain	Chalcone synthase 3 OS=Glycine max OX=3847 GN=CHS3 PE=3 SV=1	H	Coenzyme transport and metabolism	chalcone synthase 3 [Glycine max]
Glyma.18G250100.Wm82.a2.v1	0.909103	2.11702	4.17973e-06	1.23544	up	[O]	Posttranslational modification, protein turnover, chaperones	Molecular Function: serine-type endopeptidase activity (GO:0004252);;	K15333|1.7e-74|nsy:104224633|K15333 tRNA guanosine-2'-O-methyltransferase [EC:2.1.1.34] | (RefSeq) uncharacterized protein LOC104224633	--	--	--	Subtilase family	Subtilisin-like protease Glyma18g48580 OS=Glycine max OX=3847 GN=Glyma18g48580 PE=1 SV=3	G	Carbohydrate transport and metabolism	subtilisin-like protease Glyma18g48580 [Glycine max]
Glyma.11G215600.Wm82.a2.v1	0.318565	0.683748	0.00118861	1.11239	up	--	--	Cellular Component: condensed chromosome (GO:0000793);; Cellular Component: condensin complex (GO:0000796);; Biological Process: mitotic chromosome condensation (GO:0007076);;	K06678|0.0e+00|gmx:100817677|K06678 condensin complex subunit 3 | (RefSeq) condensin complex subunit 3	--	[BD]	Chromatin structure and dynamics;; Cell cycle control, cell division, chromosome partitioning	Nuclear condensing complex subunits, C-term domain	--	--	--	condensin complex subunit 3 [Glycine max]
Glyma.17G128000.Wm82.a2.v1	13.0211	0.473622	3.81268e-21	-4.72691	down	[C]	Energy production and conversion	Molecular Function: malate synthase activity (GO:0004474);; Cellular Component: cytoplasm (GO:0005737);; Biological Process: glyoxylate cycle (GO:0006097);; Biological Process: tricarboxylic acid cycle (GO:0006099);;	K01638|0.0e+00|gmx:732628|K01638 malate synthase [EC:2.3.3.9] | (RefSeq) MS; malate synthase, glyoxysomal	Pyruvate metabolism (ko00620);; Glyoxylate and dicarboxylate metabolism (ko00630);; Carbon metabolism (ko01200)	[C]	Energy production and conversion	Malate synthase	Malate synthase, glyoxysomal (Fragment) OS=Glycine max OX=3847 PE=2 SV=1	C	Energy production and conversion	malate synthase, glyoxysomal [Glycine max]
Glyma.19G114500.Wm82.a2.v1	38.14	100.306	2.92277e-28	1.43109	up	[E]	Amino acid transport and metabolism	Molecular Function: 5-methyltetrahydropteroyltriglutamate-homocysteine S-methyltransferase activity (GO:0003871);; Cellular Component: extracellular region (GO:0005576);; Cellular Component: cytosol (GO:0005829);; Molecular Function: zinc ion binding (GO:0008270);; Molecular Function: methionine synthase activity (GO:0008705);; Biological Process: methionine biosynthetic process (GO:0009086);;	K00549|0.0e+00|gmx:100802039|K00549 5-methyltetrahydropteroyltriglutamate--homocysteine methyltransferase [EC:2.1.1.14] | (RefSeq) putative cobalamin-independent methionine synthase	Cysteine and methionine metabolism (ko00270);; Selenocompound metabolism (ko00450);; Biosynthesis of amino acids (ko01230)	[E]	Amino acid transport and metabolism	Cobalamin-independent synthase, Catalytic domain	5-methyltetrahydropteroyltriglutamate--homocysteine methyltransferase 1 OS=Arabidopsis thaliana OX=3702 GN=MS1 PE=1 SV=1	E	Amino acid transport and metabolism	putative cobalamin-independent methionine synthase [Glycine max]
Glyma.01G178700.Wm82.a2.v1	1.69167	4.21291	6.30787e-10	1.33739	up	[M]	Cell wall/membrane/envelope biogenesis	Cellular Component: Golgi apparatus (GO:0005794);; Cellular Component: integral component of membrane (GO:0016021);; Molecular Function: transferase activity, transferring glycosyl groups (GO:0016757);;	K20893|4.1e-198|gmx:100783054|K20893 probable galacturonosyltransferase-like 1 [EC:2.4.1.-] | (RefSeq) probable galacturonosyltransferase-like 2	--	--	--	Glycosyl transferase family 8	Probable galacturonosyltransferase-like 1 OS=Arabidopsis thaliana OX=3702 GN=GATL1 PE=2 SV=1	G	Carbohydrate transport and metabolism	probable galacturonosyltransferase-like 2 [Glycine max]
Glyma.17G046600.Wm82.a2.v1	0.282194	0.830681	0.000126978	1.58359	up	[P]	Inorganic ion transport and metabolism	Molecular Function: N,N-dimethylaniline monooxygenase activity (GO:0004499);; Molecular Function: flavin adenine dinucleotide binding (GO:0050660);; Molecular Function: NADP binding (GO:0050661);;	K11816|1.5e-23|mtr:MTR_1g069275|K11816 indole-3-pyruvate monooxygenase [EC:1.14.13.168] | (RefSeq) indole-3-pyruvate monooxygenase	Tryptophan metabolism (ko00380)	[Q]	Secondary metabolites biosynthesis, transport and catabolism	Flavin-binding monooxygenase-like	Probable flavin-containing monooxygenase 1 OS=Arabidopsis thaliana OX=3702 GN=FMO1 PE=2 SV=1	Q	Secondary metabolites biosynthesis, transport and catabolism	probable flavin-containing monooxygenase 1 [Glycine max]
Glyma.03G101200.Wm82.a2.v1	0.970029	0.152404	1.54469e-07	-2.56124	down	[I]	Lipid transport and metabolism	Molecular Function: iron ion binding (GO:0005506);; Biological Process: lipid biosynthetic process (GO:0008610);; Cellular Component: membrane (GO:0016020);; Molecular Function: oxidoreductase activity (GO:0016491);;	K15404|0.0e+00|ccaj:109790836|K15404 aldehyde decarbonylase [EC:4.1.99.5] | (RefSeq) protein ECERIFERUM 1-like	Cutin, suberine and wax biosynthesis (ko00073)	--	--	WAX2 C-terminal domain	Very-long-chain aldehyde decarbonylase CER1 OS=Arabidopsis thaliana OX=3702 GN=CER1 PE=1 SV=1	S	Function unknown	hypothetical protein GLYMA_03G101200 [Glycine max]
Glyma.14G058500.Wm82.a2.v1	0.972448	2.79558	1.18035e-08	1.56621	up	--	--	Cellular Component: Golgi apparatus (GO:0005794);; Cellular Component: integral component of membrane (GO:0016021);; Molecular Function: O-acetyltransferase activity (GO:0016413);;	K23877|6.3e-38|soe:110782899|K23877 xyloglucan O-acetyltransferase | (RefSeq) protein ALTERED XYLOGLUCAN 4 isoform X1	--	--	--	GDSL/SGNH-like Acyl-Esterase family found in Pmr5 and Cas1p	Protein ESKIMO 1 OS=Arabidopsis thaliana OX=3702 GN=ESK1 PE=1 SV=1	S	Function unknown	protein ESKIMO 1-like [Glycine max]
Glyma.10G061000.Wm82.a2.v1	82.2105	261.037	6.38714e-09	1.69502	up	--	--	Cellular Component: extracellular region (GO:0005576);; Biological Process: defense response (GO:0006952);;	K12173|7.1e-40|gmx:100794341|K12173 BRCA1-A complex subunit BRE | (RefSeq) BRISC and BRCA1-A complex member 2	Homologous recombination (ko03440)	--	--	Thaumatin family	Thaumatin-like protein 1a OS=Malus domestica OX=3750 GN=TL1 PE=1 SV=1	T	Signal transduction mechanisms	hypothetical protein GLYMA_10G061000 [Glycine max]
Glyma.17G036400.Wm82.a2.v1	12.3007	3.08097	5.17889e-19	-1.96292	down	--	--	Molecular Function: pectinesterase activity (GO:0030599);; Molecular Function: pectinesterase inhibitor activity (GO:0046910);;	--	--	--	--	Plant invertase/pectin methylesterase inhibitor	--	S	Function unknown	cell wall / vacuolar inhibitor of fructosidase precursor [Glycine max]
Glyma.10G228900.Wm82.a2.v1	0.470894	0.116459	2.47286e-08	-1.89557	down	--		Molecular Function: protein serine/threonine kinase activity (GO:0004674);; Molecular Function: ATP binding (GO:0005524);; Cellular Component: integral component of membrane (GO:0016021);; Biological Process: recognition of pollen (GO:0048544);;	K13418|7.5e-60|cmax:111479323|K13418 somatic embryogenesis receptor kinase 1 [EC:2.7.10.1 2.7.11.1] | (RefSeq) somatic embryogenesis receptor kinase 2-like	--	--	--	Protein kinase domain	G-type lectin S-receptor-like serine/threonine-protein kinase At5g24080 OS=Arabidopsis thaliana OX=3702 GN=At5g24080 PE=2 SV=1	T	Signal transduction mechanisms	G-type lectin S-receptor-like serine/threonine-protein kinase At5g24080 isoform X1 [Glycine max]
Glyma.19G217800.Wm82.a2.v1	2.85566	1.26748	1.01211e-05	-1.12596	down	--	--	Molecular Function: transcription factor activity, sequence-specific DNA binding (GO:0003700);; Cellular Component: nucleus (GO:0005634);; Molecular Function: sequence-specific DNA binding (GO:0043565);;	K12835|1.0e-48|cmax:111493042|K12835 ATP-dependent RNA helicase DDX42 [EC:3.6.4.13] | (RefSeq) DEAD-box ATP-dependent RNA helicase 24 isoform X1	Spliceosome (ko03040)	--	--	WRKY DNA -binding domain	WRKY transcription factor 23 OS=Arabidopsis thaliana OX=3702 GN=WRKY23 PE=2 SV=1	K	Transcription	WRKY transcription factor 23 [Glycine max]
Glyma.18G254300.Wm82.a2.v1	2.30836	5.049	1.80218e-13	1.16403	up	[M]	Cell wall/membrane/envelope biogenesis	Molecular Function: protein kinase activity (GO:0004672);; Molecular Function: ATP binding (GO:0005524);; Cellular Component: plasma membrane (GO:0005886);; Biological Process: hormone-mediated signaling pathway (GO:0009755);; Cellular Component: integral component of membrane (GO:0016021);;	K13415|3.0e-100|han:110929858|K13415 protein brassinosteroid insensitive 1 [EC:2.7.10.1 2.7.11.1] | (RefSeq) systemin receptor SR160-like	Plant hormone signal transduction (ko04075)	--	--	Protein kinase domain	MDIS1-interacting receptor like kinase 2 OS=Arabidopsis thaliana OX=3702 GN=MIK2 PE=1 SV=3	--	--	probable leucine-rich repeat receptor-like protein kinase At1g35710 [Glycine max]
Glyma.02G253900.Wm82.a2.v1	6.26047	2.45709	1.60891e-12	-1.30799	down	--	--	Cellular Component: integral component of membrane (GO:0016021);;	--	--	--	--	HAD superfamily, subfamily IIIB (Acid phosphatase)	Uncharacterized protein At2g39920 OS=Arabidopsis thaliana OX=3702 GN=At2g39920 PE=2 SV=2	S	Function unknown	haloacid dehalogenase superfamily protein [Glycine max]
Glyma.02G274400.Wm82.a2.v1	21.9489	3.76903	1.57622e-11	-2.4877	down	--	--	Cellular Component: integral component of membrane (GO:0016021);;	--	--	--	--	Late embryogenesis abundant protein	NDR1/HIN1-like protein 13 OS=Arabidopsis thaliana OX=3702 GN=NHL13 PE=2 SV=1	S	Function unknown	NDR1/HIN1-like protein 13 [Glycine max]
Glyma.09G040800.Wm82.a2.v1	2.7116	0.283164	8.02756e-16	-3.11082	down	--	--	Molecular Function: protein phosphatase inhibitor activity (GO:0004864);; Cellular Component: nucleus (GO:0005634);; Cellular Component: cytoplasm (GO:0005737);; Biological Process: defense response (GO:0006952);; Biological Process: abscisic acid-activated signaling pathway (GO:0009738);; Molecular Function: abscisic acid binding (GO:0010427);; Molecular Function: signaling receptor activity (GO…	--	--	--	--	Pathogenesis-related protein Bet v 1 family	Major allergen Pru ar 1 OS=Prunus armeniaca OX=36596 PE=1 SV=1	S	Function unknown	SRPBCC ligand-binding domain superfamily protein [Glycine max]
Glyma.08G100700.Wm82.a2.v1	2.34491	1.10346	0.000737923	-1.04049	down	--	--	Biological Process: protein ubiquitination (GO:0016567);; Molecular Function: ubiquitin protein ligase activity (GO:0061630);;	--	--	[O]	Posttranslational modification, protein turnover, chaperones	Ring finger domain	E3 ubiquitin-protein ligase AIRP2 OS=Arabidopsis thaliana OX=3702 GN=AIRP2 PE=1 SV=1	O	Posttranslational modification, protein turnover, chaperones	E3 ubiquitin-protein ligase AIRP2 [Glycine max]
Glyma.18G300300.Wm82.a2.v1	2.19561	0.745104	6.02579e-15	-1.51847	down	--	--	Molecular Function: ubiquitin-protein transferase activity (GO:0004842);; Molecular Function: zinc ion binding (GO:0008270);;	K10260|4.0e-10|cre:CHLREDRAFT_205525|K10260 F-box and WD-40 domain protein 7 | (RefSeq) predicted protein	Ubiquitin mediated proteolysis (ko04120)	[S]	Function unknown	U-box domain	Putative E3 ubiquitin-protein ligase LIN-1 OS=Lotus japonicus OX=34305 GN=CERBERUS PE=2 SV=2	S	Function unknown	putative E3 ubiquitin-protein ligase LIN-1 isoform X1 [Glycine max]
Glyma.01G009000.Wm82.a2.v1	1.58259	0.772534	0.00613212	-1.01564	down	--	--	--	--	--	--	--	Cotton fibre expressed protein	--	S	Function unknown	uncharacterized protein LOC100802495 [Glycine max]
Glyma.15G143600.Wm82.a2.v1	10.3653	25.7322	1.28432e-20	1.34813	up	[G]	Carbohydrate transport and metabolism	Molecular Function: chitinase activity (GO:0004568);; Biological Process: carbohydrate metabolic process (GO:0005975);; Biological Process: chitin catabolic process (GO:0006032);; Biological Process: cell wall macromolecule catabolic process (GO:0016998);;	K20547|1.2e-50|thj:104824946|K20547 basic endochitinase B [EC:3.2.1.14] | (RefSeq) endochitinase CH25	Amino sugar and nucleotide sugar metabolism (ko00520);; MAPK signaling pathway - plant (ko04016)	[R]	General function prediction only	Chitinase class I	Chitinase-like protein 2 OS=Arabidopsis thaliana OX=3702 GN=CTL2 PE=2 SV=1	S	Function unknown	chitinase-like protein 2 [Glycine soja]
Glyma.09G038600.Wm82.a2.v1	44.1157	17.1945	1.49633e-05	-1.32071	down	[G]	Carbohydrate transport and metabolism	Molecular Function: hydrolase activity, hydrolyzing O-glycosyl compounds (GO:0004553);; Molecular Function: xylan 1,4-beta-xylosidase activity (GO:0009044);; Cellular Component: plant-type cell wall (GO:0009505);; Biological Process: arabinan catabolic process (GO:0031222);; Biological Process: xylan catabolic process (GO:0045493);; Molecular Function: alpha-L-arabinofuranosidase activity (GO:004…	K15920|4.9e-268|nnu:104600010|K15920 xylan 1,4-beta-xylosidase [EC:3.2.1.37] | (RefSeq) beta-xylosidase/alpha-L-arabinofuranosidase 2-like	Amino sugar and nucleotide sugar metabolism (ko00520)	--	--	Glycosyl hydrolase family 3 C-terminal domain	Beta-D-xylosidase 1 OS=Arabidopsis thaliana OX=3702 GN=BXL1 PE=1 SV=1	G	Carbohydrate transport and metabolism	beta-D-xylosidase 1 [Glycine max]
Glyma.01G230900.Wm82.a2.v1	6.71168	19.2206	4.797e-29	1.55569	up	[C]	Energy production and conversion	Cellular Component: mitochondrial intermembrane space (GO:0005758);; Biological Process: mitochondrial electron transport, ubiquinol to cytochrome c (GO:0006122);; Biological Process: mitochondrial electron transport, cytochrome c to oxygen (GO:0006123);; Molecular Function: electron carrier activity (GO:0009055);; Molecular Function: heme binding (GO:0020037);; Molecular Function: metal ion bind…	--	--	[C]	Energy production and conversion	Cytochrome c	Cytochrome c-2 OS=Arabidopsis thaliana OX=3702 GN=CYTC-2 PE=1 SV=1	C	Energy production and conversion	uncharacterized protein LOC100305937 [Glycine max]
Glyma.18G211100.Wm82.a2.v1	19.036	7.62889	6.63773e-16	-1.28196	down	--	--	Molecular Function: peroxidase activity (GO:0004601);; Cellular Component: extracellular region (GO:0005576);; Biological Process: response to oxidative stress (GO:0006979);; Molecular Function: heme binding (GO:0020037);; Biological Process: hydrogen peroxide catabolic process (GO:0042744);; Molecular Function: metal ion binding (GO:0046872);;	K00430|4.6e-180|gmx:100800219|K00430 peroxidase [EC:1.11.1.7] | (RefSeq) cationic peroxidase 1	Phenylpropanoid biosynthesis (ko00940)	--	--	Peroxidase	Cationic peroxidase 1 OS=Arachis hypogaea OX=3818 GN=PNC1 PE=1 SV=2	Q	Secondary metabolites biosynthesis, transport and catabolism	cationic peroxidase 1 [Glycine max]
Glyma.03G185100.Wm82.a2.v1	3.12148	1.27425	4.69377e-09	-1.25954	down	--	--	Cellular Component: membrane (GO:0016020);; Cellular Component: integral component of membrane (GO:0016021);;	--	--	--	--	Nodulin-like	--	S	Function unknown	uncharacterized protein LOC100797779 [Glycine max]
Glyma.20G049800.Wm82.a2.v1	1.54563	0.355827	5.41592e-08	-2.04923	down	--	--	Cellular Component: integral component of membrane (GO:0016021);;	--	--	--	--	Probable lipid transfer	Non-specific lipid transfer protein GPI-anchored 2 OS=Arabidopsis thaliana OX=3702 GN=LTPG2 PE=2 SV=1	S	Function unknown	non-specific lipid transfer protein GPI-anchored 2 [Glycine max]
Glyma.06G187000.Wm82.a2.v1	0.780716	2.0216	1.01211e-05	1.41635	up	[T]	Signal transduction mechanisms	Biological Process: phosphorelay signal transduction system (GO:0000160);;	K14492|3.9e-108|gmx:100819165|K14492 two-component response regulator ARR-A family | (RefSeq) two-component response regulator ARR6	Plant hormone signal transduction (ko04075)	[K]	Transcription	Response regulator receiver domain	Two-component response regulator ARR6 OS=Arabidopsis thaliana OX=3702 GN=ARR6 PE=1 SV=2	K	Transcription	two-component response regulator ARR6 [Glycine max]
Glyma.17G242400.Wm82.a2.v1	9.89034	2.87221	2.51393e-09	-1.73057	down	[G]	Carbohydrate transport and metabolism	Molecular Function: alpha-amylase activity (GO:0004556);; Molecular Function: calcium ion binding (GO:0005509);; Biological Process: carbohydrate metabolic process (GO:0005975);; Biological Process: response to abscisic acid (GO:0009737);; Biological Process: response to gibberellin (GO:0009739);; Cellular Component: apoplast (GO:0048046);; Molecular Function: alpha-amylase activity (releasing ma…	K01176|4.9e-251|gmx:100815664|K01176 alpha-amylase [EC:3.2.1.1] | (RefSeq) alpha-amylase-like precursor	Starch and sucrose metabolism (ko00500)	[G]	Carbohydrate transport and metabolism	Alpha-amylase C-terminal beta-sheet domain	Alpha-amylase OS=Vigna mungo OX=3915 GN=AMY1.1 PE=2 SV=1	G	Carbohydrate transport and metabolism	alpha-amylase-like precursor [Glycine max]
Glyma.01G047900.Wm82.a2.v1	1.98385	3.8786	2.77836e-05	1.00013	up	--	--	Molecular Function: DNA binding (GO:0003677);;	K15777|3.1e-29|mesc:110630336|K15777 4,5-DOPA dioxygenase extradiol [EC:1.13.11.-] | (RefSeq) uncharacterized protein LOC110630336	Betalain biosynthesis (ko00965)	--	--	ZF-HD protein dimerisation region	Zinc-finger homeodomain protein 11 OS=Arabidopsis thaliana OX=3702 GN=ZHD11 PE=1 SV=1	K	Transcription	zinc-finger homeodomain protein 11 [Glycine max]
Glyma.04G107500.Wm82.a2.v1	11.4907	23.4259	1.42936e-11	1.06784	up	[O]	Posttranslational modification, protein turnover, chaperones	Molecular Function: glutathione transferase activity (GO:0004364);;	K00799|5.3e-127|gmx:547582|K00799 glutathione S-transferase [EC:2.5.1.18] | (RefSeq) GSTU13; glutathione S-transferase GST 13	Glutathione metabolism (ko00480)	[O]	Posttranslational modification, protein turnover, chaperones	Glutathione S-transferase, N-terminal domain	Probable glutathione S-transferase OS=Glycine max OX=3847 GN=HSP26-A PE=2 SV=1	O	Posttranslational modification, protein turnover, chaperones	glutathione S-transferase GST 13 [Glycine max]
Glyma.17G151200.Wm82.a2.v1	3.94853	0.313434	2.57015e-20	-3.60996	down	--	--	Molecular Function: pectinesterase activity (GO:0030599);; Molecular Function: pectinesterase inhibitor activity (GO:0046910);;	K15334|1.2e-07|psom:113357906|K15334 multisite-specific tRNA:(cytosine-C5)-methyltransferase [EC:2.1.1.202] | (RefSeq) tRNA (cytosine(34)-C(5))-methyltransferase-like	--	--	--	Plant invertase/pectin methylesterase inhibitor	Putative invertase inhibitor OS=Platanus acerifolia OX=140101 PE=1 SV=1	S	Function unknown	putative invertase inhibitor [Glycine max]
Glyma.13G316000.Wm82.a2.v1	0.352253	0.702284	0.0151336	1.05176	up	--	--	Biological Process: signal transduction (GO:0007165);;	K20642|1.6e-209|gmx:100798012|K20642 Rho GTPase-activating protein 22/24/25 | (RefSeq) rho GTPase-activating protein 5	--	[T]	Signal transduction mechanisms	RhoGAP domain	Rho GTPase-activating protein 1 OS=Arabidopsis thaliana OX=3702 GN=ROPGAP1 PE=2 SV=1	T	Signal transduction mechanisms	rho GTPase-activating protein 5 [Glycine max]
Glyma.08G194100.Wm82.a2.v1	0.225948	0.836278	0.000218019	1.80069	up	[I]	Lipid transport and metabolism	Molecular Function: phospholipase D activity (GO:0004630);; Molecular Function: calcium ion binding (GO:0005509);; Cellular Component: plasma membrane (GO:0005886);; Biological Process: phospholipid catabolic process (GO:0009395);; Biological Process: phosphatidylcholine metabolic process (GO:0046470);; Molecular Function: N-acylphosphatidylethanolamine-specific phospholipase D activity (GO:00702…	K01115|0.0e+00|gmx:100812642|K01115 phospholipase D1/2 [EC:3.1.4.4] | (RefSeq) phospholipase D alpha 4 isoform X2	Glycerophospholipid metabolism (ko00564);; Ether lipid metabolism (ko00565);; Endocytosis (ko04144)	[I]	Lipid transport and metabolism	Phospholipase D C terminal	Phospholipase D alpha 4 OS=Arabidopsis thaliana OX=3702 GN=PLDALPHA4 PE=2 SV=1	I	Lipid transport and metabolism	phospholipase D alpha 4 isoform X1 [Glycine max]
Glyma.04G198600.Wm82.a2.v1	173.503	79.6676	1.91675e-14	-1.08542	down	--	--	Biological Process: carbohydrate transport (GO:0008643);; Cellular Component: integral component of membrane (GO:0016021);;	K15382|4.8e-112|gmx:100810426|K15382 solute carrier family 50 (sugar transporter) | (RefSeq) GMSWEET15; sugar efflux transporter SWEET15	--	[R]	General function prediction only	Sugar efflux transporter for intercellular exchange	Bidirectional sugar transporter SWEET14 OS=Oryza sativa subsp. indica OX=39946 GN=SWEET14 PE=2 SV=1	U	Intracellular trafficking, secretion, and vesicular transport	hypothetical protein GLYMA_04G198600 [Glycine max]
Glyma.09G025300.Wm82.a2.v1	0.492482	1.01415	2.15015e-05	1.06968	up	[L]	Replication, recombination and repair	Molecular Function: DNA binding (GO:0003677);; Molecular Function: RNA binding (GO:0003723);; Molecular Function: ribonuclease III activity (GO:0004525);; Molecular Function: ATP binding (GO:0005524);; Cellular Component: nucleus (GO:0005634);; Cellular Component: cytoplasm (GO:0005737);; Cellular Component: RISC complex (GO:0016442);; Biological Process: production of siRNA involved in RNA inter…	K11592|0.0e+00|gmx:100792448|K11592 endoribonuclease Dicer [EC:3.1.26.-] | (RefSeq) GMDCL2B; endoribonuclease Dicer homolog 2 isoform X1	--	[A]	RNA processing and modification	Ribonuclease III domain	Endoribonuclease Dicer homolog 2 OS=Arabidopsis thaliana OX=3702 GN=At3g03300 PE=1 SV=2	A	RNA processing and modification	endoribonuclease Dicer homolog 2 isoform X1 [Glycine max]
Glyma.14G126200.Wm82.a2.v1	11.1941	22.5447	2.05654e-07	1.04345	up	--	--	--	K03097|7.2e-12|aip:107623262|K03097 casein kinase II subunit alpha [EC:2.7.11.1] | (RefSeq) casein kinase II subunit alpha-like isoform X2	Ribosome biogenesis in eukaryotes (ko03008);; Circadian rhythm - plant (ko04712)	--	--	Protein of unknown function (DUF642)	--	S	Function unknown	uncharacterized protein LOC100776765 [Glycine max]
Glyma.06G283800.Wm82.a2.v1	1.94821	5.3317	2.81858e-06	1.48756	up	--	--	Molecular Function: molecular_function (GO:0003674);; Molecular Function: catalytic activity (GO:0003824);; Cellular Component: cellular_component (GO:0005575);; Cellular Component: intracellular (GO:0005622);; Cellular Component: cell (GO:0005623);; Cellular Component: cytoplasm (GO:0005737);; Cellular Component: vacuole (GO:0005773);; Cellular Component: Golgi apparatus (GO:0005794);; Cellular …	K23877|1.4e-36|atr:110006708|K23877 xyloglucan O-acetyltransferase | (RefSeq) protein ALTERED XYLOGLUCAN 4-like	--	--	--	GDSL/SGNH-like Acyl-Esterase family found in Pmr5 and Cas1p	Protein trichome birefringence-like 39 OS=Arabidopsis thaliana OX=3702 GN=TBL39 PE=2 SV=1	S	Function unknown	protein trichome birefringence-like 39 [Glycine max]
Glyma.17G047900.Wm82.a2.v1	1.76609	0.822884	9.83258e-07	-1.07114	down	[T]	Signal transduction mechanisms	Molecular Function: protein kinase activity (GO:0004672);; Molecular Function: ATP binding (GO:0005524);; Cellular Component: integral component of membrane (GO:0016021);;	K13415|1.1e-41|lja:Lj1g3v1222380.1|K13415 protein brassinosteroid insensitive 1 [EC:2.7.10.1 2.7.11.1] | (RefSeq) Lj1g3v1222380.1; -	Plant hormone signal transduction (ko04075)	--	--	Protein kinase domain	Pollen receptor-like kinase 3 OS=Arabidopsis thaliana OX=3702 GN=PRK3 PE=1 SV=1	T	Signal transduction mechanisms	pollen receptor-like kinase 3 [Glycine max]
Glyma.13G357100.Wm82.a2.v1	0.576171	1.18575	0.000395869	1.06747	up	--	--	Cellular Component: nucleus (GO:0005634);; Biological Process: regulation of transcription, DNA-templated (GO:0006355);; Molecular Function: lipid binding (GO:0008289);; Molecular Function: sequence-specific DNA binding (GO:0043565);;	K09338|0.0e+00|gmx:100808292|K09338 homeobox-leucine zipper protein | (RefSeq) homeobox-leucine zipper protein GLABRA 2	--	--	--	START domain	Homeobox-leucine zipper protein GLABRA 2 OS=Arabidopsis thaliana OX=3702 GN=GL2 PE=1 SV=3	K	Transcription	homeobox-leucine zipper protein GLABRA 2 [Glycine max]
Glyma.06G131800.Wm82.a2.v1	4.17366	1.56996	3.98776e-12	-1.36717	down	--	--	Cellular Component: integral component of plasma membrane (GO:0005887);; Molecular Function: oligopeptide transmembrane transporter activity (GO:0035673);;	--	--	[T]	Signal transduction mechanisms	OPT oligopeptide transporter protein	Oligopeptide transporter 9 OS=Arabidopsis thaliana OX=3702 GN=OPT9 PE=2 SV=1	T	Signal transduction mechanisms	oligopeptide transporter 6 [Glycine max]
Glycine_max_newGene_2093	0.523261	1.84889	2.32235e-06	1.80782	up	--	--	--	--	--	--	--	--	--	--	--	matrix metalloproteinase-21-like [Glycine soja]
Glyma.15G084300.Wm82.a2.v1	0.22285	0.70026	2.42479e-05	1.65646	up	--	--	Biological Process: fucose metabolic process (GO:0006004);; Cellular Component: integral component of membrane (GO:0016021);; Molecular Function: transferase activity, transferring glycosyl groups (GO:0016757);;	K23280|6.0e-69|var:108336062|K23280 rhamnogalacturonan I rhamnosyltransferase [EC:2.4.1.351] | (RefSeq) uncharacterized protein At1g04910	--	--	--	GDP-fucose protein O-fucosyltransferase	O-fucosyltransferase 8 OS=Arabidopsis thaliana OX=3702 GN=OFUT8 PE=2 SV=1	G	Carbohydrate transport and metabolism	O-fucosyltransferase 8 [Glycine max]
Glyma.07G125600.Wm82.a2.v1	43.161	11.5377	3.61006e-16	-1.863	down	--	--	--	--	--	[K]	Transcription	--	--	K	Transcription	uncharacterized protein LOC100775516 [Glycine max]
Glyma.18G034900.Wm82.a2.v1	0.766747	0.310117	0.00051288	-1.18146	down	--	--	Cellular Component: nucleus (GO:0005634);; Cellular Component: cytoplasm (GO:0005737);; Biological Process: mRNA processing (GO:0006397);; Molecular Function: nucleotidyltransferase activity (GO:0016779);; Molecular Function: RNA uridylyltransferase activity (GO:0050265);; Biological Process: RNA 3' uridylation (GO:0071076);;	K15919|5.3e-19|cic:CICLE_v10023615mg|K15919 glyoxylate/hydroxypyruvate reductase [EC:1.1.1.79 1.1.1.81] | (RefSeq) hypothetical protein	Glycine, serine and threonine metabolism (ko00260);; Glyoxylate and dicarboxylate metabolism (ko00630);; Carbon metabolism (ko01200)	[D]	Cell cycle control, cell division, chromosome partitioning	TUTase nucleotidyltransferase domain	Protein HESO1 OS=Arabidopsis thaliana OX=3702 GN=HESO1 PE=1 SV=1	D	Cell cycle control, cell division, chromosome partitioning	protein HESO1 isoform X1 [Glycine max]
Glyma.14G191300.Wm82.a2.v1	35.1386	15.9319	1.30835e-18	-1.09827	down	[E]	Amino acid transport and metabolism	Molecular Function: peptide:proton symporter activity (GO:0015333);; Cellular Component: integral component of membrane (GO:0016021);; Molecular Function: oligopeptide transmembrane transporter activity (GO:0035673);; Molecular Function: peptide transmembrane transporter activity (GO:1904680);;	K14638|0.0e+00|gmx:100786202|K14638 solute carrier family 15 (peptide/histidine transporter), member 3/4 | (RefSeq) protein NRT1/ PTR FAMILY 8.1	--	[E]	Amino acid transport and metabolism	POT family	Protein NRT1/ PTR FAMILY 8.1 OS=Arabidopsis thaliana OX=3702 GN=NPF8.1 PE=1 SV=1	E	Amino acid transport and metabolism	protein NRT1/ PTR FAMILY 8.1 [Glycine max]
Glyma.04G227900.Wm82.a2.v1	16.4712	60.7014	8.17915e-55	1.89961	up	[Q]	Secondary metabolites biosynthesis, transport and catabolism	Molecular Function: metal ion binding (GO:0046872);; Molecular Function: dioxygenase activity (GO:0051213);;	K24028|4.2e-200|gmx:100782253|K24028 salicylic acid 3-hydroxylase [EC:1.14.11.-] | (RefSeq) protein DOWNY MILDEW RESISTANCE 6	--	[QR]	Secondary metabolites biosynthesis, transport and catabolism;; General function prediction only	2OG-Fe(II) oxygenase superfamily	Protein DOWNY MILDEW RESISTANCE 6 OS=Arabidopsis thaliana OX=3702 GN=DMR6 PE=1 SV=1	Q	Secondary metabolites biosynthesis, transport and catabolism	protein DOWNY MILDEW RESISTANCE 6 [Glycine max]
Glyma.02G027800.Wm82.a2.v1	1.13351	2.80289	4.82688e-05	1.33207	up	[O]	Posttranslational modification, protein turnover, chaperones	Molecular Function: metalloendopeptidase activity (GO:0004222);; Molecular Function: zinc ion binding (GO:0008270);; Cellular Component: integral component of membrane (GO:0016021);; Biological Process: extracellular matrix organization (GO:0030198);; Biological Process: collagen catabolic process (GO:0030574);; Cellular Component: extracellular matrix (GO:0031012);;	K07761|4.1e-103|han:110896101|K07761 metalloendoproteinase 5-MMP [EC:3.4.24.-] | (RefSeq) metalloendoproteinase 5-MMP-like	--	[OW]	Posttranslational modification, protein turnover, chaperones;; Extracellular structures	Matrixin	Metalloendoproteinase 3-MMP OS=Arabidopsis thaliana OX=3702 GN=3MMP PE=1 SV=1	O	Posttranslational modification, protein turnover, chaperones	metalloendoproteinase 3-MMP [Glycine max]
Glyma.03G210500.Wm82.a2.v1	1.58351	0.513885	4.99704e-05	-1.53836	down	--	--	Molecular Function: electron carrier activity (GO:0009055);; Molecular Function: protein disulfide oxidoreductase activity (GO:0015035);;	K03676|2.0e-52|gmx:100775606|K03676 glutaredoxin 3 | (RefSeq) monothiol glutaredoxin-S6	--	[O]	Posttranslational modification, protein turnover, chaperones	Glutaredoxin	Monothiol glutaredoxin-S6 OS=Arabidopsis thaliana OX=3702 GN=GRXS6 PE=3 SV=1	O	Posttranslational modification, protein turnover, chaperones	monothiol glutaredoxin-S6 [Glycine max]
Glyma.11G210400.Wm82.a2.v1	2.11973	4.99394	4.10125e-10	1.28854	up	[H]	Coenzyme transport and metabolism	Cellular Component: integral component of membrane (GO:0016021);; Molecular Function: transferase activity, transferring alkyl or aryl (other than methyl) groups (GO:0016765);;	K09833|1.3e-232|gmx:100787771|K09833 homogentisate phytyltransferase / homogentisate geranylgeranyltransferase [EC:2.5.1.115 2.5.1.116] | (RefSeq) glycinol 4-dimethylallyltransferase-like isoform X1	Ubiquinone and other terpenoid-quinone biosynthesis (ko00130)	--	--	UbiA prenyltransferase family	Glycinol 4-dimethylallyltransferase OS=Glycine max OX=3847 GN=G4DT PE=1 SV=1	H	Coenzyme transport and metabolism	glycinol 4-dimethylallyltransferase-like isoform X1 [Glycine max]
Glyma.06G158000.Wm82.a2.v1	0.988286	0.262741	5.61966e-08	-1.73841	down	[J]	Translation, ribosomal structure and biogenesis	Molecular Function: hydrolase activity (GO:0016787);;	K02433|2.3e-50|psom:113275959|K02433 aspartyl-tRNA(Asn)/glutamyl-tRNA(Gln) amidotransferase subunit A [EC:6.3.5.6 6.3.5.7] | (RefSeq) glutamyl-tRNA(Gln) amidotransferase subunit A, chloroplastic/mitochondrial-like	Aminoacyl-tRNA biosynthesis (ko00970)	[J]	Translation, ribosomal structure and biogenesis	Amidase	Fatty acid amide hydrolase OS=Medicago truncatula OX=3880 GN=FAAH PE=1 SV=1	J	Translation, ribosomal structure and biogenesis	fatty acid amide hydrolase [Glycine max]
Glycine_max_newGene_2057	0.38319	1.13384	0.000464598	1.5063	up	--	--	Cellular Component: integral component of membrane (GO:0016021);;	--	--	--	--	--	--	S	Function unknown	serine/threonine-protein phosphatase 7 long form homolog [Glycine max]
Glyma.10G157900.Wm82.a2.v1	1.67203	4.33681	9.90857e-09	1.40993	up	--	--	Cellular Component: integral component of membrane (GO:0016021);;	--	--	--	--	--	--	--	--	golgin IMH1 [Glycine max]
Glyma.19G149500.Wm82.a2.v1	0.393006	0.854012	0.000120204	1.12817	up	--	--	Biological Process: mitotic cell cycle (GO:0000278);; Cellular Component: spindle pole (GO:0000922);; Cellular Component: equatorial microtubule organizing center (GO:0000923);; Cellular Component: gamma-tubulin complex (GO:0000930);; Cellular Component: cytoplasm (GO:0005737);; Cellular Component: microtubule (GO:0005874);; Cellular Component: gamma-tubulin small complex (GO:0008275);; Biologica…	K16570|0.0e+00|gmx:100811956|K16570 gamma-tubulin complex component 3 | (RefSeq) gamma-tubulin complex component 3	--	[Z]	Cytoskeleton	Gamma tubulin complex component C-terminal	Gamma-tubulin complex component 3 OS=Arabidopsis thaliana OX=3702 GN=GCP3 PE=1 SV=1	Z	Cytoskeleton	gamma-tubulin complex component 3 [Glycine max]
Glyma.17G096700.Wm82.a2.v1	87.4836	42.3915	1.00313e-18	-1.00731	down	--	--	Cellular Component: nucleus (GO:0005634);; Molecular Function: sequence-specific DNA binding (GO:0043565);; Biological Process: positive regulation of transcription, DNA-templated (GO:0045893);;	K09338|9.9e-61|vvi:100241577|K09338 homeobox-leucine zipper protein | (RefSeq) homeobox-leucine zipper protein HAT5	--	[K]	Transcription	Homeodomain	Homeobox-leucine zipper protein HOX16 OS=Oryza sativa subsp. indica OX=39946 GN=HOX16 PE=2 SV=1	K	Transcription	homeobox-leucine zipper protein HAT5 [Glycine max]
Glyma.07G111500.Wm82.a2.v1	0.980958	0.378446	9.43435e-05	-1.31172	down	--	--	Cellular Component: integral component of membrane (GO:0016021);;	K09422|6.6e-07|rcu:8265812|K09422 transcription factor MYB, plant | (RefSeq) transcription factor DUO1	--	--	--	Plant protein of unknown function	UPF0481 protein At3g47200 OS=Arabidopsis thaliana OX=3702 GN=At3g47200 PE=2 SV=1	S	Function unknown	UPF0481 protein At3g47200 [Glycine max]
Glyma.13G113200.Wm82.a2.v1	34.9366	68.3452	1.72088e-13	1.00475	up	[O]	Posttranslational modification, protein turnover, chaperones	Molecular Function: peroxidase activity (GO:0004601);; Molecular Function: peroxiredoxin activity (GO:0051920);;	K03564|6.1e-120|gmx:100306216|K03564 thioredoxin-dependent peroxiredoxin [EC:1.11.1.24] | (RefSeq) thioredoxin superfamily protein	--	[O]	Posttranslational modification, protein turnover, chaperones	AhpC/TSA family	Peroxiredoxin Q, chloroplastic OS=Populus jackii OX=640484 GN=PRXQ PE=1 SV=1	O	Posttranslational modification, protein turnover, chaperones	thioredoxin superfamily protein [Glycine max]
Glyma.19G038400.Wm82.a2.v1	2.14449	7.26446	4.58843e-19	1.7914	up	[G]	Carbohydrate transport and metabolism	Molecular Function: phosphogluconate dehydrogenase (decarboxylating) activity (GO:0004616);; Cellular Component: cytosol (GO:0005829);; Biological Process: pentose-phosphate shunt, oxidative branch (GO:0009051);; Biological Process: D-gluconate catabolic process (GO:0046177);; Molecular Function: NADP binding (GO:0050661);;	K00033|4.4e-284|gmx:100799034|K00033 6-phosphogluconate dehydrogenase [EC:1.1.1.44 1.1.1.343] | (RefSeq) 6-phosphogluconate dehydrogenase, decarboxylating 3 isoform X2	Pentose phosphate pathway (ko00030);; Glutathione metabolism (ko00480);; Carbon metabolism (ko01200)	[G]	Carbohydrate transport and metabolism	6-phosphogluconate dehydrogenase, C-terminal domain	6-phosphogluconate dehydrogenase, decarboxylating 2 OS=Arabidopsis thaliana OX=3702 GN=PGD2 PE=1 SV=1	G	Carbohydrate transport and metabolism	6-phosphogluconate dehydrogenase, decarboxylating 3 isoform X1 [Glycine max]
Glyma.15G041100.Wm82.a2.v1	36.137	9.56576	3.52181e-36	-1.87052	down	--	--	Cellular Component: nucleus (GO:0005634);; Biological Process: regulation of transcription, DNA-templated (GO:0006355);; Molecular Function: sequence-specific DNA binding (GO:0043565);;	K09422|4.0e-110|ccaj:109806485|K09422 transcription factor MYB, plant | (RefSeq) transcription factor MYB48-like	--	[K]	Transcription	Myb-like DNA-binding domain	Transcription factor MYB48 OS=Arabidopsis thaliana OX=3702 GN=MYB48 PE=2 SV=1	--	--	transcription factor MYB59-like [Glycine soja]
Glyma.19G032900.Wm82.a2.v1	1.08214	0.396883	2.91311e-06	-1.38322	down	[G]	Carbohydrate transport and metabolism	Biological Process: lipid metabolic process (GO:0006629);; Molecular Function: phosphoric diester hydrolase activity (GO:0008081);;	--	--	--	--	--	PI-PLC X domain-containing protein At5g67130 OS=Arabidopsis thaliana OX=3702 GN=At5g67130 PE=1 SV=1	S	Function unknown	PI-PLC X domain-containing protein At5g67130 [Glycine max]
Glyma.15G150300.Wm82.a2.v1	0.149034	0.811308	1.55398e-10	2.4051	up	[V]	Defense mechanisms	Molecular Function: antiporter activity (GO:0015297);; Cellular Component: membrane (GO:0016020);; Cellular Component: integral component of membrane (GO:0016021);; Molecular Function: transmembrane transporter activity (GO:0022857);; Molecular Function: xenobiotic transporter activity (GO:0042910);;	K03327|2.7e-291|gmx:100785533|K03327 multidrug resistance protein, MATE family | (RefSeq) protein DETOXIFICATION 55	--	[R]	General function prediction only	MatE	Protein DETOXIFICATION 55 OS=Arabidopsis thaliana OX=3702 GN=DTX55 PE=2 SV=1	V	Defense mechanisms	protein DETOXIFICATION 55 [Glycine max]
Glyma.07G152000.Wm82.a2.v1	1.64098	4.18898	2.15091e-09	1.38842	up	--	--	Cellular Component: Golgi apparatus (GO:0005794);; Cellular Component: integral component of membrane (GO:0016021);; Molecular Function: O-acetyltransferase activity (GO:0016413);;	K23877|6.9e-38|ccaj:109800393|K23877 xyloglucan O-acetyltransferase | (RefSeq) protein ALTERED XYLOGLUCAN 4-like	--	--	--	GDSL/SGNH-like Acyl-Esterase family found in Pmr5 and Cas1p	Protein trichome birefringence-like 3 OS=Arabidopsis thaliana OX=3702 GN=TBL3 PE=2 SV=1	S	Function unknown	protein trichome birefringence-like 3 isoform X2 [Glycine max]
Glyma.07G226400.Wm82.a2.v1	4.97226	10.7778	1.69757e-11	1.14719	up	[ET]	Amino acid transport and metabolism;; Signal transduction mechanisms	Cellular Component: plasma membrane (GO:0005886);; Molecular Function: ligand-gated ion channel activity (GO:0015276);; Cellular Component: integral component of membrane (GO:0016021);; Molecular Function: signaling receptor activity (GO:0038023);;	K05387|0.0e+00|gmx:100799966|K05387 glutamate receptor, ionotropic, plant | (RefSeq) glutamate receptor 2.8	--	[PET]	Inorganic ion transport and metabolism;; Amino acid transport and metabolism;; Signal transduction mechanisms	Receptor family ligand binding region	Glutamate receptor 2.8 OS=Arabidopsis thaliana OX=3702 GN=GLR2.8 PE=2 SV=2	P	Inorganic ion transport and metabolism	hypothetical protein GLYMA_07G226400 [Glycine max]
Glyma.07G031700.Wm82.a2.v1	4.83478	1.64816	1.23433e-05	-1.50084	down	[Q]	Secondary metabolites biosynthesis, transport and catabolism	--	K08234|2.0e-12|peq:110020254|K08234 glyoxylase I family protein | (RefSeq) uncharacterized protein LOC110020254	--	--	--	Glyoxalase/Bleomycin resistance protein/Dioxygenase superfamily	--	S	Function unknown	putative lactoylglutathione lyase [Glycine max]
Glyma.14G095400.Wm82.a2.v1	1.43934	3.09132	6.50687e-07	1.12678	up	[I]	Lipid transport and metabolism	Biological Process: lipid metabolic process (GO:0006629);; Cellular Component: integral component of membrane (GO:0016021);; Molecular Function: oxidoreductase activity (GO:0016491);;	K21737|3.8e-273|gmx:100775880|K21737 acyl-lipid Delta6-acetylenase / acyl-lipid (9-3)-desaturase [EC:1.14.19.38 1.14.19.47] | (RefSeq) SLD1.4; acyl-lipid (9-3)-desaturase	--	[I]	Lipid transport and metabolism	Fatty acid desaturase	Acyl-lipid (9-3)-desaturase OS=Borago officinalis OX=13363 PE=1 SV=1	I	Lipid transport and metabolism	acyl-lipid (9-3)-desaturase [Glycine max]
Glyma.07G243200.Wm82.a2.v1	0.795352	1.63964	1.27252e-05	1.07955	up	--	--	Biological Process: cellulose microfibril organization (GO:0010215);; Cellular Component: anchored component of membrane (GO:0031225);;	K10956|1.6e-22|obr:102718200|K10956 protein transport protein SEC61 subunit alpha | (RefSeq) preprotein translocase subunit SECY, chloroplastic	Protein export (ko03060);; Protein processing in endoplasmic reticulum (ko04141);; Phagosome (ko04145)	--	--	COBRA-like protein	COBRA-like protein 7 OS=Arabidopsis thaliana OX=3702 GN=COBL7 PE=2 SV=2	S	Function unknown	COBRA-like protein 7 [Glycine max]
Glyma.19G262400.Wm82.a2.v1	5.58875	1.17754	9.06799e-12	-2.20939	down	--	--	--	--	--	--	--	--	--	--	--	uncharacterized protein LOC100305853 [Glycine max]
Glyma.03G202600.Wm82.a2.v1	6.78642	3.15089	0.0479305	-1.04888	down	[L]	Replication, recombination and repair	Molecular Function: ubiquitin-protein transferase activity (GO:0004842);; Molecular Function: ligase activity (GO:0016874);;	K10260|4.4e-13|cre:CHLREDRAFT_205525|K10260 F-box and WD-40 domain protein 7 | (RefSeq) predicted protein	Ubiquitin mediated proteolysis (ko04120)	--	--	U-box domain	E3 ubiquitin-protein ligase PUB22 OS=Arabidopsis thaliana OX=3702 GN=PUB22 PE=1 SV=1	H	Coenzyme transport and metabolism	E3 ubiquitin-protein ligase PUB22 [Glycine max]
Glyma.01G228700.Wm82.a2.v1	42.6182	93.4479	1.20118e-06	1.16382	up	[Q]	Secondary metabolites biosynthesis, transport and catabolism	Biological Process: biosynthetic process (GO:0009058);; Molecular Function: naringenin-chalcone synthase activity (GO:0016210);;	K00660|5.2e-226|gmx:100782897|K00660 chalcone synthase [EC:2.3.1.74] | (RefSeq) CHS7; chalcone synthase 7	Flavonoid biosynthesis (ko00941);; Circadian rhythm - plant (ko04712)	--	--	Chalcone and stilbene synthases, N-terminal domain	Chalcone synthase 7 OS=Glycine max OX=3847 GN=CHS7 PE=3 SV=1	H	Coenzyme transport and metabolism	chalcone synthase 7 [Glycine max]
Glyma.11G036900.Wm82.a2.v1	9.26599	3.75302	5.57312e-06	-1.25502	down	[I]	Lipid transport and metabolism	Molecular Function: phospholipase activity (GO:0004620);; Biological Process: lipid metabolic process (GO:0006629);;	K16818|1.5e-90|aly:9316206|K16818 phospholipase A1 [EC:3.1.1.32] | (RefSeq) phospholipase A(1) DAD1, chloroplastic	Glycerophospholipid metabolism (ko00564);; alpha-Linolenic acid metabolism (ko00592)	[I]	Lipid transport and metabolism	Lipase (class 3)	Phospholipase A1-Ibeta2, chloroplastic OS=Arabidopsis thaliana OX=3702 GN=At4g16820 PE=1 SV=2	I	Lipid transport and metabolism	phospholipase A1-Ibeta2, chloroplastic [Glycine max]
Glyma.20G224300.Wm82.a2.v1	1.79988	0.518075	0.000136463	-1.63451	down	--	--	Biological Process: microtubule cytoskeleton organization (GO:0000226);; Molecular Function: calcium ion binding (GO:0005509);; Biological Process: calcium-mediated signaling (GO:0019722);; Molecular Function: enzyme regulator activity (GO:0030234);;	K02183|4.8e-55|pvu:PHAVU_007G187200g|K02183 calmodulin | (RefSeq) hypothetical protein	MAPK signaling pathway - plant (ko04016);; Phosphatidylinositol signaling system (ko04070);; Plant-pathogen interaction (ko04626)	[T]	Signal transduction mechanisms	EF hand	Calmodulin OS=Triticum aestivum OX=4565 PE=1 SV=3	--	--	calmodulin-like protein 8 [Glycine max]
Glyma.13G257100.Wm82.a2.v1	0.287416	0.620841	0.000397068	1.14644	up	--	--	--	--	--	[O]	Posttranslational modification, protein turnover, chaperones	DnaJ domain	--	O	Posttranslational modification, protein turnover, chaperones	uncharacterized protein LOC100818960 [Glycine max]
Glyma.04G103900.Wm82.a2.v1	171.769	83.4956	5.27322e-13	-1.00111	down	--	--	Molecular Function: transcription factor activity, sequence-specific DNA binding (GO:0003700);; Cellular Component: nucleus (GO:0005634);; Molecular Function: sequence-specific DNA binding (GO:0043565);;	K09286|1.2e-167|gmx:732559|K09286 EREBP-like factor | (RefSeq) DREB3; dehydration responsive element-binding protein 3	--	--	--	AP2 domain	Ethylene-responsive transcription factor RAP2-4 OS=Arabidopsis thaliana OX=3702 GN=RAP2-4 PE=1 SV=1	K	Transcription	dehydration responsive element-binding protein 3 [Glycine max]
Glyma.07G003800.Wm82.a2.v1	0.318755	1.38026	1.75132e-11	2.15535	up	[N]	Cell motility	Cellular Component: Golgi apparatus (GO:0005794);; Cellular Component: integral component of membrane (GO:0016021);; Molecular Function: transferase activity, transferring glycosyl groups (GO:0016757);;	K20887|4.3e-276|tcc:18600709|K20887 xyloglucan glycosyltransferase 4 [EC:2.4.1.-] | (RefSeq) xyloglucan glycosyltransferase 4	--	--	--	Glycosyl transferase family group 2	Probable xyloglucan glycosyltransferase 5 OS=Arabidopsis thaliana OX=3702 GN=CSLC5 PE=1 SV=1	M	Cell wall/membrane/envelope biogenesis	probable xyloglucan glycosyltransferase 5 [Glycine max]
Glycine_max_newGene_3877	0.976103	2.77203	8.70924e-05	1.50147	up	--	--	--	--	--	--	--	--	--	--	--	hypothetical protein GLYMA_15G272200 [Glycine max]
Glyma.10G028300.Wm82.a2.v1	1.09952	3.69353	4.14544e-09	1.74668	up	--	--	Molecular Function: nutrient reservoir activity (GO:0045735);;	--	--	--	--	Cupin	Sucrose-binding protein OS=Glycine max OX=3847 GN=SBP PE=1 SV=1	S	Function unknown	Sucrose-binding protein isoform A [Glycine soja]
Glyma.11G109100.Wm82.a2.v1	38.5743	16.4761	1.15617e-23	-1.18752	down	--	--	--	--	--	--	--	PLATZ transcription factor	--	S	Function unknown	uncharacterized protein LOC100810888 [Glycine max]
Glyma.06G112200.Wm82.a2.v1	6.47204	0.539196	3.37204e-24	-3.54197	down	--	--	Cellular Component: plasma membrane (GO:0005886);; Cellular Component: integral component of membrane (GO:0016021);; Molecular Function: transmembrane transporter activity (GO:0022857);;	K17500|1.2e-55|nto:104085001|K17500 integrin-linked kinase-associated serine/threonine phosphatase 2C [EC:3.1.3.16] | (RefSeq) WAT1-related protein At3g18200 isoform X1	--	--	--	EamA-like transporter family	WAT1-related protein At4g08300 OS=Arabidopsis thaliana OX=3702 GN=At4g08300 PE=2 SV=1	S	Function unknown	WAT1-related protein At4g08300 [Glycine max]
Glyma.04G198400.Wm82.a2.v1	0.211056	0.867887	6.27446e-07	2.05418	up	--	--	Cellular Component: plasma membrane (GO:0005886);; Biological Process: carbohydrate transport (GO:0008643);; Cellular Component: integral component of membrane (GO:0016021);; Molecular Function: sugar transmembrane transporter activity (GO:0051119);;	K15382|7.1e-139|gmx:100790580|K15382 solute carrier family 50 (sugar transporter) | (RefSeq) GMSWEET4; sugar efflux transporter SWEET4	--	[R]	General function prediction only	Sugar efflux transporter for intercellular exchange	Bidirectional sugar transporter SWEET14 OS=Oryza sativa subsp. indica OX=39946 GN=SWEET14 PE=2 SV=1	U	Intracellular trafficking, secretion, and vesicular transport	sugar efflux transporter SWEET4 [Glycine max]
Glyma.03G203000.Wm82.a2.v1	5.00365	2.13735	8.26427e-10	-1.17927	down	--	--	Molecular Function: transcription factor activity, sequence-specific DNA binding (GO:0003700);;	K08064|8.0e-188|gmx:100527677|K08064 nuclear transcription factor Y, alpha | (RefSeq) GMNF-YA03; nuclear transcription factor Y subunit A-3	--	[K]	Transcription	CCAAT-binding transcription factor (CBF-B/NF-YA) subunit B	Nuclear transcription factor Y subunit A-10 OS=Arabidopsis thaliana OX=3702 GN=NFYA10 PE=2 SV=2	K	Transcription	nuclear transcription factor Y subunit A-3 [Glycine max]
Glycine_max_newGene_5947	0.930018	2.05297	0.000186044	1.18368	up	--	--	--	--	--	--	--	--	--	E	Amino acid transport and metabolism	--
Glyma.19G015300.Wm82.a2.v1	0.769793	0.337781	0.00482409	-1.13791	down	[QV]	Secondary metabolites biosynthesis, transport and catabolism;; Defense mechanisms	Molecular Function: iron ion binding (GO:0005506);; Cellular Component: membrane (GO:0016020);; Cellular Component: integral component of membrane (GO:0016021);; Molecular Function: oxidoreductase activity, acting on paired donors, with incorporation or reduction of molecular oxygen, NAD(P)H as one donor, and incorporation of one atom of oxygen (GO:0016709);; Molecular Function: heme binding (GO:…	K23136|2.9e-163|gra:105769156|K23136 fraxetin 5-hydroxylase [EC:1.14.14.164] | (RefSeq) uncharacterized LOC105769156	--	[Q]	Secondary metabolites biosynthesis, transport and catabolism	Cytochrome P450	Cytochrome P450 82A4 OS=Glycine max OX=3847 GN=CYP82A4 PE=2 SV=1	Q	Secondary metabolites biosynthesis, transport and catabolism	cytochrome P450 82A4-like [Glycine max]
Glyma.07G126600.Wm82.a2.v1	0.164928	1.6139	2.71236e-13	3.30323	up	--	--	Molecular Function: iron ion binding (GO:0005506);; Cellular Component: cytoplasm (GO:0005737);; Biological Process: inositol catabolic process (GO:0019310);; Molecular Function: inositol oxygenase activity (GO:0050113);;	K00469|5.0e-187|gmx:100777649|K00469 inositol oxygenase [EC:1.13.99.1] | (RefSeq) inositol oxygenase 2 isoform X1	Ascorbate and aldarate metabolism (ko00053);; Inositol phosphate metabolism (ko00562)	[R]	General function prediction only	Myo-inositol oxygenase	Inositol oxygenase 2 OS=Arabidopsis thaliana OX=3702 GN=MIOX2 PE=2 SV=2	S	Function unknown	inositol oxygenase 2 isoform X1 [Glycine max]
Glyma.09G080100.Wm82.a2.v1	1.94697	0.277814	1.7053e-17	-2.58311	down	[J]	Translation, ribosomal structure and biogenesis	Biological Process: purine nucleoside catabolic process (GO:0006152);; Molecular Function: zinc ion binding (GO:0008270);; Molecular Function: guanosine deaminase activity (GO:0047974);;	K12951|8.0e-68|smo:SELMODRAFT_448085|K12951 cobalt/nickel-transporting P-type ATPase D [EC:7.2.2.-] | (RefSeq) hypothetical protein	--	[F]	Nucleotide transport and metabolism	Cytidine and deoxycytidylate deaminase zinc-binding region	Guanosine deaminase OS=Arabidopsis thaliana OX=3702 GN=GSDA PE=1 SV=1	F	Nucleotide transport and metabolism	nucleoside deaminase superfamily protein [Glycine max]
Glyma.04G239000.Wm82.a2.v1	0.435072	0.88067	0.000619853	1.04245	up	--		Molecular Function: protein kinase activity (GO:0004672);; Molecular Function: ATP binding (GO:0005524);; Cellular Component: integral component of membrane (GO:0016021);;	K20359|1.1e-44|eus:EUTSA_v10006389mg|K20359 PRA1 family protein 1 | (RefSeq) hypothetical protein	--	--	--	Protein tyrosine and serine/threonine kinase	Probable inactive receptor kinase At4g23740 OS=Arabidopsis thaliana OX=3702 GN=At4g23740 PE=1 SV=1	T	Signal transduction mechanisms	probable inactive receptor kinase At4g23740 [Glycine max]
Glyma.13G098600.Wm82.a2.v1	10.0143	3.89767	1.05188e-28	-1.32225	down	--	--	Cellular Component: cytoplasm (GO:0005737);; Biological Process: actin polymerization or depolymerization (GO:0008154);; Cellular Component: actin cytoskeleton (GO:0015629);; Biological Process: actin filament severing (GO:0051014);; Molecular Function: actin filament binding (GO:0051015);;	K05768|0.0e+00|cpep:111785129|K05768 gelsolin | (RefSeq) villin-4-like isoform X1	--	[Z]	Cytoskeleton	Gelsolin repeat	Villin-4 OS=Arabidopsis thaliana OX=3702 GN=VLN4 PE=1 SV=1	Z	Cytoskeleton	villin-4 [Glycine max]
Glyma.16G134800.Wm82.a2.v1	0.551914	1.97217	4.06306e-08	1.85619	up	--	--	Cellular Component: integral component of membrane (GO:0016021);;	--	--	--	--	--	--	--	--	uncharacterized protein LOC102669125 [Glycine max]
Glyma.12G136600.Wm82.a2.v1	0.87577	2.34783	1.37036e-06	1.47123	up	--	--	Molecular Function: microtubule motor activity (GO:0003777);; Molecular Function: ATP binding (GO:0005524);; Cellular Component: kinesin complex (GO:0005871);; Cellular Component: microtubule (GO:0005874);; Biological Process: microtubule-based movement (GO:0007018);; Molecular Function: microtubule binding (GO:0008017);; Molecular Function: ATPase activity (GO:0016887);; Biological Process: spin…	K10405|0.0e+00|gmx:100784221|K10405 kinesin family member C1 | (RefSeq) kinesin-like protein KIN-14N	--	[Z]	Cytoskeleton	Kinesin motor domain	Kinesin-like protein KIN-14N OS=Arabidopsis thaliana OX=3702 GN=KIN14N PE=1 SV=1	Z	Cytoskeleton	kinesin-like protein KIN-14N [Glycine max]
Glyma.20G009800.Wm82.a2.v1	1.57121	0.621378	4.29248e-05	-1.31541	down	--	--	Molecular Function: DNA binding (GO:0003677);; Cellular Component: nucleus (GO:0005634);;	K14491|6.1e-11|sly:101246797|K14491 two-component response regulator ARR-B family | (RefSeq) two-component response regulator ORR24-like	Plant hormone signal transduction (ko04075)	--	--	Myb-like DNA-binding domain	Myb family transcription factor EFM OS=Arabidopsis thaliana OX=3702 GN=EFM PE=1 SV=2	K	Transcription	myb family transcription factor EFM isoform X1 [Glycine max]
Glyma.06G050100.Wm82.a2.v1	13.1896	0.799361	2.56582e-14	-4.04614	down	[EH]	Amino acid transport and metabolism;; Coenzyme transport and metabolism	Molecular Function: branched-chain-amino-acid transaminase activity (GO:0004084);; Biological Process: branched-chain amino acid biosynthetic process (GO:0009082);; Cellular Component: integral component of membrane (GO:0016021);; Molecular Function: L-leucine transaminase activity (GO:0052654);; Molecular Function: L-valine transaminase activity (GO:0052655);; Molecular Function: L-isoleucine tr…	K00826|2.3e-225|gmx:100782644|K00826 branched-chain amino acid aminotransferase [EC:2.6.1.42] | (RefSeq) uncharacterized protein LOC100782644	Cysteine and methionine metabolism (ko00270);; Valine, leucine and isoleucine degradation (ko00280);; Valine, leucine and isoleucine biosynthesis (ko00290);; Pantothenate and CoA biosynthesis (ko00770);; Glucosinolate biosynthesis (ko00966);; 2-Oxocarboxylic acid metabolism (ko01210);; Biosynthesis of amino acids (ko01230)	[E]	Amino acid transport and metabolism	Amino-transferase class IV	Branched-chain-amino-acid aminotransferase 2, chloroplastic OS=Arabidopsis thaliana OX=3702 GN=BCAT2 PE=1 SV=1	E	Amino acid transport and metabolism	Branched-chain-amino-acid aminotransferase 2, chloroplastic [Glycine soja]
Glyma.01G133500.Wm82.a2.v1	1.52368	0.745626	0.0056886	-1.005	down	--	--	Molecular Function: protein dimerization activity (GO:0046983);;	K16189|1.1e-13|cam:101488979|K16189 phytochrome-interacting factor 4 | (RefSeq) transcription factor PIF4-like	Plant hormone signal transduction (ko04075)	--	--	Helix-loop-helix DNA-binding domain	Transcription factor UNE10 OS=Arabidopsis thaliana OX=3702 GN=UNE10 PE=2 SV=1	K	Transcription	transcription factor UNE10 [Glycine max]
Glyma.03G217000.Wm82.a2.v1	0.355134	0.859497	2.06722e-05	1.30072	up	--	--	Molecular Function: microtubule motor activity (GO:0003777);; Molecular Function: ATP binding (GO:0005524);; Cellular Component: kinesin complex (GO:0005871);; Cellular Component: microtubule (GO:0005874);; Biological Process: microtubule-based movement (GO:0007018);; Molecular Function: microtubule binding (GO:0008017);; Molecular Function: ATPase activity (GO:0016887);;	K10406|0.0e+00|gmx:100795476|K10406 kinesin family member C2/C3 | (RefSeq) kinesin-like protein KIN-14I isoform X1	--	[Z]	Cytoskeleton	Kinesin motor domain	Kinesin-like protein KIN-14I OS=Arabidopsis thaliana OX=3702 GN=KIN14I PE=2 SV=1	Z	Cytoskeleton	kinesin-like protein KIN-14I isoform X1 [Glycine max]
Glyma.19G238500.Wm82.a2.v1	2.4229	1.14875	0.000155243	-1.03109	down	[G]	Carbohydrate transport and metabolism	Molecular Function: sugar:proton symporter activity (GO:0005351);; Cellular Component: integral component of plasma membrane (GO:0005887);; Biological Process: glucose import (GO:0046323);;	K03444|1.5e-191|gmx:100786465|K03444 MFS transporter, SP family, ERD6-like sugar transporter | (RefSeq) sugar transporter ERD6-like 5 isoform X1	--	[R]	General function prediction only	Sugar (and other) transporter	Sugar transporter ERD6-like 5 OS=Arabidopsis thaliana OX=3702 GN=At1g54730 PE=2 SV=2	U	Intracellular trafficking, secretion, and vesicular transport	hypothetical protein GLYMA_19G238500 [Glycine max]
Glyma.09G000400.Wm82.a2.v1	0.879708	0.357233	9.47942e-05	-1.2349	down	--	--	Molecular Function: zinc ion binding (GO:0008270);; Biological Process: RNA modification (GO:0009451);; Cellular Component: intracellular membrane-bounded organelle (GO:0043231);;	K22262|5.7e-132|qsu:112034235|K22262 WD repeat and FYVE domain-containing protein 3 | (RefSeq) protein SPIRRIG	--	[R]	General function prediction only	PPR repeat	Pentatricopeptide repeat-containing protein At4g13650 OS=Arabidopsis thaliana OX=3702 GN=PCMP-H42 PE=2 SV=2	S	Function unknown	pentatricopeptide repeat-containing protein At2g13600 isoform X1 [Glycine max]
Glycine_max_newGene_2595	1.03719	0.471815	0.00145177	-1.15672	down	--	--	--	K08681|5.7e-19|gmx:102667909|K08681 5'-phosphate synthase pdxT subunit [EC:4.3.3.6] | (RefSeq) probable pyridoxal 5'-phosphate synthase subunit pdx2	Vitamin B6 metabolism (ko00750)	--	--	--	--	T	Signal transduction mechanisms	hypothetical protein D0Y65_023710 [Glycine soja]
Glyma.19G221100.Wm82.a2.v1	0.167331	0.948319	2.77708e-10	2.51113	up	--	--	Molecular Function: N-acyltransferase activity (GO:0016410);;	K19861|3.9e-49|pvu:PHAVU_007G280800g|K19861 benzyl alcohol O-benzoyltransferase [EC:2.3.1.196 2.3.1.232] | (RefSeq) hypothetical protein	--	--	--	Transferase family	Acyl transferase 4 OS=Oryza sativa subsp. japonica OX=39947 GN=AT4 PE=1 SV=1	H	Coenzyme transport and metabolism	acyl transferase 4 [Glycine max]
Glyma.15G179800.Wm82.a2.v1	15.3351	5.77472	1.95452e-14	-1.36725	down	--	--	--	--	--	--	--	zinc-finger of the FCS-type, C2-C2	FCS-Like Zinc finger 14 OS=Arabidopsis thaliana OX=3702 GN=FLZ14 PE=1 SV=1	S	Function unknown	uncharacterized protein LOC100813156 [Glycine max]
Glyma.04G050100.Wm82.a2.v1	3.61312	10.1171	1.01939e-12	1.51532	up	--	--	Cellular Component: integral component of membrane (GO:0016021);;	--	--	--	--	--	--	--	--	hypothetical protein GLYMA_04G050100 [Glycine max]
Glyma.17G088800.Wm82.a2.v1	0.172406	0.48749	1.4252e-06	1.51354	up	--	--	Molecular Function: inorganic anion exchanger activity (GO:0005452);; Cellular Component: integral component of membrane (GO:0016021);;	K24194|0.0e+00|vra:106762308|K24194 boron transporter | (RefSeq) probable boron transporter 2	--	[P]	Inorganic ion transport and metabolism	HCO3- transporter family	Probable boron transporter 2 OS=Arabidopsis thaliana OX=3702 GN=BOR2 PE=2 SV=1	P	Inorganic ion transport and metabolism	hypothetical protein GLYMA_17G088800 [Glycine max]
Glyma.18G205500.Wm82.a2.v1	0.286821	0.628304	7.47422e-05	1.15521	up	--	--	Cellular Component: integral component of membrane (GO:0016021);;	K13466|1.6e-09|pper:18785913|K13466 EIX receptor 1/2 | (RefSeq) LRR receptor-like serine/threonine-protein kinase GSO2 isoform X1	Plant-pathogen interaction (ko04626)	[R]	General function prediction only	Leucine rich repeat	Receptor-like protein 6 OS=Arabidopsis thaliana OX=3702 GN=RLP6 PE=3 SV=1	S	Function unknown	hypothetical protein GLYMA_18G205500 [Glycine max]
Glyma.06G269500.Wm82.a2.v1	442.911	148.82	2.10526e-34	-1.53445	down	--	--	Molecular Function: translation initiation factor activity (GO:0003743);;	K03113|7.1e-59|gmx:100791863|K03113 translation initiation factor 1 | (RefSeq) protein translation factor SUI1 homolog 1	RNA transport (ko03013)	[J]	Translation, ribosomal structure and biogenesis	Translation initiation factor SUI1	Protein translation factor SUI1 homolog 1 OS=Arabidopsis thaliana OX=3702 GN=At4g27130 PE=1 SV=2	J	Translation, ribosomal structure and biogenesis	protein translation factor SUI1 homolog 1 [Glycine max]
Glyma.17G222300.Wm82.a2.v1	2.25242	6.10245	3.69949e-05	1.48483	up	--	--	Molecular Function: transcription factor activity, sequence-specific DNA binding (GO:0003700);; Cellular Component: nucleus (GO:0005634);; Molecular Function: sequence-specific DNA binding (GO:0043565);;	K18835|3.3e-13|sly:101256276|K18835 WRKY transcription factor 2 | (RefSeq) probable WRKY transcription factor 3	Plant-pathogen interaction (ko04626)	--	--	WRKY DNA -binding domain	Probable WRKY transcription factor 40 OS=Arabidopsis thaliana OX=3702 GN=WRKY40 PE=1 SV=1	K	Transcription	WRKY transcription factor 30 isoform X1 [Glycine max]
Glyma.17G239500.Wm82.a2.v1	0.562277	1.16159	4.55498e-06	1.07696	up	--	--	Molecular Function: microtubule motor activity (GO:0003777);; Molecular Function: ATP binding (GO:0005524);; Cellular Component: kinesin complex (GO:0005871);; Cellular Component: microtubule (GO:0005874);; Biological Process: microtubule-based movement (GO:0007018);; Biological Process: mitotic spindle organization (GO:0007052);; Molecular Function: microtubule binding (GO:0008017);; Molecular F…	K18806|8.1e-85|mis:MICPUN_63076|K18806 kinesin family member 7 | (RefSeq) predicted protein	--	[Z]	Cytoskeleton	Kinesin motor domain	Kinesin-like protein KIN-4A OS=Gossypium hirsutum OX=3635 GN=KIN4A PE=2 SV=1	Z	Cytoskeleton	kinesin-like protein KIN-4A isoform X1 [Glycine max]
Glyma.07G088300.Wm82.a2.v1	5.47312	12.6559	2.80534e-07	1.23504	up	--	--	Molecular Function: protein binding (GO:0005515);;	--	--	--	--	Leucine rich repeat	Leucine-rich repeat extensin-like protein 4 OS=Arabidopsis thaliana OX=3702 GN=LRX4 PE=1 SV=1	S	Function unknown	hypothetical protein GLYMA_07G088300 [Glycine max]
Glyma.07G129900.Wm82.a2.v1	1.16044	2.56273	0.00170403	1.14581	up	--	--	Molecular Function: phospholipase A2 activity (GO:0004623);; Molecular Function: calcium ion binding (GO:0005509);; Cellular Component: extracellular region (GO:0005576);; Biological Process: phospholipid metabolic process (GO:0006644);; Molecular Function: lipid binding (GO:0008289);; Biological Process: lipid catabolic process (GO:0016042);; Biological Process: arachidonic acid secretion (GO:00…	K01047|1.8e-89|gmx:100500260|K01047 secretory phospholipase A2 [EC:3.1.1.4] | (RefSeq) uncharacterized protein LOC100500260 precursor	Glycerophospholipid metabolism (ko00564);; Ether lipid metabolism (ko00565);; Arachidonic acid metabolism (ko00590);; Linoleic acid metabolism (ko00591);; alpha-Linolenic acid metabolism (ko00592)	--	--	--	Phospholipase A2-alpha OS=Arabidopsis thaliana OX=3702 GN=PLA2-ALPHA PE=1 SV=1	T	Signal transduction mechanisms	uncharacterized protein LOC100500260 precursor [Glycine max]
Glyma.19G005700.Wm82.a2.v1	1.84889	4.84516	3.89698e-12	1.42269	up	[M]	Cell wall/membrane/envelope biogenesis	Molecular Function: protein kinase activity (GO:0004672);; Molecular Function: ATP binding (GO:0005524);; Cellular Component: integral component of membrane (GO:0016021);;	K24104|2.6e-60|thj:104799061|K24104 GPN-loop GTPase | (RefSeq) LOW QUALITY PROTEIN: uncharacterized protein LOC104799061	--	--	--	Protein tyrosine and serine/threonine kinase	Cysteine-rich receptor-like protein kinase 42 OS=Arabidopsis thaliana OX=3702 GN=CRK42 PE=2 SV=1	T	Signal transduction mechanisms	cysteine-rich receptor-like protein kinase 42 [Glycine max]
Glyma.11G000900.Wm82.a2.v1	3.90595	10.3883	1.17761e-13	1.44098	up	--	--	Cellular Component: cellular_component (GO:0005575);; Cellular Component: membrane (GO:0016020);; Cellular Component: intrinsic component of membrane (GO:0031224);; Cellular Component: anchored component of membrane (GO:0031225);; Cellular Component: membrane part (GO:0044425);;	--	--	--	--	--	--	S	Function unknown	classical arabinogalactan protein 9 [Glycine max]
Glyma.12G180100.Wm82.a2.v1	2.23278	0.646125	6.97459e-09	-1.7379	down	--	--	--	--	--	--	--	--	--	--	--	hypothetical protein GLYMA_12G180100 [Glycine max]
Glyma.04G106500.Wm82.a2.v1	4.77251	2.30864	0.000689968	-1.00269	down	--	--	Biological Process: metal ion transport (GO:0030001);; Molecular Function: metal ion binding (GO:0046872);;	K10752|1.1e-30|zju:107427343|K10752 histone-binding protein RBBP4 | (RefSeq) LOW QUALITY PROTEIN: WD-40 repeat-containing protein MSI3	--	[P]	Inorganic ion transport and metabolism	Heavy-metal-associated domain	Heavy metal-associated isoprenylated plant protein 24 OS=Arabidopsis thaliana OX=3702 GN=HIPP24 PE=1 SV=1	P	Inorganic ion transport and metabolism	heavy metal-associated isoprenylated plant protein 24 [Glycine max]
Glyma.18G014900.Wm82.a2.v1	303.476	140.907	3.67758e-21	-1.06939	down	--	--	Cellular Component: nucleus (GO:0005634);; Molecular Function: sequence-specific DNA binding (GO:0043565);; Biological Process: positive regulation of transcription, DNA-templated (GO:0045893);;	K09338|3.6e-164|gmx:100777924|K09338 homeobox-leucine zipper protein | (RefSeq) homeobox-leucine zipper protein ATHB-6	--	[K]	Transcription	Homeobox associated leucine zipper	Homeobox-leucine zipper protein ATHB-6 OS=Arabidopsis thaliana OX=3702 GN=ATHB-6 PE=1 SV=1	K	Transcription	homeobox-leucine zipper protein ATHB-6 [Glycine max]
Glyma.10G013900.Wm82.a2.v1	0.164393	0.964396	9.23656e-07	2.57335	up	[G]	Carbohydrate transport and metabolism	Molecular Function: hydrolase activity, hydrolyzing O-glycosyl compounds (GO:0004553);; Molecular Function: xylan 1,4-beta-xylosidase activity (GO:0009044);; Cellular Component: plant-type cell wall (GO:0009505);; Biological Process: arabinan catabolic process (GO:0031222);; Biological Process: xylan catabolic process (GO:0045493);; Molecular Function: alpha-L-arabinofuranosidase activity (GO:004…	K15920|8.3e-268|pavi:110767071|K15920 xylan 1,4-beta-xylosidase [EC:3.2.1.37] | (RefSeq) beta-xylosidase/alpha-L-arabinofuranosidase 2-like	Amino sugar and nucleotide sugar metabolism (ko00520)	--	--	Glycosyl hydrolase family 3 C-terminal domain	Probable beta-D-xylosidase 2 OS=Arabidopsis thaliana OX=3702 GN=BXL2 PE=2 SV=1	G	Carbohydrate transport and metabolism	probable beta-D-xylosidase 2 [Glycine max]
Glyma.14G070200.Wm82.a2.v1	1.00201	2.07105	0.0107452	1.04441	up	[S]	Function unknown	--	--	--	--	--	Protein of unknown function (DUF1499)	--	S	Function unknown	uncharacterized protein LOC102664495 isoform X2 [Glycine max]
Glyma.02G015500.Wm82.a2.v1	0.42946	0.90421	0.000250734	1.08812	up	--	--	Molecular Function: microtubule motor activity (GO:0003777);; Molecular Function: ATP binding (GO:0005524);; Cellular Component: kinesin complex (GO:0005871);; Cellular Component: microtubule (GO:0005874);; Biological Process: microtubule-based movement (GO:0007018);; Molecular Function: microtubule binding (GO:0008017);; Molecular Function: ATPase activity (GO:0016887);;	K10406|0.0e+00|gmx:100801279|K10406 kinesin family member C2/C3 | (RefSeq) kinesin-like protein KIN-14I	--	[Z]	Cytoskeleton	Kinesin motor domain	Kinesin-like protein KIN-14I OS=Arabidopsis thaliana OX=3702 GN=KIN14I PE=2 SV=1	Z	Cytoskeleton	kinesin-like protein KIN-14I [Glycine max]
Glyma.06G276600.Wm82.a2.v1	2.83723	20.7164	0.0293188	2.94135	up	--	--	--	--	--	--	--	--	--	--	--	hypothetical protein GLYMA_06G276600 [Glycine max]
Glyma.16G183300.Wm82.a2.v1	3.26915	1.40529	0.00319699	-1.17346	down	--	--	Cellular Component: integral component of membrane (GO:0016021);;	K13466|2.2e-48|cic:CICLE_v10017769mg|K13466 EIX receptor 1/2 | (RefSeq) hypothetical protein	Plant-pathogen interaction (ko04626)	[R]	General function prediction only	Leucine rich repeat	Receptor-like protein EIX2 OS=Solanum lycopersicum OX=4081 GN=EIX2 PE=1 SV=2	S	Function unknown	hypothetical protein GLYMA_16G183300 [Glycine max]
Glyma.16G180300.Wm82.a2.v1	0.385899	1.51977	4.57738e-06	1.95327	up	--	--	--	K19747|4.8e-39|vvi:100243942|K19747 BAHD acyltransferase [EC:2.3.1.-] | (RefSeq) BAHD acyltransferase DCR	--	--	--	C2 domain	--	S	Function unknown	protein SRC2-like [Glycine max]
Glyma.06G213100.Wm82.a2.v1	0.423978	1.2301	5.61567e-07	1.55061	up	--	--	Molecular Function: transcription factor activity, sequence-specific DNA binding (GO:0003700);; Cellular Component: nucleus (GO:0005634);; Biological Process: regulation of transcription, DNA-templated (GO:0006355);; Biological Process: response to ethylene (GO:0009723);; Biological Process: response to abscisic acid (GO:0009737);; Biological Process: salicylic acid mediated signaling pathway (GO…	K14494|4.9e-293|gmx:100814551|K14494 DELLA protein | (RefSeq) DELLA protein SLR1	Plant hormone signal transduction (ko04075)	--	--	GRAS domain family	DELLA protein 2 OS=Medicago truncatula OX=3880 GN=DELLA2 PE=2 SV=1	K	Transcription	DELLA protein SLR1 [Glycine max]
Glyma.11G046400.Wm82.a2.v1	0.743642	1.47128	0.0490524	1.00705	up	--	--	--	--	--	--	--	VQ motif	VQ motif-containing protein 29 OS=Arabidopsis thaliana OX=3702 GN=VQ29 PE=1 SV=1	S	Function unknown	uncharacterized protein LOC100500571 [Glycine max]
Glyma.03G044200.Wm82.a2.v1	0.536759	0.255665	0.00559185	-1.03118	down	--	--	Molecular Function: hydrolase activity (GO:0016787);;	K19996|3.4e-98|atr:18449038|K19996 phosphatidylinositol transfer protein SFH5 | (RefSeq) patellin-3	--	[I]	Lipid transport and metabolism	CRAL/TRIO domain	Patellin-6 OS=Arabidopsis thaliana OX=3702 GN=PATL6 PE=2 SV=1	I	Lipid transport and metabolism	patellin-6 [Glycine max]
Glyma.10G137200.Wm82.a2.v1	5.12816	22.5284	2.45476e-10	2.13789	up	--	--	Molecular Function: DNA binding (GO:0003677);;	--	--	--	--	--	--	--	--	hypothetical protein GLYMA_10G137200 [Glycine max]
Glyma.17G116000.Wm82.a2.v1	0.975717	0.158422	4.53309e-08	-2.61993	down	--	--	Biological Process: microtubule-based process (GO:0007017);; Cellular Component: dynein complex (GO:0030286);; Molecular Function: dynein intermediate chain binding (GO:0045505);; Molecular Function: dynein light intermediate chain binding (GO:0051959);; Biological Process: positive regulation of ATP-dependent microtubule motor activity, plus-end-directed (GO:2000582);;	K10418|7.2e-125|gmx:100791759|K10418 dynein light chain LC8-type | (RefSeq) uncharacterized protein LOC100791759	--	[Z]	Cytoskeleton	Dynein light chain type 1	Dynein 8 kDa light chain, flagellar outer arm OS=Chlamydomonas reinhardtii OX=3055 PE=1 SV=1	Z	Cytoskeleton	uncharacterized protein LOC100791759 [Glycine max]
Glyma.06G033100.Wm82.a2.v1	0.218738	0.501681	0.00420377	1.21077	up	--	--	--	--	--	--	--	--	--	--	--	eukaryotic translation initiation factor 5B [Glycine max]
Glyma.19G240700.Wm82.a2.v1	3.42281	7.29289	3.47745e-16	1.13001	up	--	--	Cellular Component: nucleus (GO:0005634);; Biological Process: nuclear export (GO:0051168);;	K14289|0.0e+00|gmx:100789688|K14289 exportin-5 | (RefSeq) protein HASTY 1	RNA transport (ko03013)	[YU]	Nuclear structure;; Intracellular trafficking, secretion, and vesicular transport	Exportin 1-like protein	Protein HASTY 1 OS=Arabidopsis thaliana OX=3702 GN=HST1 PE=1 SV=1	--	--	protein HASTY 1 [Glycine max]
Glyma.10G250300.Wm82.a2.v1	8.92541	22.112	5.93968e-18	1.34282	up	[I]	Lipid transport and metabolism	Biological Process: catabolic process (GO:0009056);; Molecular Function: hydrolase activity (GO:0016787);;	K13258|4.5e-109|vra:106776973|K13258 2-hydroxyisoflavanone dehydratase [EC:4.2.1.105] | (RefSeq) 2-hydroxyisoflavanone dehydratase	Isoflavonoid biosynthesis (ko00943)	[V]	Defense mechanisms	alpha/beta hydrolase fold	2-hydroxyisoflavanone dehydratase OS=Glycyrrhiza echinata OX=46348 GN=HIDM PE=1 SV=1	V	Defense mechanisms	uncharacterized protein LOC114371837 [Glycine soja]
Glyma.05G232700.Wm82.a2.v1	0.189566	0.485501	0.000112976	1.35549	up	--	--	Biological Process: lipid metabolic process (GO:0006629);;	K01052|2.1e-20|qsu:111986821|K01052 lysosomal acid lipase/cholesteryl ester hydrolase [EC:3.1.1.13] | (RefSeq) triacylglycerol lipase 2-like	Steroid biosynthesis (ko00100)	[I]	Lipid transport and metabolism	Partial alpha/beta-hydrolase lipase region	Triacylglycerol lipase 2 OS=Arabidopsis thaliana OX=3702 GN=LIP2 PE=2 SV=1	I	Lipid transport and metabolism	lipase 3-like isoform X2 [Glycine max]
Glyma.08G241600.Wm82.a2.v1	41.8182	17.4302	2.80056e-17	-1.22228	down	--	--	Molecular Function: ion channel activity (GO:0005216);; Cellular Component: integral component of membrane (GO:0016021);;	K05391|0.0e+00|gmx:100810471|K05391 cyclic nucleotide gated channel, plant | (RefSeq) cyclic nucleotide-gated ion channel 2 isoform X1	Plant-pathogen interaction (ko04626)	[PT]	Inorganic ion transport and metabolism;; Signal transduction mechanisms	Ion transport protein	Cyclic nucleotide-gated ion channel 2 OS=Arabidopsis thaliana OX=3702 GN=CNGC2 PE=1 SV=1	--	--	cyclic nucleotide-gated ion channel 2 isoform X1 [Glycine max]
Glyma.11G073000.Wm82.a2.v1	9.68108	3.88119	3.69682e-10	-1.28519	down	[O]	Posttranslational modification, protein turnover, chaperones	Biological Process: cell redox homeostasis (GO:0045454);;	K03671|1.5e-62|gmx:100499701|K03671 thioredoxin 1 | (RefSeq) uncharacterized protein LOC100499701	--	[O]	Posttranslational modification, protein turnover, chaperones	Thioredoxin	Thioredoxin H-type OS=Ricinus communis OX=3988 PE=3 SV=1	O	Posttranslational modification, protein turnover, chaperones	uncharacterized protein LOC100499701 [Glycine max]
Glyma.06G078100.Wm82.a2.v1	14.3428	6.58594	2.28781e-13	-1.09782	down	[O]	Posttranslational modification, protein turnover, chaperones	Molecular Function: molecular_function (GO:0003674);; Molecular Function: catalytic activity (GO:0003824);; Molecular Function: thioredoxin-disulfide reductase activity (GO:0004791);; Cellular Component: cellular_component (GO:0005575);; Cellular Component: intracellular (GO:0005622);; Cellular Component: cell (GO:0005623);; Cellular Component: cytoplasm (GO:0005737);; Biological Process: biologi…	K17609|2.3e-234|gmx:100778160|K17609 nucleoredoxin [EC:1.8.1.8] | (RefSeq) probable nucleoredoxin 3	--	[R]	General function prediction only	Thioredoxin-like	Probable nucleoredoxin 3 OS=Arabidopsis thaliana OX=3702 GN=At4g31240 PE=2 SV=1	O	Posttranslational modification, protein turnover, chaperones	Putative nucleoredoxin 3 [Glycine soja]
Glyma.05G201300.Wm82.a2.v1	18.635	38.3115	3.59111e-11	1.02267	up	[IQ]	Lipid transport and metabolism;; Secondary metabolites biosynthesis, transport and catabolism	Biological Process: fatty acid biosynthetic process (GO:0006633);; Molecular Function: phosphopantetheine binding (GO:0031177);;	K03955|3.9e-06|jcu:105644898|K03955 NADH dehydrogenase (ubiquinone) 1 alpha/beta subcomplex 1, acyl-carrier protein | (RefSeq) ACP; acyl carrier protein 2, mitochondrial	Oxidative phosphorylation (ko00190)	[CIQ]	Energy production and conversion;; Lipid transport and metabolism;; Secondary metabolites biosynthesis, transport and catabolism	Phosphopantetheine attachment site	Acyl carrier protein 4, chloroplastic OS=Cuphea lanceolata OX=3930 GN=ACL1 PE=3 SV=1	--	--	acyl carrier protein 4, chloroplastic isoform X1 [Glycine max]
Glyma.08G342600.Wm82.a2.v1	0.107402	0.259847	0.000358253	1.29661	up	[V]	Defense mechanisms	Molecular Function: ATP binding (GO:0005524);; Cellular Component: integral component of membrane (GO:0016021);; Molecular Function: ATPase activity (GO:0016887);; Molecular Function: ATPase activity, coupled to transmembrane movement of substances (GO:0042626);; Biological Process: transmembrane transport (GO:0055085);;	K05658|0.0e+00|gmx:100809399|K05658 ATP-binding cassette, subfamily B (MDR/TAP), member 1 [EC:7.6.2.2] | (RefSeq) ABC transporter B family member 15	ABC transporters (ko02010)	[Q]	Secondary metabolites biosynthesis, transport and catabolism	ABC transporter transmembrane region	ABC transporter B family member 15 OS=Arabidopsis thaliana OX=3702 GN=ABCB15 PE=3 SV=1	Q	Secondary metabolites biosynthesis, transport and catabolism	ABC transporter B family member 15 [Glycine max]
Glyma.13G237000.Wm82.a2.v1	398.325	117.303	2.47147e-33	-1.74659	down	--	--	--	--	--	--	--	Dormancy/auxin associated protein	Dormancy-associated protein 1 OS=Pisum sativum OX=3888 GN=DRM1 PE=2 SV=1	S	Function unknown	dormancy-associated protein 1-like isoform 1 [Glycine max]
Glyma.18G044900.Wm82.a2.v1	3.33705	8.99013	1.1483e-26	1.45973	up	[IQ]	Lipid transport and metabolism;; Secondary metabolites biosynthesis, transport and catabolism	Molecular Function: catalytic activity (GO:0003824);;	K23618|0.0e+00|gmx:100819630|K23618 acyl-activating enzyme 11/12 [EC:6.2.1.2 6.2.1.-] | (RefSeq) butyrate--CoA ligase AAE11, peroxisomal	--	[I]	Lipid transport and metabolism	AMP-binding enzyme	Butyrate--CoA ligase AAE11, peroxisomal OS=Arabidopsis thaliana OX=3702 GN=AAE11 PE=1 SV=1	I	Lipid transport and metabolism	butyrate--CoA ligase AAE11, peroxisomal [Glycine max]
Glyma.07G115500.Wm82.a2.v1	0.775686	5.30754	5.47602e-22	2.81468	up	[R]	General function prediction only	Biological Process: lipid catabolic process (GO:0016042);; Molecular Function: hydrolase activity (GO:0016787);;	--	--	[I]	Lipid transport and metabolism	Patatin-like phospholipase	Patatin-like protein 1 OS=Arabidopsis thaliana OX=3702 GN=PLP1 PE=1 SV=2	--	--	patatin group A-3-like precursor [Glycine max]
Glyma.02G015800.Wm82.a2.v1	0.663903	1.73623	1.14688e-07	1.40886	up	[C]	Energy production and conversion	Molecular Function: fumarate hydratase activity (GO:0004333);; Cellular Component: mitochondrion (GO:0005739);; Biological Process: tricarboxylic acid cycle (GO:0006099);; Biological Process: fumarate metabolic process (GO:0006106);; Biological Process: malate metabolic process (GO:0006108);; Cellular Component: tricarboxylic acid cycle enzyme complex (GO:0045239);;	K01679|7.2e-267|gmx:100813552|K01679 fumarate hydratase, class II [EC:4.2.1.2] | (RefSeq) fumarate hydratase 1, mitochondrial	Citrate cycle (TCA cycle) (ko00020);; Pyruvate metabolism (ko00620);; Carbon metabolism (ko01200)	[C]	Energy production and conversion	Lyase	Fumarate hydratase 1, mitochondrial OS=Arabidopsis thaliana OX=3702 GN=FUM1 PE=1 SV=2	C	Energy production and conversion	fumarate hydratase 1, mitochondrial [Glycine max]
Glyma.12G092900.Wm82.a2.v1	113.34	42.0392	1.03181e-17	-1.39658	down	[IQR]	Lipid transport and metabolism;; Secondary metabolites biosynthesis, transport and catabolism;; General function prediction only	Molecular Function: oxidoreductase activity (GO:0016491);;	K09841|3.0e-71|nsy:104237462|K09841 xanthoxin dehydrogenase [EC:1.1.1.288] | (RefSeq) xanthoxin dehydrogenase-like	Carotenoid biosynthesis (ko00906)	[R]	General function prediction only	Enoyl-(Acyl carrier protein) reductase	Secoisolariciresinol dehydrogenase (Fragment) OS=Forsythia intermedia OX=55183 PE=1 SV=1	Q	Secondary metabolites biosynthesis, transport and catabolism	secoisolariciresinol dehydrogenase [Glycine max]
Glyma.06G284900.Wm82.a2.v1	0.635921	1.50653	0.00107103	1.26176	up	--	--	Molecular Function: DNA binding (GO:0003677);; Molecular Function: transcription factor activity, sequence-specific DNA binding (GO:0003700);; Cellular Component: nucleus (GO:0005634);; Biological Process: positive regulation of transcription, DNA-templated (GO:0045893);;	K04374|6.0e-37|mus:103997104|K04374 cyclic AMP-dependent transcription factor ATF-4 | (RefSeq) basic leucine zipper 61-like	Protein processing in endoplasmic reticulum (ko04141)	--	--	Basic region leucine zipper	Basic leucine zipper 61 OS=Arabidopsis thaliana OX=3702 GN=BZIP61 PE=1 SV=1	K	Transcription	bZIP transcription factor bZIP50 [Glycine max]
Glyma.05G085700.Wm82.a2.v1	1.98764	5.56365	8.25548e-14	1.52117	up	[R]	General function prediction only	Cellular Component: integral component of membrane (GO:0016021);; Biological Process: xylan biosynthetic process (GO:0045492);;	K18801|2.8e-44|atr:18427851|K18801 glucuronoxylan 4-O-methyltransferase [EC:2.1.1.112] | (RefSeq) glucuronoxylan 4-O-methyltransferase 1	--	--	--	Polysaccharide biosynthesis	Protein IRX15-LIKE OS=Arabidopsis thaliana OX=3702 GN=IRX15-L PE=2 SV=1	S	Function unknown	protein IRX15-LIKE [Glycine max]
Glyma.13G147300.Wm82.a2.v1	0.240579	0.625386	2.0001e-05	1.4004	up	--	--	--	--	--	--	--	N-terminal C2 in EEIG1 and EHBP1 proteins	--	--	--	myosin-11 isoform X1 [Glycine max]
Glyma.17G103200.Wm82.a2.v1	0.885009	2.086	0.000505485	1.25986	up	--	--	--	--	--	--	--	Protein of unknown function, DUF538	Uncharacterized protein At5g01610 OS=Arabidopsis thaliana OX=3702 GN=At5g01610 PE=1 SV=1	S	Function unknown	uncharacterized protein LOC100776470 [Glycine max]
Glyma.13G224000.Wm82.a2.v1	13.0597	28.5238	5.24479e-18	1.16554	up	[O]	Posttranslational modification, protein turnover, chaperones	--	K03283|2.1e-207|gmx:100788531|K03283 heat shock 70kDa protein 1/2/6/8 | (RefSeq) heat shock 70 kDa protein-like	Spliceosome (ko03040);; Protein processing in endoplasmic reticulum (ko04141);; Endocytosis (ko04144)	[O]	Posttranslational modification, protein turnover, chaperones	Hsp70 protein	Heat shock 70 kDa protein OS=Glycine max OX=3847 GN=HSP70 PE=3 SV=1	O	Posttranslational modification, protein turnover, chaperones	hypothetical protein GLYMA_13G224000 [Glycine max]
Glyma.11G139100.Wm82.a2.v1	2.53029	5.20103	7.77399e-05	1.04819	up	--	--	Cellular Component: extracellular region (GO:0005576);; Cellular Component: cell wall (GO:0005618);; Biological Process: plant-type cell wall organization (GO:0009664);; Cellular Component: membrane (GO:0016020);;	K20628|6.9e-102|sind:105166984|K20628 expansin | (RefSeq) expansin-A2	--	--	--	Expansin C-terminal domain	Expansin-A4 OS=Arabidopsis thaliana OX=3702 GN=EXPA4 PE=1 SV=1	S	Function unknown	expansin A5c precursor [Glycine max]
Glyma.06G313500.Wm82.a2.v1	1.65474	4.49546	7.97583e-15	1.46991	up	[G]	Carbohydrate transport and metabolism	Cellular Component: integral component of membrane (GO:0016021);; Molecular Function: transmembrane transporter activity (GO:0022857);;	K12818|1.2e-83|smo:SELMODRAFT_429199|K12818 ATP-dependent RNA helicase DHX8/PRP22 [EC:3.6.4.13] | (RefSeq) hypothetical protein	Spliceosome (ko03040)	[R]	General function prediction only	Major Facilitator Superfamily	Protein ZINC INDUCED FACILITATOR-LIKE 1 OS=Arabidopsis thaliana OX=3702 GN=ZIFL1 PE=2 SV=1	S	Function unknown	protein ZINC INDUCED FACILITATOR-LIKE 1 isoform X1 [Glycine max]
Glyma.19G066700.Wm82.a2.v1	0.635159	1.26738	0.00182962	1.01275	up	[P]	Inorganic ion transport and metabolism	Biological Process: cation transport (GO:0006812);; Molecular Function: cation transmembrane transporter activity (GO:0008324);; Cellular Component: membrane (GO:0016020);; Cellular Component: integral component of membrane (GO:0016021);;	K13754|5.4e-295|gmx:100818583|K13754 solute carrier family 24 (sodium/potassium/calcium exchanger), member 6 | (RefSeq) cation/calcium exchanger 1	--	[P]	Inorganic ion transport and metabolism	Sodium/calcium exchanger protein	Cation/calcium exchanger 1 OS=Arabidopsis thaliana OX=3702 GN=CCX1 PE=2 SV=1	P	Inorganic ion transport and metabolism	cation/calcium exchanger 1 [Glycine max]
Glyma.05G188700.Wm82.a2.v1	0.571151	1.18995	0.000890213	1.06347	up	--	--	Cellular Component: nucleosome (GO:0000786);; Molecular Function: DNA binding (GO:0003677);; Cellular Component: nucleus (GO:0005634);; Molecular Function: protein heterodimerization activity (GO:0046982);;	K11253|1.4e-66|adu:107461485|K11253 histone H3 | (RefSeq) histone H3.2	--	[B]	Chromatin structure and dynamics	Core histone H2A/H2B/H3/H4	Histone H3.2 OS=Medicago sativa OX=3879 GN=H3-1.1 PE=1 SV=2	B	Chromatin structure and dynamics	uncharacterized protein LOC111021800 [Momordica charantia]
Glyma.11G029400.Wm82.a2.v1	0.391699	0.762717	0.000568556	1.00173	up	--	--	--	K22911|4.6e-34|psom:113299743|K22911 thiamine phosphate phosphatase / amino-HMP aminohydrolase [EC:3.1.3.100 3.5.99.-] | (RefSeq) bifunctional TH2 protein, mitochondrial-like	Thiamine metabolism (ko00730)	--	--	--	--	--	--	uncharacterized protein LOC102663387 [Glycine max]
Glyma.03G177100.Wm82.a2.v1	0.292995	0.652927	0.00219746	1.16106	up	--	--	Biological Process: cytoplasmic translation (GO:0002181);; Cellular Component: cytosol (GO:0005829);; Molecular Function: metal ion binding (GO:0046872);;	K06185|2.0e-38|ota:OT_ostta05g02390|K06185 ATP-binding cassette, subfamily F, member 2 | (RefSeq) ABC transporter, conserved site	--	[R]	General function prediction only	DRG Family Regulatory Proteins, Tma46	Zinc finger CCCH domain-containing protein 11 OS=Oryza sativa subsp. japonica OX=39947 GN=Os01g0834700 PE=2 SV=2	S	Function unknown	zinc finger CCCH domain-containing protein 11 [Glycine max]
Glyma.07G156100.Wm82.a2.v1	32.1509	73.2786	9.38884e-23	1.22031	up	[V]	Defense mechanisms	Molecular Function: antiporter activity (GO:0015297);; Cellular Component: integral component of membrane (GO:0016021);; Molecular Function: xenobiotic transporter activity (GO:0042910);;	K20456|7.2e-101|smo:SELMODRAFT_417928|K20456 oxysterol-binding protein 1 | (RefSeq) hypothetical protein	--	[R]	General function prediction only	MatE	Protein DETOXIFICATION 44, chloroplastic OS=Arabidopsis thaliana OX=3702 GN=DTX44 PE=2 SV=1	V	Defense mechanisms	protein DETOXIFICATION 44, chloroplastic isoform X1 [Glycine max]
Glyma.04G069600.Wm82.a2.v1	0.193282	0.484027	0.0065103	1.0968	up	[HI]	Coenzyme transport and metabolism;; Lipid transport and metabolism	Molecular Function: 1-deoxy-D-xylulose-5-phosphate synthase activity (GO:0008661);; Biological Process: terpenoid biosynthetic process (GO:0016114);; Molecular Function: transferase activity, transferring aldehyde or ketonic groups (GO:0016744);;	K01662|0.0e+00|gmx:100787937|K01662 1-deoxy-D-xylulose-5-phosphate synthase [EC:2.2.1.7] | (RefSeq) probable 1-deoxy-D-xylulose-5-phosphate synthase, chloroplastic isoform X2	Thiamine metabolism (ko00730);; Terpenoid backbone biosynthesis (ko00900)	[G]	Carbohydrate transport and metabolism	1-deoxy-D-xylulose-5-phosphate synthase	Probable 1-deoxy-D-xylulose-5-phosphate synthase, chloroplastic OS=Capsicum annuum OX=4072 GN=TKT2 PE=2 SV=1	G	Carbohydrate transport and metabolism	probable 1-deoxy-D-xylulose-5-phosphate synthase, chloroplastic isoform X1 [Glycine max]
Glyma.06G084200.Wm82.a2.v1	0.455675	4.80747	2.62592e-48	3.41969	up	[F]	Nucleotide transport and metabolism	Molecular Function: catalytic activity (GO:0003824);; Biological Process: nucleoside metabolic process (GO:0009116);;	K07870|8.1e-14|pxb:103958384|K07870 mitochondrial Rho GTPase 1 [EC:3.6.5.-] | (RefSeq) uncharacterized protein LOC103958384	--	--	--	Phosphorylase superfamily	--	F	Nucleotide transport and metabolism	bark storage protein A-like [Glycine soja]
Glyma.01G006200.Wm82.a2.v1	79.0635	31.6425	4.17282e-19	-1.28656	down	--	--	--	--	--	--	--	--	--	--	--	programmed cell death protein 4 [Glycine max]
Glyma.08G284000.Wm82.a2.v1	12.7356	5.49552	5.65299e-10	-1.17482	down	[P]	Inorganic ion transport and metabolism	Cellular Component: integral component of membrane (GO:0016021);; Molecular Function: transmembrane transporter activity (GO:0022857);;	K02575|1.4e-287|gmx:100803196|K02575 MFS transporter, NNP family, nitrate/nitrite transporter | (RefSeq) high affinity nitrate transporter 2.5	Nitrogen metabolism (ko00910)	--	--	Major Facilitator Superfamily	High affinity nitrate transporter 2.5 OS=Arabidopsis thaliana OX=3702 GN=NRT2.5 PE=1 SV=1	P	Inorganic ion transport and metabolism	high affinity nitrate transporter 2.5 [Glycine max]
Glyma.U014500.Wm82.a2.v1	1.09739	2.40111	0.00519719	1.14168	up	--	--	Cellular Component: extracellular region (GO:0005576);; Cellular Component: integral component of membrane (GO:0016021);; Biological Process: sexual reproduction (GO:0019953);;	K20628|6.1e-88|pvu:PHAVU_007G235300g|K20628 expansin | (RefSeq) hypothetical protein	--	--	--	Expansin C-terminal domain	Putative expansin-B2 OS=Arabidopsis thaliana OX=3702 GN=EXPB2 PE=3 SV=2	S	Function unknown	putative expansin-B2-like [Glycine max]
Glyma.11G082300.Wm82.a2.v1	285.562	137.13	1.60111e-17	-1.02054	down	[P]	Inorganic ion transport and metabolism	Cellular Component: integral component of membrane (GO:0016021);;	K22547|1.6e-25|pda:103700882|K22547 arsenate reductase [EC:1.20.4.1] | (RefSeq) thiosulfate sulfurtransferase 18-like	--	[P]	Inorganic ion transport and metabolism	Rhodanese-like domain	Rhodanese-like domain-containing protein 15, chloroplastic OS=Arabidopsis thaliana OX=3702 GN=STR15 PE=2 SV=1	P	Inorganic ion transport and metabolism	hypothetical protein GLYMA_11G082300 [Glycine max]
Glyma.12G134200.Wm82.a2.v1	19.354	44.4575	2.13708e-20	1.23443	up	--	--	Molecular Function: motor activity (GO:0003774);; Cellular Component: cytoplasm (GO:0005737);; Cellular Component: microtubule (GO:0005874);; Biological Process: microtubule-based process (GO:0007017);; Cellular Component: dynein complex (GO:0030286);; Molecular Function: dynein intermediate chain binding (GO:0045505);; Molecular Function: dynein light intermediate chain binding (GO:0051959);; Bi…	K10418|9.2e-26|ccaj:109809816|K10418 dynein light chain LC8-type | (RefSeq) dynein light chain 2, cytoplasmic-like	--	[Z]	Cytoskeleton	Dynein light chain type 1	--	Z	Cytoskeleton	hypothetical protein GLYMA_12G134200 [Glycine max]
Glyma.17G256900.Wm82.a2.v1	1.86126	4.8016	4.51485e-21	1.40492	up	--	--	Biological Process: microtubule cytoskeleton organization (GO:0000226);; Biological Process: cell morphogenesis (GO:0000902);; Biological Process: cell morphogenesis involved in differentiation (GO:0000904);; Molecular Function: molecular_function (GO:0003674);; Molecular Function: binding (GO:0005488);; Molecular Function: protein binding (GO:0005515);; Cellular Component: cellular_component (GO…	--	--	--	--	Filament-like plant protein, long coiled-coil	Filament-like plant protein 4 OS=Arabidopsis thaliana OX=3702 GN=FPP4 PE=1 SV=1	S	Function unknown	filament-like plant protein 4 [Glycine max]
Glyma.17G039300.Wm82.a2.v1	0.321452	0.072699	4.55258e-07	-2.02836	down	[T]	Signal transduction mechanisms	Molecular Function: ATP binding (GO:0005524);; Cellular Component: plasma membrane (GO:0005886);; Cellular Component: integral component of membrane (GO:0016021);; Molecular Function: ATPase activity (GO:0016887);; Molecular Function: ATPase activity, coupled to transmembrane movement of substances (GO:0042626);; Biological Process: transmembrane transport (GO:0055085);;	K08712|8.0e-131|gsl:Gasu_29800|K08712 ATP-binding cassette, subfamily G (WHITE), member 2, SNQ2 | (RefSeq) ABC transporter, ATP-binding protein	ABC transporters (ko02010)	[Q]	Secondary metabolites biosynthesis, transport and catabolism	ABC-2 type transporter	Pleiotropic drug resistance protein 3 OS=Nicotiana tabacum OX=4097 GN=PDR3 PE=2 SV=1	Q	Secondary metabolites biosynthesis, transport and catabolism	pleiotropic drug resistance protein 3 isoform X1 [Glycine max]
Glyma.12G136100.Wm82.a2.v1	0.455771	1.19781	8.91982e-05	1.39131	up	--	--	Cellular Component: Golgi membrane (GO:0000139);; Cellular Component: integral component of membrane (GO:0016021);; Biological Process: pectin biosynthetic process (GO:0045489);; Molecular Function: polygalacturonate 4-alpha-galacturonosyltransferase activity (GO:0047262);; Biological Process: cell wall organization (GO:0071555);;	K20867|1.2e-310|gmx:100783157|K20867 galacturonosyltransferase 12/13/14/15 [EC:2.4.1.-] | (RefSeq) probable galacturonosyltransferase 12	--	--	--	Glycosyl transferase family 8	Probable galacturonosyltransferase 12 OS=Arabidopsis thaliana OX=3702 GN=GAUT12 PE=2 SV=1	G	Carbohydrate transport and metabolism	probable galacturonosyltransferase 12 [Glycine max]
Glyma.09G022900.Wm82.a2.v1	0.519282	1.21305	0.000798413	1.23985	up	--	--	Molecular Function: peroxidase activity (GO:0004601);; Cellular Component: extracellular region (GO:0005576);; Biological Process: response to oxidative stress (GO:0006979);; Molecular Function: heme binding (GO:0020037);; Biological Process: hydrogen peroxide catabolic process (GO:0042744);; Molecular Function: metal ion binding (GO:0046872);;	K00430|7.2e-195|gmx:100814455|K00430 peroxidase [EC:1.11.1.7] | (RefSeq) peroxidase A2	Phenylpropanoid biosynthesis (ko00940)	--	--	Peroxidase	Peroxidase 15 OS=Ipomoea batatas OX=4120 GN=pod PE=1 SV=1	Q	Secondary metabolites biosynthesis, transport and catabolism	peroxidase A2 [Glycine max]
Glyma.07G033300.Wm82.a2.v1	0.420048	0.171189	0.000265082	-1.24807	down	--	--	Molecular Function: zinc ion binding (GO:0008270);; Biological Process: RNA modification (GO:0009451);; Cellular Component: intracellular membrane-bounded organelle (GO:0043231);;	K22262|4.4e-140|qsu:112034235|K22262 WD repeat and FYVE domain-containing protein 3 | (RefSeq) protein SPIRRIG	--	[R]	General function prediction only	PPR repeat family	Pentatricopeptide repeat-containing protein At1g15510, chloroplastic OS=Arabidopsis thaliana OX=3702 GN=PCMP-H73 PE=1 SV=1	S	Function unknown	pentatricopeptide repeat-containing protein At1g15510, chloroplastic [Glycine max]
Glyma.16G220900.Wm82.a2.v1	9.11169	20.6312	3.14613e-14	1.21126	up	[R]	General function prediction only	Molecular Function: acid phosphatase activity (GO:0003993);;	K20728|3.6e-42|thj:104814965|K20728 vegetative storage protein 2 | (RefSeq) vegetative storage protein 2-like	MAPK signaling pathway - plant (ko04016)	--	--	HAD superfamily, subfamily IIIB (Acid phosphatase)	Acid phosphatase 1 OS=Solanum lycopersicum OX=4081 GN=APS1 PE=2 SV=1	S	Function unknown	acid phosphatase 1 [Glycine max]
Glyma.17G132100.Wm82.a2.v1	1.00508	3.3734	4.22846e-10	1.77157	up	[IR]	Lipid transport and metabolism;; General function prediction only	Molecular Function: oxidoreductase activity, acting on CH-OH group of donors (GO:0016614);; Molecular Function: flavin adenine dinucleotide binding (GO:0050660);;	K00108|6.8e-299|pvu:PHAVU_003G213000g|K00108 choline dehydrogenase [EC:1.1.99.1] | (RefSeq) hypothetical protein	Glycine, serine and threonine metabolism (ko00260)	[R]	General function prediction only	GMC oxidoreductase	Protein HOTHEAD OS=Arabidopsis thaliana OX=3702 GN=HTH PE=1 SV=1	E	Amino acid transport and metabolism	protein HOTHEAD [Glycine max]
Glyma.17G041200.Wm82.a2.v1	0.743158	2.23276	0.000156523	1.60653	up	[V]	Defense mechanisms	Molecular Function: ATP binding (GO:0005524);; Cellular Component: integral component of membrane (GO:0016021);; Molecular Function: ATPase activity (GO:0016887);; Molecular Function: ATPase activity, coupled to transmembrane movement of substances (GO:0042626);; Biological Process: transmembrane transport (GO:0055085);;	K05658|0.0e+00|gmx:100776122|K05658 ATP-binding cassette, subfamily B (MDR/TAP), member 1 [EC:7.6.2.2] | (RefSeq) ABC transporter B family member 11	ABC transporters (ko02010)	[Q]	Secondary metabolites biosynthesis, transport and catabolism	ABC transporter transmembrane region	ABC transporter B family member 11 OS=Arabidopsis thaliana OX=3702 GN=ABCB11 PE=2 SV=1	Q	Secondary metabolites biosynthesis, transport and catabolism	ABC transporter B family member 11 [Glycine max]
Glyma.15G157700.Wm82.a2.v1	4.2782	1.12974	2.00165e-12	-1.83602	down	--	--	Molecular Function: CDP-diacylglycerol-inositol 3-phosphatidyltransferase activity (GO:0003881);; Cellular Component: Golgi apparatus (GO:0005794);; Biological Process: phosphatidylinositol biosynthetic process (GO:0006661);; Molecular Function: methyltransferase activity (GO:0008168);;	K22857|4.0e-99|mdm:103430747|K22857 EEF1A lysine methyltransferase 4 [EC:2.1.1.-] | (RefSeq) EEF1A lysine methyltransferase 4	--	[E]	Amino acid transport and metabolism	Methyltransferase domain	--	E	Amino acid transport and metabolism	hypothetical protein GLYMA_15G157700 [Glycine max]
Glyma.18G060300.Wm82.a2.v1	0.919757	0.265874	0.000250923	-1.65367	down	--	--	Molecular Function: zinc ion transmembrane transporter activity (GO:0005385);; Cellular Component: integral component of membrane (GO:0016021);;	K14709|1.7e-177|gmx:100802186|K14709 solute carrier family 39 (zinc transporter), member 1/2/3 | (RefSeq) zinc transporter 6, chloroplastic	--	[P]	Inorganic ion transport and metabolism	ZIP Zinc transporter	Zinc transporter 6, chloroplastic OS=Arabidopsis thaliana OX=3702 GN=ZIP6 PE=3 SV=1	P	Inorganic ion transport and metabolism	zinc transporter 6, chloroplastic [Glycine max]
Glyma.02G052700.Wm82.a2.v1	2.36013	0.694617	1.24165e-10	-1.71921	down	--	--	Molecular Function: peroxidase activity (GO:0004601);; Cellular Component: extracellular region (GO:0005576);; Biological Process: response to oxidative stress (GO:0006979);; Molecular Function: heme binding (GO:0020037);; Biological Process: hydrogen peroxide catabolic process (GO:0042744);; Molecular Function: metal ion binding (GO:0046872);;	K00430|9.5e-189|gmx:100777733|K00430 peroxidase [EC:1.11.1.7] | (RefSeq) peroxidase 72	Phenylpropanoid biosynthesis (ko00940)	--	--	Peroxidase	Peroxidase 72 OS=Arabidopsis thaliana OX=3702 GN=PER72 PE=1 SV=1	Q	Secondary metabolites biosynthesis, transport and catabolism	peroxidase 72 [Glycine max]
Glyma.02G129900.Wm82.a2.v1	3.40551	7.61683	4.80637e-12	1.20582	up	--	--	--	--	--	--	--	--	--	--	--	uncharacterized protein LOC100785574 precursor [Glycine max]
Glyma.06G309200.Wm82.a2.v1	0.576046	9.78351	3.07152e-08	4.03088	up	--	--	Molecular Function: DNA binding (GO:0003677);; Cellular Component: nucleus (GO:0005634);;	K15397|1.9e-22|cpep:111776416|K15397 3-ketoacyl-CoA synthase [EC:2.3.1.199] | (RefSeq) 3-ketoacyl-CoA synthase 17-like	Fatty acid elongation (ko00062);; Plant-pathogen interaction (ko04626)	[O]	Posttranslational modification, protein turnover, chaperones	--	Protein RADIALIS-like 1 OS=Arabidopsis thaliana OX=3702 GN=RL1 PE=2 SV=1	K	Transcription	protein RADIALIS-like 3 [Glycine max]
Glyma.13G252800.Wm82.a2.v1	0.679571	2.50701	1.96889e-12	1.90762	up	[R]	General function prediction only	Cellular Component: integral component of membrane (GO:0016021);;	K16302|1.4e-229|gmx:100795897|K16302 metal transporter CNNM | (RefSeq) DUF21 domain-containing protein At4g33700 isoform X1	--	[S]	Function unknown	Cyclin M transmembrane N-terminal domain	DUF21 domain-containing protein At4g33700 OS=Arabidopsis thaliana OX=3702 GN=CBSDUF6 PE=1 SV=1	S	Function unknown	DUF21 domain-containing protein At4g33700 isoform X1 [Glycine max]
Glyma.17G140600.Wm82.a2.v1	19.0644	41.8286	8.21628e-18	1.18196	up	[C]	Energy production and conversion	Molecular Function: L-lactate dehydrogenase activity (GO:0004459);; Cellular Component: cytoplasm (GO:0005737);; Biological Process: carbohydrate metabolic process (GO:0005975);; Biological Process: carboxylic acid metabolic process (GO:0019752);;	K00016|2.7e-194|gmx:100803035|K00016 L-lactate dehydrogenase [EC:1.1.1.27] | (RefSeq) L-lactate dehydrogenase A	Glycolysis / Gluconeogenesis (ko00010);; Cysteine and methionine metabolism (ko00270);; Pyruvate metabolism (ko00620);; Propanoate metabolism (ko00640)	[C]	Energy production and conversion	lactate/malate dehydrogenase, NAD binding domain	L-lactate dehydrogenase A OS=Hordeum vulgare OX=4513 PE=1 SV=1	C	Energy production and conversion	L-lactate dehydrogenase A [Glycine max]
Glyma.07G254600.Wm82.a2.v1	0.2484	0.763132	0.000159908	1.6106	up	--	--	Cellular Component: cytoplasm (GO:0005737);; Molecular Function: UDP-glycosyltransferase activity (GO:0008194);; Cellular Component: intracellular membrane-bounded organelle (GO:0043231);;	K23260|4.9e-178|cam:101489464|K23260 scopoletin glucosyltransferase [EC:2.4.1.128] | (RefSeq) UGT73F5; UDP-glucose flavonoid 3-O-glucosyltransferase 7	Phenylpropanoid biosynthesis (ko00940)	[GC]	Carbohydrate transport and metabolism;; Energy production and conversion	UDP-glucoronosyl and UDP-glucosyl transferase	UDP-glucose flavonoid 3-O-glucosyltransferase 7 OS=Fragaria ananassa OX=3747 GN=GT7 PE=1 SV=1	--	--	glucosyltransferase [Glycine max]
Glyma.18G059600.Wm82.a2.v1	1.52524	3.04388	1.37015e-07	1.02828	up	[T]	Signal transduction mechanisms	Molecular Function: protein kinase activity (GO:0004672);; Molecular Function: ATP binding (GO:0005524);; Cellular Component: integral component of membrane (GO:0016021);;	K13430|2.4e-32|pxb:103938514|K13430 serine/threonine-protein kinase PBS1 [EC:2.7.11.1] | (RefSeq) serine/threonine-protein kinase CDL1-like isoform X1	Plant-pathogen interaction (ko04626)	--	--	Protein tyrosine and serine/threonine kinase	Protein MALE DISCOVERER 2 OS=Arabidopsis thaliana OX=3702 GN=MDIS2 PE=1 SV=1	T	Signal transduction mechanisms	inactive receptor-like serine/threonine-protein kinase At2g40270 [Glycine max]
Glyma.14G122000.Wm82.a2.v1	0.718848	2.29285	0.00039965	1.6498	up	--	--	Cellular Component: integral component of membrane (GO:0016021);;	--	--	--	--	--	Protein TRACHEARY ELEMENT DIFFERENTIATION-RELATED 7A OS=Zinnia violacea OX=34245 GN=TED7 PE=2 SV=1	S	Function unknown	hypothetical protein GLYMA_14G122000 [Glycine max]
Glyma.06G312200.Wm82.a2.v1	0.207525	0.492963	3.02654e-05	1.27402	up	[K]	Transcription	Molecular Function: nucleic acid binding (GO:0003676);; Biological Process: transcription elongation from RNA polymerase II promoter (GO:0006368);; Cellular Component: transcription elongation factor complex (GO:0008023);; Molecular Function: nucleosome binding (GO:0031491);; Biological Process: positive regulation of transcription elongation from RNA polymerase II promoter (GO:0032968);; Biologi…	K11292|0.0e+00|gmx:100804204|K11292 transcription elongation factor SPT6 | (RefSeq) transcription elongation factor SPT6-like	--	[A]	RNA processing and modification	SH2 domain	Transcription elongation factor SPT6 homolog OS=Arabidopsis thaliana OX=3702 GN=SPT6 PE=1 SV=1	K	Transcription	transcription elongation factor SPT6-like [Glycine max]
Glyma.08G306600.Wm82.a2.v1	0.579395	1.22991	0.000966805	1.09719	up	--	--	Biological Process: male meiosis II (GO:0007142);;	--	--	--	--	--	Protein JASON OS=Arabidopsis thaliana OX=3702 GN=JASON PE=2 SV=1	--	--	protein JASON [Glycine max]
Glyma.06G163000.Wm82.a2.v1	5.12129	2.33906	4.47779e-09	-1.04908	down	--	--	Cellular Component: cellular_component (GO:0005575);; Cellular Component: intracellular (GO:0005622);; Cellular Component: cell (GO:0005623);; Cellular Component: cytoplasm (GO:0005737);; Cellular Component: vacuole (GO:0005773);; Cellular Component: organelle (GO:0043226);; Cellular Component: membrane-bounded organelle (GO:0043227);; Cellular Component: intracellular organelle (GO:0043229);; Ce…	--	--	--	--	--	Uncharacterized protein At4g14100 OS=Arabidopsis thaliana OX=3702 GN=At4g14100 PE=2 SV=1	S	Function unknown	uncharacterized protein LOC100306330 precursor [Glycine max]
Glyma.02G308700.Wm82.a2.v1	6.99034	25.3393	2.11029e-34	1.89355	up	--	--	Cellular Component: anchored component of plasma membrane (GO:0046658);;	--	--	--	--	Fasciclin domain	Fasciclin-like arabinogalactan protein 2 OS=Arabidopsis thaliana OX=3702 GN=FLA2 PE=2 SV=1	S	Function unknown	fasciclin-like arabinogalactan protein 2 [Glycine max]
Glyma.06G273600.Wm82.a2.v1	1.49816	3.68301	1.04245e-05	1.33453	up	[O]	Posttranslational modification, protein turnover, chaperones	Molecular Function: cysteine-type endopeptidase activity (GO:0004197);; Cellular Component: extracellular space (GO:0005615);; Cellular Component: lysosome (GO:0005764);; Biological Process: proteolysis involved in cellular protein catabolic process (GO:0051603);;	K16292|2.2e-111|jre:108997808|K16292 KDEL-tailed cysteine endopeptidase [EC:3.4.22.-] | (RefSeq) senescence-specific cysteine protease SAG39-like	--	[O]	Posttranslational modification, protein turnover, chaperones	Papain family cysteine protease	Senescence-specific cysteine protease SAG39 OS=Oryza sativa subsp. indica OX=39946 GN=OsI_14861 PE=3 SV=1	O	Posttranslational modification, protein turnover, chaperones	senescence-specific cysteine protease SAG39 [Glycine max]
Glyma.15G114800.Wm82.a2.v1	1.94083	3.82788	1.949e-06	1.00991	up	--	--	Molecular Function: Rho GDP-dissociation inhibitor activity (GO:0005094);; Cellular Component: cytosol (GO:0005829);; Biological Process: Rho protein signal transduction (GO:0007266);; Cellular Component: membrane (GO:0016020);; Molecular Function: Rac GTPase binding (GO:0048365);;	K12462|8.6e-121|gmx:100813326|K12462 Rho GDP-dissociation inhibitor | (RefSeq) rho GDP-dissociation inhibitor 1	--	[T]	Signal transduction mechanisms	RHO protein GDP dissociation inhibitor	Rho GDP-dissociation inhibitor 1 OS=Arabidopsis thaliana OX=3702 GN=GDI1 PE=1 SV=1	T	Signal transduction mechanisms	rho GDP-dissociation inhibitor 1 [Glycine max]
Glyma.04G040600.Wm82.a2.v1	0.600264	1.66821	7.30669e-05	1.498	up	--	--	Cellular Component: integral component of membrane (GO:0016021);; Biological Process: protein ubiquitination (GO:0016567);; Cellular Component: Cul4A-RING E3 ubiquitin ligase complex (GO:0031464);;	--	--	--	--	Sulfite exporter TauE/SafE	Sulfite exporter TauE/SafE family protein 3 OS=Arabidopsis thaliana OX=3702 GN=At2g25737 PE=2 SV=1	S	Function unknown	sulfite exporter TauE/SafE family protein 3 [Glycine max]
Glyma.13G097800.Wm82.a2.v1	2.56578	1.10812	3.22247e-05	-1.18652	down	[H]	Coenzyme transport and metabolism	Cellular Component: integral component of membrane (GO:0016021);; Molecular Function: transferase activity, transferring alkyl or aryl (other than methyl) groups (GO:0016765);;	K09833|3.9e-209|gmx:100819685|K09833 homogentisate phytyltransferase / homogentisate geranylgeranyltransferase [EC:2.5.1.115 2.5.1.116] | (RefSeq) VTE2-1; homogentisate phytyltransferase 1, chloroplastic-like	Ubiquinone and other terpenoid-quinone biosynthesis (ko00130)	--	--	UbiA prenyltransferase family	Homogentisate phytyltransferase 1, chloroplastic OS=Arabidopsis thaliana OX=3702 GN=HPT1 PE=1 SV=1	H	Coenzyme transport and metabolism	homogentisate phytyltransferase 1, chloroplastic-like isoform X1 [Glycine max]
Glyma.13G193800.Wm82.a2.v1	1.56438	4.98775	0.000159298	1.66106	up	--	--	Biological Process: positive regulation of sequence-specific DNA binding transcription factor activity (GO:0051091);;	--	--	--	--	VQ motif	--	S	Function unknown	hypothetical protein GLYMA_13G193800, partial [Glycine max]
Glyma.11G105800.Wm82.a2.v1	19.6126	5.03729	1.29084e-10	-1.92404	down	[O]	Posttranslational modification, protein turnover, chaperones	Cellular Component: cellular_component (GO:0005575);; Cellular Component: intracellular (GO:0005622);; Cellular Component: cell (GO:0005623);; Cellular Component: nucleus (GO:0005634);; Cellular Component: cytoplasm (GO:0005737);; Cellular Component: chloroplast (GO:0009507);; Cellular Component: plastid (GO:0009536);; Cellular Component: organelle (GO:0043226);; Cellular Component: membrane-boun…	K03686|2.2e-11|dcr:108221001|K03686 molecular chaperone DnaJ | (RefSeq) chaperone protein dnaJ A6, chloroplastic-like	--	[O]	Posttranslational modification, protein turnover, chaperones	DnaJ domain	Chaperone protein dnaJ 11, chloroplastic OS=Arabidopsis thaliana OX=3702 GN=ATJ11 PE=1 SV=2	O	Posttranslational modification, protein turnover, chaperones	uncharacterized protein LOC100305807 [Glycine max]
Glyma.14G032200.Wm82.a2.v1	20.7433	7.77809	1.54866e-20	-1.37909	down	--	--	Cellular Component: nucleus (GO:0005634);; Molecular Function: protein dimerization activity (GO:0046983);;	K16189|0.0e+00|gmx:100811345|K16189 phytochrome-interacting factor 4 | (RefSeq) transcription factor PIF4	Plant hormone signal transduction (ko04075)	--	--	Helix-loop-helix DNA-binding domain	Transcription factor PIF4 OS=Arabidopsis thaliana OX=3702 GN=PIF4 PE=1 SV=1	K	Transcription	transcription factor PIF4 [Glycine max]
Glyma.17G046500.Wm82.a2.v1	31.4416	66.861	4.95655e-15	1.12451	up	[O]	Posttranslational modification, protein turnover, chaperones	Cellular Component: cytoplasm (GO:0005737);; Molecular Function: thioredoxin peroxidase activity (GO:0008379);; Cellular Component: chloroplast thylakoid membrane (GO:0009535);; Biological Process: cellular response to oxidative stress (GO:0034599);; Biological Process: cell redox homeostasis (GO:0045454);;	K03564|3.0e-119|gmx:100500610|K03564 thioredoxin-dependent peroxiredoxin [EC:1.11.1.24] | (RefSeq) thioredoxin superfamily protein	--	[O]	Posttranslational modification, protein turnover, chaperones	AhpC/TSA family	Peroxiredoxin Q, chloroplastic OS=Populus jackii OX=640484 GN=PRXQ PE=1 SV=1	O	Posttranslational modification, protein turnover, chaperones	thioredoxin superfamily protein [Glycine max]
Glyma.11G239300.Wm82.a2.v1	0.451333	1.2573	4.2689e-05	1.29917	up	[G]	Carbohydrate transport and metabolism	Molecular Function: trehalose-phosphatase activity (GO:0004805);; Biological Process: trehalose biosynthetic process (GO:0005992);;	K01087|2.2e-210|gmx:100794430|K01087 trehalose 6-phosphate phosphatase [EC:3.1.3.12] | (RefSeq) probable trehalose-phosphate phosphatase J	Starch and sucrose metabolism (ko00500)	[G]	Carbohydrate transport and metabolism	Trehalose-phosphatase	Probable trehalose-phosphate phosphatase J OS=Arabidopsis thaliana OX=3702 GN=TPPJ PE=1 SV=1	G	Carbohydrate transport and metabolism	probable trehalose-phosphate phosphatase J [Glycine max]
Glyma.16G057600.Wm82.a2.v1	17.0759	5.55362	2.13788e-12	-1.58163	down	[P]	Inorganic ion transport and metabolism	Molecular Function: voltage-gated chloride channel activity (GO:0005247);; Molecular Function: nitrate:proton symporter activity (GO:0009671);; Cellular Component: plant-type vacuole membrane (GO:0009705);; Molecular Function: nitrate transmembrane transporter activity (GO:0015112);; Cellular Component: integral component of membrane (GO:0016021);; Molecular Function: transmembrane transporter ac…	K05016|0.0e+00|gmx:100778395|K05016 chloride channel 7 | (RefSeq) chloride channel protein CLC-b	--	[P]	Inorganic ion transport and metabolism	Voltage gated chloride channel	Chloride channel protein CLC-b OS=Arabidopsis thaliana OX=3702 GN=CLC-B PE=1 SV=1	P	Inorganic ion transport and metabolism	hypothetical protein GLYMA_16G057600 [Glycine max]
Glyma.01G152000.Wm82.a2.v1	1.20434	0.550408	0.000643605	-1.10013	down	--	--	Molecular Function: transferase activity, transferring acyl groups other than amino-acyl groups (GO:0016747);;	K19861|1.8e-145|vvi:100263045|K19861 benzyl alcohol O-benzoyltransferase [EC:2.3.1.196 2.3.1.232] | (RefSeq) methanol O-anthraniloyltransferase	--	--	--	Transferase family	Methanol O-anthraniloyltransferase OS=Vitis labrusca OX=103355 GN=AMAT PE=1 SV=1	S	Function unknown	methanol O-anthraniloyltransferase [Glycine max]
Glyma.19G239800.Wm82.a2.v1	1.76714	0.156033	1.78375e-11	-3.4942	down	[E]	Amino acid transport and metabolism	Molecular Function: 3-dehydroquinate dehydratase activity (GO:0003855);; Molecular Function: shikimate 3-dehydrogenase (NADP+) activity (GO:0004764);; Biological Process: chorismate biosynthetic process (GO:0009423);; Biological Process: shikimate metabolic process (GO:0019632);;	K13832|2.6e-246|gmx:100788604|K13832 3-dehydroquinate dehydratase / shikimate dehydrogenase [EC:4.2.1.10 1.1.1.25] | (RefSeq) bifunctional 3-dehydroquinate dehydratase/shikimate dehydrogenase, chloroplastic isoform X2	Phenylalanine, tyrosine and tryptophan biosynthesis (ko00400);; Biosynthesis of amino acids (ko01230)	[E]	Amino acid transport and metabolism	Type I 3-dehydroquinase	Bifunctional 3-dehydroquinate dehydratase/shikimate dehydrogenase, chloroplastic OS=Arabidopsis thaliana OX=3702 GN=EMB3004 PE=1 SV=1	E	Amino acid transport and metabolism	hypothetical protein GLYMA_19G239800 [Glycine max]
Glyma.16G172600.Wm82.a2.v1	1.90266	3.72495	1.87649e-08	1.01034	up	[V]	Defense mechanisms	Cellular Component: plant-type vacuole (GO:0000325);; Molecular Function: ATP binding (GO:0005524);; Cellular Component: vacuolar membrane (GO:0005774);; Cellular Component: membrane (GO:0016020);; Cellular Component: integral component of membrane (GO:0016021);; Molecular Function: ATPase activity (GO:0016887);; Molecular Function: ATPase activity, coupled to transmembrane movement of substances…	K05666|0.0e+00|gmx:100787314|K05666 ATP-binding cassette, subfamily C (CFTR/MRP), member 2 | (RefSeq) ABC transporter C family member 10	ABC transporters (ko02010)	[Q]	Secondary metabolites biosynthesis, transport and catabolism	ABC transporter	ABC transporter C family member 10 OS=Arabidopsis thaliana OX=3702 GN=ABCC10 PE=2 SV=2	Q	Secondary metabolites biosynthesis, transport and catabolism	hypothetical protein GLYMA_16G172600 [Glycine max]
Glyma.01G180700.Wm82.a2.v1	7.19685	3.30807	3.67423e-08	-1.0952	down	--	--	Cellular Component: plasma membrane (GO:0005886);; Cellular Component: membrane (GO:0016020);; Cellular Component: integral component of membrane (GO:0016021);;	--	--	--	--	Domain of unknown function (DUF588)	CASP-like protein ARALYDRAFT_485429 OS=Arabidopsis lyrata subsp. lyrata OX=81972 GN=ARALYDRAFT_485429 PE=3 SV=2	S	Function unknown	uncharacterized protein LOC100819922 [Glycine max]
Glyma.07G021100.Wm82.a2.v1	0.892507	1.80312	0.000219384	1.0274	up	[T]	Signal transduction mechanisms	Molecular Function: protein serine/threonine kinase activity (GO:0004674);; Molecular Function: ATP binding (GO:0005524);;	K07760|1.3e-182|gmx:100805119|K07760 cyclin-dependent kinase [EC:2.7.11.22] | (RefSeq) cell division control protein 2 homolog C isoform X1	--	[R]	General function prediction only	Protein kinase domain	Cyclin-dependent kinase B1-1 OS=Arabidopsis thaliana OX=3702 GN=CDKB1-1 PE=1 SV=2	T	Signal transduction mechanisms	cell division control protein 2 homolog C isoform X1 [Glycine max]
Glyma.10G013700.Wm82.a2.v1	97.6776	24.9969	2.93487e-66	-1.92581	down	[T]	Signal transduction mechanisms	Molecular Function: nucleotide binding (GO:0000166);; Molecular Function: molecular_function (GO:0003674);; Molecular Function: binding (GO:0005488);; Cellular Component: cellular_component (GO:0005575);; Cellular Component: cell (GO:0005623);; Cellular Component: plasma membrane (GO:0005886);; Molecular Function: drug binding (GO:0008144);; Cellular Component: membrane (GO:0016020);; Molecular F…	--	--	--	--	Universal stress protein family	--	T	Signal transduction mechanisms	uncharacterized protein LOC100306535 [Glycine max]
Glyma.06G297600.Wm82.a2.v1	3.34867	0.868421	1.10025e-09	-1.88574	down	--	--	--	--	--	--	--	Wound-induced protein	--	S	Function unknown	uncharacterized protein LOC100817911 [Glycine max]
Glyma.12G217400.Wm82.a2.v1	34.5485	84.201	1.73395e-13	1.33218	up	--	--	--	--	--	--	--	BURP domain	Embryonic abundant protein USP92 OS=Vicia faba OX=3906 PE=2 SV=1	S	Function unknown	Sali3-2 precursor [Glycine max]
Glyma.12G195500.Wm82.a2.v1	0.414779	1.18129	6.13443e-05	1.50324	up	--	--	Molecular Function: peroxidase activity (GO:0004601);; Cellular Component: extracellular region (GO:0005576);; Biological Process: response to oxidative stress (GO:0006979);; Cellular Component: plant-type cell wall (GO:0009505);; Cellular Component: plasmodesma (GO:0009506);; Molecular Function: heme binding (GO:0020037);; Biological Process: hydrogen peroxide catabolic process (GO:0042744);; Mo…	K00430|4.8e-185|gmx:547871|K00430 peroxidase [EC:1.11.1.7] | (RefSeq) peroxidase 3	Phenylpropanoid biosynthesis (ko00940)	--	--	Peroxidase	Peroxidase 3 OS=Arabidopsis thaliana OX=3702 GN=PER3 PE=2 SV=1	Q	Secondary metabolites biosynthesis, transport and catabolism	peroxidase 3 [Glycine max]
Glyma.02G242400.Wm82.a2.v1	7.73332	3.04164	2.98713e-18	-1.26842	down	--	--	Molecular Function: regulatory region nucleic acid binding (GO:0001067);; Molecular Function: molecular_function (GO:0003674);; Molecular Function: nucleic acid binding (GO:0003676);; Molecular Function: DNA binding (GO:0003677);; Molecular Function: transcription factor activity, sequence-specific DNA binding (GO:0003700);; Molecular Function: binding (GO:0005488);; Cellular Component: cellular_…	--	--	--	--	--	Zinc finger protein 4 OS=Arabidopsis thaliana OX=3702 GN=ZFP4 PE=2 SV=2	S	Function unknown	zinc finger protein 4 [Glycine max]
Glyma.10G201100.Wm82.a2.v1	1.79212	4.64086	3.38239e-13	1.40319	up	[T]	Signal transduction mechanisms	Molecular Function: magnesium ion binding (GO:0000287);; Molecular Function: pyruvate kinase activity (GO:0004743);; Cellular Component: cytoplasm (GO:0005737);; Biological Process: glycolytic process (GO:0006096);; Molecular Function: kinase activity (GO:0016301);; Molecular Function: potassium ion binding (GO:0030955);;	K00873|1.1e-298|gmx:100790371|K00873 pyruvate kinase [EC:2.7.1.40] | (RefSeq) pyruvate kinase 1, cytosolic isoform X1	Glycolysis / Gluconeogenesis (ko00010);; Purine metabolism (ko00230);; Pyruvate metabolism (ko00620);; Carbon metabolism (ko01200);; Biosynthesis of amino acids (ko01230)	[G]	Carbohydrate transport and metabolism	Pyruvate kinase, barrel domain	Pyruvate kinase 1, cytosolic OS=Oryza sativa subsp. indica OX=39946 GN=OsI_35105 PE=3 SV=1	G	Carbohydrate transport and metabolism	pyruvate kinase 1, cytosolic isoform X1 [Glycine max]
Glyma.03G172900.Wm82.a2.v1	17.6731	4.63439	7.81253e-26	-1.89817	down	--	--	Cellular Component: plasma membrane (GO:0005886);; Cellular Component: integral component of membrane (GO:0016021);; Molecular Function: transmembrane transporter activity (GO:0022857);;	K17500|4.6e-54|nto:104085001|K17500 integrin-linked kinase-associated serine/threonine phosphatase 2C [EC:3.1.3.16] | (RefSeq) WAT1-related protein At3g18200 isoform X1	--	--	--	EamA-like transporter family	WAT1-related protein At2g37460 OS=Arabidopsis thaliana OX=3702 GN=At2g37460 PE=2 SV=1	S	Function unknown	WAT1-related protein At2g37460 [Glycine max]
Glyma.06G271200.Wm82.a2.v1	27.1736	12.5342	4.41826e-19	-1.08105	down	--	--	Molecular Function: ion channel activity (GO:0005216);; Cellular Component: integral component of membrane (GO:0016021);;	K05391|0.0e+00|gmx:100783341|K05391 cyclic nucleotide gated channel, plant | (RefSeq) cyclic nucleotide-gated ion channel 4	Plant-pathogen interaction (ko04626)	[PT]	Inorganic ion transport and metabolism;; Signal transduction mechanisms	Ion transport protein	Cyclic nucleotide-gated ion channel 4 OS=Arabidopsis thaliana OX=3702 GN=CNGC4 PE=2 SV=2	P	Inorganic ion transport and metabolism	cyclic nucleotide-gated ion channel 4 [Glycine max]
Glyma.17G202700.Wm82.a2.v1	29.378	10.4668	1.36878e-19	-1.47782	down	--	--	Cellular Component: nucleus (GO:0005634);; Biological Process: ubiquitin-dependent protein catabolic process (GO:0006511);; Molecular Function: zinc ion binding (GO:0008270);; Biological Process: protein ubiquitination (GO:0016567);; Molecular Function: ubiquitin protein ligase activity (GO:0061630);;	K10144|3.8e-171|gmx:100803569|K10144 RING finger and CHY zinc finger domain-containing protein 1 [EC:2.3.2.27] | (RefSeq) probable E3 ubiquitin-protein ligase RZFP34 isoform X1	Ubiquitin mediated proteolysis (ko04120)	[R]	General function prediction only	Zinc-ribbon	Probable E3 ubiquitin-protein ligase RZFP34 OS=Oryza sativa subsp. japonica OX=39947 GN=RZFP34 PE=2 SV=1	O	Posttranslational modification, protein turnover, chaperones	probable E3 ubiquitin-protein ligase RZFP34 isoform X1 [Glycine max]
Glyma.04G033400.Wm82.a2.v1	6.20265	2.20793	4.41881e-07	-1.46155	down	--	--	--	--	--	--	--	--	--	--	--	hypothetical protein glysoja_019642 [Glycine soja]
Glyma.14G093600.Wm82.a2.v1	3.68689	9.21462	1.18996e-15	1.38086	up	--	--	Cellular Component: integral component of membrane (GO:0016021);;	K18266|2.5e-139|vvi:100262295|K18266 protein NDRG1 | (RefSeq) pollen-specific protein SF21	--	[S]	Function unknown	Ndr family	Protein NDL2 OS=Arabidopsis thaliana OX=3702 GN=NDL2 PE=1 SV=1	S	Function unknown	protein NDL2 [Glycine max]
Glyma.17G158600.Wm82.a2.v1	1.68565	3.37414	8.28601e-05	1.03898	up	--	--	--	--	--	--	--	--	--	--	--	hypothetical protein glysoja_013042 [Glycine soja]
Glyma.15G129000.Wm82.a2.v1	0.203083	0.816626	2.65479e-07	1.97737	up	--	--	Molecular Function: peroxidase activity (GO:0004601);; Cellular Component: extracellular region (GO:0005576);; Biological Process: response to oxidative stress (GO:0006979);; Molecular Function: heme binding (GO:0020037);; Biological Process: hydrogen peroxide catabolic process (GO:0042744);; Molecular Function: metal ion binding (GO:0046872);;	K00430|5.5e-195|gmx:106794224|K00430 peroxidase [EC:1.11.1.7] | (RefSeq) peroxidase A2	Phenylpropanoid biosynthesis (ko00940)	--	--	Peroxidase	Peroxidase 15 OS=Ipomoea batatas OX=4120 GN=pod PE=1 SV=1	Q	Secondary metabolites biosynthesis, transport and catabolism	peroxidase A2 [Glycine max]
Glyma.15G009500.Wm82.a2.v1	2.22257	0.440629	0.00376524	-2.31999	down	[Q]	Secondary metabolites biosynthesis, transport and catabolism	--	K08234|1.6e-09|nnu:104590407|K08234 glyoxylase I family protein | (RefSeq) uncharacterized LOC104590407	--	--	--	Glyoxalase/Bleomycin resistance protein/Dioxygenase superfamily	--	S	Function unknown	putative lactoylglutathione lyase [Glycine max]
Glyma.19G255200.Wm82.a2.v1	4.37157	11.6605	1.02422e-20	1.46349	up	--	--	--	K01513|8.9e-108|ats:109769794|K01513 ectonucleotide pyrophosphatase/phosphodiesterase family member 1/3 [EC:3.1.4.1 3.6.1.9] | (RefSeq) uncharacterized protein LOC109769794	Purine metabolism (ko00230);; Pyrimidine metabolism (ko00240);; Starch and sucrose metabolism (ko00500);; Riboflavin metabolism (ko00740);; Nicotinate and nicotinamide metabolism (ko00760);; Pantothenate and CoA biosynthesis (ko00770)	--	--	Plant protein 1589 of unknown function (A_thal_3526)	--	S	Function unknown	uncharacterized protein LOC100791101 [Glycine max]
Glyma.16G160600.Wm82.a2.v1	0.817635	3.22524	3.45591e-18	2.00136	up	--	--	Molecular Function: transaminase activity (GO:0008483);; Molecular Function: carbon-sulfur lyase activity (GO:0016846);;	K14548|6.5e-156|mesc:110609029|K14548 U3 small nucleolar RNA-associated protein 4 | (RefSeq) LOW QUALITY PROTEIN: U3 small nucleolar RNA-associated protein 4 homolog	Ribosome biogenesis in eukaryotes (ko03008)	--	--	Allinase	Tryptophan aminotransferase-related protein 4 OS=Arabidopsis thaliana OX=3702 GN=TAR4 PE=2 SV=2	S	Function unknown	Tryptophan aminotransferase-related protein 4 isoform A [Glycine soja]
Glyma.16G151500.Wm82.a2.v1	18.6764	8.56679	1.95824e-11	-1.08169	down	--	--	Molecular Function: DNA binding (GO:0003677);; Cellular Component: nucleus (GO:0005634);; Biological Process: regulation of transcription, DNA-templated (GO:0006355);;	K00521|1.2e-40|cmos:111447866|K00521 ferric-chelate reductase [EC:1.16.1.7] | (RefSeq) ferric reduction oxidase 7, chloroplastic-like	--	--	--	No apical meristem (NAM) protein	NAC transcription factor 47 OS=Arabidopsis thaliana OX=3702 GN=NAC047 PE=2 SV=1	K	Transcription	NAC domain-containing protein [Glycine max]
Glyma.02G149300.Wm82.a2.v1	0.386703	1.32282	0.000224207	1.76254	up	[G]	Carbohydrate transport and metabolism	Cellular Component: integral component of membrane (GO:0016021);; Molecular Function: transmembrane transporter activity (GO:0022857);;	K08202|6.7e-72|sot:102591616|K08202 MFS transporter, OCT family, solute carrier family 22 (organic cation transporter), member 4/5 | (RefSeq) organic cation/carnitine transporter 4-like	--	[R]	General function prediction only	Sugar (and other) transporter	Organic cation/carnitine transporter 3 OS=Arabidopsis thaliana OX=3702 GN=OCT3 PE=2 SV=1	S	Function unknown	organic cation/carnitine transporter 3 [Glycine max]
Glyma.15G074800.Wm82.a2.v1	8.43073	1.76675	0.000382547	-2.20849	down	--	--	--	--	--	--	--	PDDEXK-like family of unknown function	--	S	Function unknown	hypothetical protein GLYMA_15G074800 [Glycine max]
Glyma.02G091600.Wm82.a2.v1	1.85445	3.69056	1.1151e-05	1.02475	up	--	--	--	--	--	--	--	--	--	--	--	uncharacterized protein LOC100780746 [Glycine max]
Glyma.08G085700.Wm82.a2.v1	4.10783	11.6477	2.57037e-05	1.53679	up	--	--	--	--	--	--	--	--	--	--	--	hypothetical protein glysoja_025749 [Glycine soja]
Glyma.03G255100.Wm82.a2.v1	4.00014	1.3029	1.38637e-08	-1.57918	down	[G]	Carbohydrate transport and metabolism	Cellular Component: cytoplasm (GO:0005737);; Biological Process: carbohydrate metabolic process (GO:0005975);; Molecular Function: carbohydrate binding (GO:0030246);; Molecular Function: glucose-6-phosphate 1-epimerase activity (GO:0047938);;	K01792|2.0e-188|gmx:100819277|K01792 glucose-6-phosphate 1-epimerase [EC:5.1.3.15] | (RefSeq) putative glucose-6-phosphate 1-epimerase isoform X1	Glycolysis / Gluconeogenesis (ko00010)	[G]	Carbohydrate transport and metabolism	Aldose 1-epimerase	Putative glucose-6-phosphate 1-epimerase OS=Cenchrus ciliaris OX=35872 PE=2 SV=1	G	Carbohydrate transport and metabolism	putative glucose-6-phosphate 1-epimerase isoform X1 [Glycine max]
Glyma.19G018400.Wm82.a2.v1	0.461555	1.95792	1.44605e-06	2.04765	up	--	--	Cellular Component: extracellular region (GO:0005576);; Biological Process: defense response (GO:0006952);;	K12173|4.9e-31|gmx:100794341|K12173 BRCA1-A complex subunit BRE | (RefSeq) BRISC and BRCA1-A complex member 2	Homologous recombination (ko03440)	--	--	Thaumatin family	Thaumatin-like protein OS=Arabidopsis thaliana OX=3702 GN=At1g18250 PE=2 SV=2	T	Signal transduction mechanisms	thaumatin-like protein [Glycine max]
Glyma.03G091100.Wm82.a2.v1	1.54531	5.71654	2.20379e-43	1.92576	up	[NW]	Cell motility;; Extracellular structures	--	K17592|0.0e+00|sita:101760663|K17592 sacsin | (RefSeq) uncharacterized protein LOC101760663	--	--	--	--	Protein NO VEIN OS=Arabidopsis thaliana OX=3702 GN=NOV PE=1 SV=1	--	--	uncharacterized protein LOC100800765 [Glycine max]
Glyma.04G097900.Wm82.a2.v1	0.817668	0.316588	0.00079885	-1.28737	down	[V]	Defense mechanisms	Molecular Function: antiporter activity (GO:0015297);; Cellular Component: integral component of membrane (GO:0016021);; Molecular Function: xenobiotic transporter activity (GO:0042910);;	K03327|9.8e-286|gmx:100500204|K03327 multidrug resistance protein, MATE family | (RefSeq) protein DETOXIFICATION 27	--	[R]	General function prediction only	MatE	Protein DETOXIFICATION 27 OS=Arabidopsis thaliana OX=3702 GN=DTX27 PE=2 SV=1	V	Defense mechanisms	protein DETOXIFICATION 27 [Glycine max]
Glyma.19G159300.Wm82.a2.v1	0.506326	1.54964	5.08915e-05	1.61733	up	[R]	General function prediction only	Cellular Component: integral component of membrane (GO:0016021);;	K24205|3.8e-126|gmx:100787911|K24205 protein lifeguard | (RefSeq) protein LIFEGUARD 4	--	[T]	Signal transduction mechanisms	Inhibitor of apoptosis-promoting Bax1	Protein LIFEGUARD 4 OS=Arabidopsis thaliana OX=3702 GN=LFG4 PE=2 SV=1	T	Signal transduction mechanisms	protein LIFEGUARD 4 [Glycine max]
Glyma.13G071300.Wm82.a2.v1	1.356	0.654478	0.00490111	-1.00195	down	--	--	Cellular Component: plasma membrane (GO:0005886);; Cellular Component: integral component of membrane (GO:0016021);; Molecular Function: transmembrane transporter activity (GO:0022857);;	K17500|6.8e-42|nto:104085001|K17500 integrin-linked kinase-associated serine/threonine phosphatase 2C [EC:3.1.3.16] | (RefSeq) WAT1-related protein At3g18200 isoform X1	--	--	--	EamA-like transporter family	WAT1-related protein At3g28050 OS=Arabidopsis thaliana OX=3702 GN=At3g28050 PE=2 SV=1	S	Function unknown	WAT1-related protein At3g28050 isoform X1 [Glycine max]
Glyma.14G102900.Wm82.a2.v1	9.98264	28.5791	9.79569e-16	1.55387	up	--	--	Molecular Function: transcription factor activity, sequence-specific DNA binding (GO:0003700);; Cellular Component: nucleus (GO:0005634);; Molecular Function: sequence-specific DNA binding (GO:0043565);;	K18834|5.6e-17|cmos:111435147|K18834 WRKY transcription factor 1 | (RefSeq) WRKY transcription factor 1-like	Plant-pathogen interaction (ko04626)	--	--	WRKY DNA -binding domain	Probable WRKY transcription factor 40 OS=Arabidopsis thaliana OX=3702 GN=WRKY40 PE=1 SV=1	K	Transcription	probable WRKY transcription factor 40 [Glycine max]
Glyma.16G009200.Wm82.a2.v1	1.16486	2.63737	1.13892e-07	1.21955	up	[R]	General function prediction only	--	--	--	--	--	von Willebrand factor type A domain	--	S	Function unknown	uncharacterized protein LOC114391185 [Glycine soja]
Glyma.01G127900.Wm82.a2.v1	2.19408	0.69518	9.30028e-09	-1.59874	down	--	--	Cellular Component: integral component of membrane (GO:0016021);;	--	--	--	--	Methyltransferase FkbM domain	--	S	Function unknown	hypothetical protein GLYMA_01G127900 [Glycine max]
Glyma.11G234400.Wm82.a2.v1	0.746773	0.322836	0.000576785	-1.15669	down	--	--	Molecular Function: cyclase activity (GO:0009975);; Cellular Component: integral component of membrane (GO:0016021);; Biological Process: sesquiterpene biosynthetic process (GO:0051762);;	--	--	--	--	Protein of unknown function (DUF2985)	--	S	Function unknown	uncharacterized protein LOC100811964 [Glycine max]
Glyma.16G183600.Wm82.a2.v1	2.46713	1.10596	2.11351e-06	-1.10795	down	--	--	Cellular Component: integral component of membrane (GO:0016021);;	K13466|9.4e-21|tcc:18605675|K13466 EIX receptor 1/2 | (RefSeq) probable LRR receptor-like serine/threonine-protein kinase At4g36180	Plant-pathogen interaction (ko04626)	--	--	Leucine rich repeat	--	S	Function unknown	hypothetical protein GLYMA_16G183600 [Glycine max]
Glyma.01G184600.Wm82.a2.v1	3.95838	7.86806	0.000209259	1.01843	up	[G]	Carbohydrate transport and metabolism	--	K14506|3.0e-15|nnu:109115461|K14506 jasmonic acid-amino synthetase [EC:6.3.2.52] | (RefSeq) uncharacterized LOC109115461	Plant hormone signal transduction (ko04075)	--	--	Protein of unknown function, DUF547	--	S	Function unknown	uncharacterized protein LOC100794704 isoform X2 [Glycine max]
Glyma.02G136200.Wm82.a2.v1	8.79557	2.96896	1.95158e-11	-1.52633	down	[Q]	Secondary metabolites biosynthesis, transport and catabolism	Molecular Function: metal ion binding (GO:0046872);; Molecular Function: dioxygenase activity (GO:0051213);;	K24028|2.9e-50|cam:101505284|K24028 salicylic acid 3-hydroxylase [EC:1.14.11.-] | (RefSeq) 1-aminocyclopropane-1-carboxylate oxidase-like	--	[QR]	Secondary metabolites biosynthesis, transport and catabolism;; General function prediction only	non-haem dioxygenase in morphine synthesis N-terminal	Probable 2-oxoglutarate-dependent dioxygenase At5g05600 OS=Arabidopsis thaliana OX=3702 GN=At5g05600 PE=2 SV=1	Q	Secondary metabolites biosynthesis, transport and catabolism	uncharacterized protein LOC100809985 [Glycine max]
Glyma.08G341800.Wm82.a2.v1	60.0024	28.8108	1.33835e-05	-1.02997	down	--	--	Molecular Function: endopeptidase inhibitor activity (GO:0004866);;	--	--	--	--	Trypsin and protease inhibitor	Trypsin inhibitor A OS=Glycine max OX=3847 GN=KTI3 PE=1 SV=2	--	--	kunitz-type trypsin inhibitor KTI1-like [Glycine max]
Glyma.13G159700.Wm82.a2.v1	7.73695	2.70027	3.24898e-05	-1.45319	down	--	--	--	--	--	--	--	--	--	--	--	hypothetical protein GLYMA_13G159700 [Glycine max]
Glyma.08G329000.Wm82.a2.v1	0.711664	1.41929	0.00359624	1.03601	up	--	--	Cellular Component: integral component of membrane (GO:0016021);;	K17046|1.1e-12|tcc:18593293|K17046 protein DEK | (RefSeq) DNA ligase 1	--	--	--	--	--	--	--	uncharacterized protein LOC100811551 [Glycine max]
Glyma.07G133900.Wm82.a2.v1	0.53702	1.18996	0.00077729	1.17015	up	[DPM]	Cell cycle control, cell division, chromosome partitioning;; Inorganic ion transport and metabolism;; Cell wall/membrane/envelope biogenesis	Molecular Function: ferroxidase activity (GO:0004322);; Molecular Function: copper ion binding (GO:0005507);; Cellular Component: plasma membrane (GO:0005886);; Biological Process: iron ion transport (GO:0006826);; Cellular Component: integral component of membrane (GO:0016021);; Biological Process: lignin catabolic process (GO:0046274);; Cellular Component: apoplast (GO:0048046);; Molecular Func…	K05909|0.0e+00|gmx:100810993|K05909 laccase [EC:1.10.3.2] | (RefSeq) laccase-17	--	[Q]	Secondary metabolites biosynthesis, transport and catabolism	Multicopper oxidase	Laccase-17 OS=Arabidopsis thaliana OX=3702 GN=LAC17 PE=2 SV=1	Q	Secondary metabolites biosynthesis, transport and catabolism	laccase-17 [Glycine max]
Glyma.13G244800.Wm82.a2.v1	7.47231	2.11841	9.74011e-16	-1.77107	down	--	--	--	--	--	--	--	--	--	S	Function unknown	uncharacterized protein LOC100499725 precursor [Glycine max]
Glyma.03G131600.Wm82.a2.v1	5.69367	11.3517	4.01958e-06	1.02664	up	--	--	--	--	--	--	--	--	--	--	--	uncharacterized protein LOC100793368 [Glycine max]
Glyma.15G084900.Wm82.a2.v1	10.8708	3.17664	1.71216e-12	-1.72728	down	--	--	--	--	--	--	--	--	--	--	--	hypothetical protein GLYMA_15G084900 [Glycine max]
Glyma.03G130900.Wm82.a2.v1	17.631	8.58071	2.98152e-08	-1.00217	down	[R]	General function prediction only	Molecular Function: triglyceride lipase activity (GO:0004806);; Biological Process: lipid catabolic process (GO:0016042);;	K14674|0.0e+00|gmx:100791261|K14674 TAG lipase / steryl ester hydrolase / phospholipase A2 / LPA acyltransferase [EC:3.1.1.3 3.1.1.13 3.1.1.4 2.3.1.51] | (RefSeq) triacylglycerol lipase SDP1	Steroid biosynthesis (ko00100);; Glycerolipid metabolism (ko00561);; Glycerophospholipid metabolism (ko00564);; Ether lipid metabolism (ko00565);; Arachidonic acid metabolism (ko00590);; Linoleic acid metabolism (ko00591);; alpha-Linolenic acid metabolism (ko00592)	[R]	General function prediction only	Domain of unknown function (DUF3336)	Triacylglycerol lipase SDP1 OS=Arabidopsis thaliana OX=3702 GN=SDP1 PE=1 SV=1	I	Lipid transport and metabolism	triacylglycerol lipase SDP1 [Glycine max]
Glyma.10G233700.Wm82.a2.v1	1.22061	0.363253	7.80182e-09	-1.69288	down	--	--	Biological Process: lipid catabolic process (GO:0016042);;	K23408|1.5e-11|obr:102713458|K23408 cell division cycle-associated protein 7 | (RefSeq) cell division cycle-associated protein 7-like	--	[IOT]	Lipid transport and metabolism;; Posttranslational modification, protein turnover, chaperones;; Signal transduction mechanisms	Lipase (class 3)	--	--	--	uncharacterized protein LOC100800742 [Glycine max]
Glyma.05G224400.Wm82.a2.v1	15.8167	4.43189	6.23369e-33	-1.80385	down	--	--	Molecular Function: metal ion binding (GO:0046872);;	K23048|6.2e-69|gmx:100786368|K23048 RING finger protein unkempt | (RefSeq) zinc finger CCCH domain-containing protein	--	[R]	General function prediction only	Zinc finger C-x8-C-x5-C-x3-H type (and similar)	Zinc finger CCCH domain-containing protein 20 OS=Arabidopsis thaliana OX=3702 GN=At2g19810 PE=2 SV=1	S	Function unknown	C3H-type zinc finger protein [Glycine max]
Glyma.15G146400.Wm82.a2.v1	11.7745	1.49659	2.50821e-34	-2.91989	down	--	--	Molecular Function: protein phosphatase inhibitor activity (GO:0004864);; Cellular Component: nucleus (GO:0005634);; Cellular Component: cytoplasm (GO:0005737);; Biological Process: defense response (GO:0006952);; Biological Process: abscisic acid-activated signaling pathway (GO:0009738);; Molecular Function: abscisic acid binding (GO:0010427);; Molecular Function: signaling receptor activity (GO…	--	--	--	--	Pathogenesis-related protein Bet v 1 family	Major allergen Pru ar 1 OS=Prunus armeniaca OX=36596 PE=1 SV=1	S	Function unknown	MLP-like protein 34 [Glycine max]
Glyma.02G039000.Wm82.a2.v1	43.4854	12.0989	4.22546e-32	-1.78148	down	--	--	Molecular Function: protein binding (GO:0005515);;	--	--	--	--	PB1 domain	--	S	Function unknown	uncharacterized protein LOC100815157 [Glycine max]
Glyma.12G112100.Wm82.a2.v1	28.5772	8.33776	3.00116e-10	-1.74009	down	--	--	--	--	--	--	--	--	--	--	--	hypothetical protein GLYMA_12G112100 [Glycine max]
Glyma.01G106700.Wm82.a2.v1	13.312	3.23994	2.303e-26	-1.99067	down	--	--	Molecular Function: copper ion transmembrane transporter activity (GO:0005375);; Cellular Component: plasma membrane (GO:0005886);; Biological Process: cellular copper ion homeostasis (GO:0006878);; Cellular Component: integral component of membrane (GO:0016021);;	K14686|1.5e-74|gmx:100808693|K14686 solute carrier family 31 (copper transporter), member 1 | (RefSeq) copper transporter 2	--	[P]	Inorganic ion transport and metabolism	Ctr copper transporter family	Copper transporter 2 OS=Arabidopsis thaliana OX=3702 GN=COPT2 PE=2 SV=1	P	Inorganic ion transport and metabolism	copper transporter 2 [Glycine max]
Glyma.17G092800.Wm82.a2.v1	4.69505	0.761293	0.00557929	-2.56601	down	--	--	--	K03860|2.2e-07|nnu:104608881|K03860 phosphatidylinositol N-acetylglucosaminyltransferase subunit Q | (RefSeq) N-acetylglucosaminyl-phosphatidylinositol biosynthetic protein gpi1-like	Glycosylphosphatidylinositol (GPI)-anchor biosynthesis (ko00563)	--	--	Gibberellin regulated protein	Snakin-2 OS=Solanum tuberosum OX=4113 GN=SN2 PE=1 SV=1	S	Function unknown	gibberellin-regulated protein 26 precursor [Glycine max]
Glyma.17G164800.Wm82.a2.v1	2.94886	7.49101	0.000402222	1.36292	up	--	--	Biological Process: reproduction (GO:0000003);; Biological Process: developmental process involved in reproduction (GO:0003006);; Cellular Component: cellular_component (GO:0005575);; Cellular Component: cell (GO:0005623);; Cellular Component: plasma membrane (GO:0005886);; Biological Process: cell cycle (GO:0007049);; Biological Process: multicellular organism development (GO:0007275);; Biologic…	--	--	--	--	--	--	S	Function unknown	hypothetical protein GLYMA_17G164800, partial [Glycine max]
Glyma.16G142300.Wm82.a2.v1	2.27423	5.39524	8.94871e-08	1.27969	up	--	--	Cellular Component: integral component of membrane (GO:0016021);;	K23678|9.2e-220|gmx:100787660|K23678 solute carrier family 66 (lysosomal lysine-arginine transporter), member 1 | (RefSeq) lysosomal amino acid transporter 1	--	[S]	Function unknown	PQ loop repeat	--	S	Function unknown	lysosomal amino acid transporter 1 [Glycine max]
Glyma.01G129400.Wm82.a2.v1	28.3127	5.91005	7.80207e-15	-2.21404	down	[E]	Amino acid transport and metabolism	Molecular Function: transaminase activity (GO:0008483);; Molecular Function: pyridoxal phosphate binding (GO:0030170);;	K00827|2.4e-278|gmx:100170733|K00827 alanine-glyoxylate transaminase / (R)-3-amino-2-methylpropionate-pyruvate transaminase [EC:2.6.1.44 2.6.1.40] | (RefSeq) alanine--glyoxylate aminotransferase 2 homolog 2, mitochondrial	Alanine, aspartate and glutamate metabolism (ko00250);; Glycine, serine and threonine metabolism (ko00260);; Cysteine and methionine metabolism (ko00270);; Valine, leucine and isoleucine degradation (ko00280)	[E]	Amino acid transport and metabolism	Aminotransferase class-III	Alanine--glyoxylate aminotransferase 2 homolog 2, mitochondrial OS=Arabidopsis thaliana OX=3702 GN=AGT3 PE=1 SV=2	E	Amino acid transport and metabolism	alanine--glyoxylate aminotransferase 2 homolog 2, mitochondrial [Glycine max]
Glyma.07G155200.Wm82.a2.v1	5.411	14.949	1.55373e-11	1.50981	up	[P]	Inorganic ion transport and metabolism	Molecular Function: ferroxidase activity (GO:0004322);; Molecular Function: iron ion binding (GO:0005506);; Cellular Component: cytoplasm (GO:0005737);; Biological Process: iron ion transport (GO:0006826);; Biological Process: intracellular sequestering of iron ion (GO:0006880);; Molecular Function: ferrous iron binding (GO:0008198);; Molecular Function: ferric iron binding (GO:0008199);;	K00522|3.2e-136|gmx:547698|K00522 ferritin heavy chain [EC:1.16.3.2] | (RefSeq) ferritin	--	[P]	Inorganic ion transport and metabolism	Ferritin-like domain	Ferritin, chloroplastic OS=Malus baccata var. xiaojinensis OX=141206 PE=3 SV=1	P	Inorganic ion transport and metabolism	ferritin [Glycine max]
Glyma.09G039800.Wm82.a2.v1	1.69389	4.91469	5.85202e-05	1.55221	up	--	--	--	--	--	--	--	--	--	--	--	extensin-2 [Glycine max]
Glyma.18G017400.Wm82.a2.v1	1.18576	2.35502	0.000254352	1.02352	up	--	--	--	--	--	--	--	Protein of unknown function (DUF4057)	--	S	Function unknown	uncharacterized protein LOC100804656 [Glycine max]
Glyma.06G050500.Wm82.a2.v1	1.65118	3.49264	0.000779836	1.11602	up	--	--	Cellular Component: integral component of membrane (GO:0016021);;	--	--	--	--	--	--	--	--	hypothetical protein GLYMA_06G050500 [Glycine max]
Glyma.02G255800.Wm82.a2.v1	0.310082	1.56567	4.74394e-10	2.3755	up	--	--	Biological Process: amino acid transmembrane transport (GO:0003333);; Cellular Component: plasma membrane (GO:0005886);; Molecular Function: amino acid transmembrane transporter activity (GO:0015171);; Cellular Component: integral component of membrane (GO:0016021);;	K13946|3.5e-280|gmx:100778259|K13946 auxin influx carrier (AUX1 LAX family) | (RefSeq) GMLAX2; auxin transporter-like protein 1 isoform X1	Plant hormone signal transduction (ko04075)	[E]	Amino acid transport and metabolism	Transmembrane amino acid transporter protein	Auxin transporter-like protein 1 OS=Medicago truncatula OX=3880 GN=LAX1 PE=2 SV=1	E	Amino acid transport and metabolism	auxin transporter-like protein 1 isoform X1 [Glycine max]
Glyma.12G186800.Wm82.a2.v1	4.57102	1.50376	0.000128926	-1.54693	down	--	--	Cellular Component: integral component of membrane (GO:0016021);;	--	--	--	--	--	F-box protein At2g27310 OS=Arabidopsis thaliana OX=3702 GN=At2g27310 PE=2 SV=1	S	Function unknown	F-box protein At2g27310 [Glycine max]
Glyma.02G307400.Wm82.a2.v1	12.3767	5.92684	1.75902e-08	-1.03085	down	--	--	--	K22374|3.9e-50|aip:107609107|K22374 3''-deamino-3''-oxonicotianamine reductase [EC:1.1.1.285] | (RefSeq) NAD(P)H-dependent 6'-deoxychalcone synthase isoform X1	--	--	--	--	--	--	--	uncharacterized protein LOC100306425 [Glycine max]
Glyma.07G169400.Wm82.a2.v1	1.18841	4.02041	1.49459e-08	1.7785	up	--	--	--	--	--	--	--	--	--	--	--	uncharacterized protein LOC100814563 isoform X1 [Glycine max]
Glyma.06G013300.Wm82.a2.v1	5.40416	2.12762	0.00493658	-1.30735	down	--	--	--	--	--	--	--	Organ specific protein	Organ-specific protein S2 OS=Pisum sativum OX=3888 PE=2 SV=1	O	Posttranslational modification, protein turnover, chaperones	uncharacterized protein LOC100787789 precursor [Glycine max]
Glyma.07G004200.Wm82.a2.v1	3.36227	6.94874	5.02079e-14	1.08265	up	--	--	Biological Process: fucose metabolic process (GO:0006004);; Cellular Component: integral component of membrane (GO:0016021);; Molecular Function: transferase activity, transferring glycosyl groups (GO:0016757);;	K23280|2.1e-20|aof:109841559|K23280 rhamnogalacturonan I rhamnosyltransferase [EC:2.4.1.351] | (RefSeq) uncharacterized protein At1g04910-like	--	--	--	GDP-fucose protein O-fucosyltransferase	Protein MANNAN SYNTHESIS-RELATED 1 OS=Arabidopsis thaliana OX=3702 GN=MSR1 PE=2 SV=1	G	Carbohydrate transport and metabolism	protein MANNAN SYNTHESIS-RELATED 1 [Glycine max]
Glyma.08G069600.Wm82.a2.v1	9.75742	4.02118	7.04167e-12	-1.23765	down	--	--	--	--	--	--	--	--	--	--	--	hypothetical protein GLYMA_08G069600 [Glycine max]
Glyma.14G005700.Wm82.a2.v1	24.6071	54.1872	8.8903e-15	1.17232	up	[Q]	Secondary metabolites biosynthesis, transport and catabolism	Molecular Function: alditol:NADP+ 1-oxidoreductase activity (GO:0004032);; Cellular Component: cytosol (GO:0005829);; Molecular Function: alcohol dehydrogenase (NADP+) activity (GO:0008106);; Molecular Function: oxidoreductase activity (GO:0016491);;	K08243|3.2e-167|gmx:547911|K08243 polyketide reductase | (RefSeq) GMCHR; NAD(P)H-dependent 6'-deoxychalcone synthase	Flavonoid biosynthesis (ko00941)	[R]	General function prediction only	Aldo/keto reductase family	NAD(P)H-dependent 6'-deoxychalcone synthase OS=Glycine max OX=3847 PE=1 SV=1	S	Function unknown	hypothetical protein GLYMA_14G005700 [Glycine max]
Glyma.12G030900.Wm82.a2.v1	0.73243	0.12995	4.80288e-09	-2.42148	down	--	--	Biological Process: amino acid transmembrane transport (GO:0003333);; Cellular Component: plasma membrane (GO:0005886);; Molecular Function: amino acid transmembrane transporter activity (GO:0015171);; Cellular Component: integral component of membrane (GO:0016021);;	K13946|2.8e-290|gmx:100812002|K13946 auxin influx carrier (AUX1 LAX family) | (RefSeq) GMLAX12; auxin transporter-like protein 5	Plant hormone signal transduction (ko04075)	[E]	Amino acid transport and metabolism	Transmembrane amino acid transporter protein	Auxin transporter-like protein 5 OS=Medicago truncatula OX=3880 GN=LAX5 PE=2 SV=1	E	Amino acid transport and metabolism	auxin transporter-like protein 5 [Glycine max]
Glyma.14G055200.Wm82.a2.v1	80.8164	36.9208	6.69662e-14	-1.09408	down	--	--	--	--	--	--	--	--	Protein EARLY RESPONSIVE TO DEHYDRATION 15 OS=Glycine max OX=3847 GN=ERD15 PE=2 SV=1	S	Function unknown	protein EARLY RESPONSIVE TO DEHYDRATION 15 [Glycine max]
Glyma.11G098400.Wm82.a2.v1	74.008	209.797	6.44055e-12	1.53862	up	--	--	Cellular Component: integral component of membrane (GO:0016021);;	--	--	--	--	--	--	--	--	hypothetical protein GLYMA_11G098400 [Glycine max]
Glyma.03G181700.Wm82.a2.v1	10.132	20.3762	3.66602e-11	1.04349	up	[E]	Amino acid transport and metabolism	Cellular Component: cytoplasm (GO:0005737);; Biological Process: L-phenylalanine catabolic process (GO:0006559);; Biological Process: cinnamic acid biosynthetic process (GO:0009800);; Molecular Function: ammonia-lyase activity (GO:0016841);; Molecular Function: phenylalanine ammonia-lyase activity (GO:0045548);;	K10775|0.0e+00|gmx:100788438|K10775 phenylalanine ammonia-lyase [EC:4.3.1.24] | (RefSeq) GMPAL1.2; phenylalanine ammonia-lyase 1	Phenylalanine metabolism (ko00360);; Phenylpropanoid biosynthesis (ko00940)	[Q]	Secondary metabolites biosynthesis, transport and catabolism	Aromatic amino acid lyase	Phenylalanine ammonia-lyase 1 OS=Glycine max OX=3847 GN=PAL1 PE=3 SV=1	Q	Secondary metabolites biosynthesis, transport and catabolism	phenylalanine ammonia-lyase 1 [Glycine max]
Glyma.15G211300.Wm82.a2.v1	4.84825	1.19585	1.18356e-11	-1.97637	down	[IQR]	Lipid transport and metabolism;; Secondary metabolites biosynthesis, transport and catabolism;; General function prediction only	Molecular Function: oxidoreductase activity (GO:0016491);;	K13070|2.5e-78|dosa:Os04t0179200-01|K13070 momilactone-A synthase [EC:1.1.1.295] | (RefSeq) Os04g0179200, MAS, MOMILACTONE_A_SYNTHASE; Similar to Stem secoisolariciresinol dehydrogenase (Fragment).	Diterpenoid biosynthesis (ko00904)	[R]	General function prediction only	Enoyl-(Acyl carrier protein) reductase	Momilactone A synthase OS=Oryza sativa subsp. japonica OX=39947 GN=Os04g0179200 PE=2 SV=1	Q	Secondary metabolites biosynthesis, transport and catabolism	momilactone A synthase [Glycine max]
Glyma.08G232200.Wm82.a2.v1	4.77763	1.46329	4.18113e-09	-1.67228	down	--	--	--	--	--	--	--	--	--	--	--	uncharacterized protein LOC102668800 [Glycine max]
Glyma.09G211600.Wm82.a2.v1	0.535538	2.03101	6.81961e-06	1.91571	up	[R]	General function prediction only	--	K21568|1.4e-178|gmx:100780465|K21568 pinoresinol/lariciresinol reductase [EC:1.23.1.1 1.23.1.2 1.23.1.3 1.23.1.4] | (RefSeq) uncharacterized protein LOC100780465	Biosynthesis of various secondary metabolites - part 2 (ko00998)	--	--	NmrA-like family	Bifunctional pinoresinol-lariciresinol reductase 2 OS=Linum usitatissimum OX=4006 GN=PLR_Lu2 PE=1 SV=1	S	Function unknown	uncharacterized protein LOC100780465 [Glycine max]
Glyma.15G115200.Wm82.a2.v1	6.42067	1.6268	3.35346e-22	-1.9383	down	[G]	Carbohydrate transport and metabolism	Cellular Component: integral component of membrane (GO:0016021);; Molecular Function: transmembrane transporter activity (GO:0022857);; Biological Process: anion transmembrane transport (GO:0098656);;	K14445|1.1e-306|gmx:100808680|K14445 solute carrier family 13 (sodium-dependent dicarboxylate transporter), member 2/3/5 | (RefSeq) tonoplast dicarboxylate transporter	--	[P]	Inorganic ion transport and metabolism	Sodium:sulfate symporter transmembrane region	Tonoplast dicarboxylate transporter OS=Arabidopsis thaliana OX=3702 GN=TDT PE=2 SV=2	P	Inorganic ion transport and metabolism	tonoplast dicarboxylate transporter [Glycine max]
Glyma.06G272900.Wm82.a2.v1	0.696568	1.94752	0.000101067	1.49376	up	[O]	Posttranslational modification, protein turnover, chaperones	Molecular Function: cysteine-type endopeptidase activity (GO:0004197);; Cellular Component: extracellular space (GO:0005615);; Cellular Component: lysosome (GO:0005764);; Biological Process: proteolysis involved in cellular protein catabolic process (GO:0051603);;	K16292|4.5e-72|lang:109332554|K16292 KDEL-tailed cysteine endopeptidase [EC:3.4.22.-] | (RefSeq) senescence-specific cysteine protease SAG39-like	--	[O]	Posttranslational modification, protein turnover, chaperones	Papain family cysteine protease	KDEL-tailed cysteine endopeptidase CEP1 OS=Arabidopsis thaliana OX=3702 GN=CEP1 PE=1 SV=1	O	Posttranslational modification, protein turnover, chaperones	hypothetical protein GLYMA_06G272900 [Glycine max]
Glyma.08G101500.Wm82.a2.v1	1.77405	3.61382	3.23317e-07	1.05449	up	[V]	Defense mechanisms	Cellular Component: plant-type vacuole (GO:0000325);; Molecular Function: ATP binding (GO:0005524);; Cellular Component: vacuolar membrane (GO:0005774);; Cellular Component: membrane (GO:0016020);; Cellular Component: integral component of membrane (GO:0016021);; Molecular Function: ATPase activity (GO:0016887);; Molecular Function: ATPase activity, coupled to transmembrane movement of substances…	K05666|0.0e+00|cit:102618233|K05666 ATP-binding cassette, subfamily C (CFTR/MRP), member 2 | (RefSeq) ABC transporter C family member 3-like isoform X1	ABC transporters (ko02010)	[Q]	Secondary metabolites biosynthesis, transport and catabolism	ABC transporter	ABC transporter C family member 3 OS=Arabidopsis thaliana OX=3702 GN=ABCC3 PE=1 SV=1	Q	Secondary metabolites biosynthesis, transport and catabolism	putative ABC transporter C family member 15 [Glycine max]
Glyma.12G080800.Wm82.a2.v1	0.491966	1.16457	0.000245251	1.27011	up	--	--	--	--	--	--	--	Protein of unknown function (DUF1635)	--	S	Function unknown	uncharacterized protein LOC100782615 [Glycine max]
Glyma.02G042700.Wm82.a2.v1	1.94938	0.477612	0.000276661	-1.95721	down	--	--	--	--	--	--	--	Arabidopsis protein of unknown function	--	S	Function unknown	uncharacterized protein LOC100811784 [Glycine max]
Glyma.16G049000.Wm82.a2.v1	263.768	67.1488	9.29213e-43	-1.91987	down	--	--	Cellular Component: chloroplast (GO:0009507);;	K12198|4.4e-23|sita:101765827|K12198 charged multivesicular body protein 5 | (RefSeq) vacuolar protein sorting-associated protein 60.1	Endocytosis (ko04144)	--	--	Light regulated protein Lir1	Light-regulated protein 1, chloroplastic OS=Arabidopsis thaliana OX=3702 GN=LIR1 PE=1 SV=1	S	Function unknown	putative light-regulated protein 1 [Glycine max]
Glyma.02G213700.Wm82.a2.v1	113.814	31.7771	4.46705e-16	-1.75501	down	[P]	Inorganic ion transport and metabolism	Molecular Function: carbonate dehydratase activity (GO:0004089);; Molecular Function: zinc ion binding (GO:0008270);; Biological Process: cyanate catabolic process (GO:0009440);; Biological Process: carbon utilization (GO:0015976);;	K01673|2.5e-186|gmx:100812124|K01673 carbonic anhydrase [EC:4.2.1.1] | (RefSeq) uncharacterized protein LOC100812124	Nitrogen metabolism (ko00910)	[P]	Inorganic ion transport and metabolism	Carbonic anhydrase	Beta carbonic anhydrase 5, chloroplastic OS=Arabidopsis thaliana OX=3702 GN=BCA5 PE=2 SV=1	P	Inorganic ion transport and metabolism	beta carbonic anhydrase 5, chloroplastic-like [Glycine soja]
Glyma.06G213000.Wm82.a2.v1	0.36213	0.752551	0.00198424	1.07242	up	--	--	Molecular Function: ubiquitin-protein transferase activity (GO:0004842);; Biological Process: SCF-dependent proteasomal ubiquitin-dependent protein catabolic process (GO:0031146);;	--	--	--	--	F-box domain	--	--	--	uncharacterized protein LOC100815083 [Glycine max]
Glyma.11G216400.Wm82.a2.v1	6.44219	12.8143	4.04267e-08	1.02693	up	[O]	Posttranslational modification, protein turnover, chaperones	Biological Process: protein glutathionylation (GO:0010731);; Molecular Function: transferase activity (GO:0016740);; Molecular Function: glutathione dehydrogenase (ascorbate) activity (GO:0045174);;	K21888|6.0e-146|gmx:100805216|K21888 glutathione dehydrogenase/transferase [EC:1.8.5.1 2.5.1.18] | (RefSeq) glutathione S-transferase DHAR3, chloroplastic	Ascorbate and aldarate metabolism (ko00053);; Glutathione metabolism (ko00480)	[P]	Inorganic ion transport and metabolism	Glutathione S-transferase, N-terminal domain	Glutathione S-transferase DHAR3, chloroplastic OS=Arabidopsis thaliana OX=3702 GN=DHAR3 PE=1 SV=1	P	Inorganic ion transport and metabolism	glutathione S-transferase DHAR3, chloroplastic [Glycine max]
Glyma.08G334700.Wm82.a2.v1	1.74502	4.86718	8.26515e-13	1.51682	up	--	--	Biological Process: response to red or far red light (GO:0009639);; Biological Process: negative gravitropism (GO:0009959);;	--	--	--	--	Plant protein of unknown function (DUF641)	Protein GRAVITROPIC IN THE LIGHT 1 OS=Arabidopsis thaliana OX=3702 GN=GIL1 PE=1 SV=1	S	Function unknown	protein GRAVITROPIC IN THE LIGHT 1 [Glycine max]
Glyma.16G053000.Wm82.a2.v1	0.540633	3.28202	7.37416e-27	2.6304	up	--	--	Molecular Function: transcription factor activity, sequence-specific DNA binding (GO:0003700);; Cellular Component: nucleus (GO:0005634);; Biological Process: regulation of transcription, DNA-templated (GO:0006355);; Molecular Function: sequence-specific DNA binding (GO:0043565);;	K14494|1.4e-85|var:108340908|K14494 DELLA protein | (RefSeq) DELLA protein GAI-like	Plant hormone signal transduction (ko04075)	--	--	GRAS domain family	GRAS family protein RAM1 OS=Lotus japonicus OX=34305 GN=RAM1 PE=1 SV=1	K	Transcription	DELLA protein RGL1 [Glycine max]
Glyma.02G128400.Wm82.a2.v1	7.56019	3.60833	2.90851e-10	-1.03289	down	--	--	Molecular Function: molecular_function (GO:0003674);; Molecular Function: catalytic activity (GO:0003824);; Molecular Function: ubiquitin-protein transferase activity (GO:0004842);; Biological Process: cellular protein modification process (GO:0006464);; Biological Process: proteolysis (GO:0006508);; Biological Process: ubiquitin-dependent protein catabolic process (GO:0006511);; Biological Proce…	--	--	--	--	F-box-like	F-box protein DOR OS=Arabidopsis thaliana OX=3702 GN=DOR PE=1 SV=2	S	Function unknown	putative F-box protein At1g32420 isoform X1 [Glycine max]
Glyma.11G080300.Wm82.a2.v1	1.81932	5.71891	2.35861e-08	1.68569	up	--	--	Molecular Function: peroxidase activity (GO:0004601);; Cellular Component: extracellular region (GO:0005576);; Biological Process: response to oxidative stress (GO:0006979);; Cellular Component: plant-type cell wall (GO:0009505);; Cellular Component: plasmodesma (GO:0009506);; Molecular Function: heme binding (GO:0020037);; Biological Process: hydrogen peroxide catabolic process (GO:0042744);; Mo…	K00430|1.8e-176|gmx:102665908|K00430 peroxidase [EC:1.11.1.7] | (RefSeq) peroxidase 64-like precursor	Phenylpropanoid biosynthesis (ko00940)	--	--	Peroxidase	Peroxidase 64 OS=Arabidopsis thaliana OX=3702 GN=PER64 PE=1 SV=1	Q	Secondary metabolites biosynthesis, transport and catabolism	peroxidase sEPb2 precursor [Glycine max]
Glyma.13G113100.Wm82.a2.v1	1.34131	3.94044	5.0542e-09	1.57633	up	[P]	Inorganic ion transport and metabolism	Molecular Function: N,N-dimethylaniline monooxygenase activity (GO:0004499);; Molecular Function: flavin adenine dinucleotide binding (GO:0050660);; Molecular Function: NADP binding (GO:0050661);;	K11816|7.5e-23|mtr:MTR_1g069275|K11816 indole-3-pyruvate monooxygenase [EC:1.14.13.168] | (RefSeq) indole-3-pyruvate monooxygenase	Tryptophan metabolism (ko00380)	[Q]	Secondary metabolites biosynthesis, transport and catabolism	Flavin-binding monooxygenase-like	Probable flavin-containing monooxygenase 1 OS=Arabidopsis thaliana OX=3702 GN=FMO1 PE=2 SV=1	Q	Secondary metabolites biosynthesis, transport and catabolism	probable flavin-containing monooxygenase 1 [Glycine max]
Glyma.10G074600.Wm82.a2.v1	8.61498	3.35248	4.03064e-12	-1.32821	down	--	--	--	--	--	--	--	--	--	--	--	uncharacterized protein LOC102662021 [Glycine max]
Glycine_max_newGene_5352	0.556114	1.34116	2.82927e-12	1.29584	up	--	--	Cellular Component: integral component of membrane (GO:0016021);;	--	--	--	--	--	--	L	Replication, recombination and repair	uncharacterized protein LOC102667665 [Glycine max]
Glyma.20G061600.Wm82.a2.v1	0.707944	0.306299	0.00200709	-1.10622	down	--	--	Biological Process: vegetative to reproductive phase transition of meristem (GO:0010228);; Cellular Component: integral component of membrane (GO:0016021);;	--	--	--	--	--	Uncharacterized membrane protein At3g27390 OS=Arabidopsis thaliana OX=3702 GN=At3g27390 PE=1 SV=2	S	Function unknown	uncharacterized membrane protein At3g27390 isoform X3 [Glycine max]
Glyma.06G034600.Wm82.a2.v1	1.58186	3.81654	2.82927e-12	1.29824	up	[M]	Cell wall/membrane/envelope biogenesis	Cellular Component: Golgi apparatus (GO:0005794);; Molecular Function: transferase activity, transferring glycosyl groups (GO:0016757);;	K20893|8.3e-210|gmx:100818099|K20893 probable galacturonosyltransferase-like 1 [EC:2.4.1.-] | (RefSeq) probable galacturonosyltransferase-like 1	--	--	--	Glycosyl transferase family 8	Probable galacturonosyltransferase-like 1 OS=Arabidopsis thaliana OX=3702 GN=GATL1 PE=2 SV=1	G	Carbohydrate transport and metabolism	probable galacturonosyltransferase-like 1 [Glycine max]
Glyma.10G010100.Wm82.a2.v1	25.1054	81.7467	4.84554e-16	1.7458	up	--	--	Biological Process: regulation of systemic acquired resistance (GO:0010112);;	--	--	--	--	NPR1 interacting	--	--	--	putative NIM1-interacting family protein [Glycine max]
Glycine_max_newGene_4798	0.612842	0.0957123	5.70864e-10	-2.34421	down	--	--	Cellular Component: integral component of membrane (GO:0016021);;	K21989|1.1e-49|cam:101503032|K21989 calcium permeable stress-gated cation channel | (RefSeq) CSC1-like protein At1g32090	--	[R]	General function prediction only	Calcium-dependent channel, 7TM region, putative phosphate	CSC1-like protein At1g32090 OS=Arabidopsis thaliana OX=3702 GN=At1g32090 PE=1 SV=1	S	Function unknown	CSC1-like protein At1g32090 [Glycine soja]
Glyma.04G190900.Wm82.a2.v1	5.50189	2.50671	1.45683e-06	-1.10388	down	--	--	Molecular Function: transcription cofactor activity (GO:0003712);; Molecular Function: histone acetyltransferase activity (GO:0004402);; Biological Process: regulation of transcription, DNA-templated (GO:0006355);; Molecular Function: zinc ion binding (GO:0008270);; Molecular Function: oxidoreductase activity (GO:0016491);; Cellular Component: host cell nucleus (GO:0042025);;	K10523|3.7e-07|ats:109785935|K10523 speckle-type POZ protein | (RefSeq) LOC109785935; BTB/POZ and MATH domain-containing protein 2-like	--	[K]	Transcription	TAZ zinc finger	BTB/POZ and TAZ domain-containing protein 2 OS=Arabidopsis thaliana OX=3702 GN=BT2 PE=1 SV=1	K	Transcription	BTB/POZ and TAZ domain-containing protein 1 isoform X1 [Glycine max]
Glyma.18G094600.Wm82.a2.v1	4.74677	0.390533	2.85421e-12	-3.59743	down	[O]	Posttranslational modification, protein turnover, chaperones	--	K13993|2.1e-126|gmx:100788249|K13993 HSP20 family protein | (RefSeq) small heat shock protein, chloroplastic	Protein processing in endoplasmic reticulum (ko04141)	[O]	Posttranslational modification, protein turnover, chaperones	Hsp20/alpha crystallin family	Heat shock protein 21, chloroplastic OS=Arabidopsis thaliana OX=3702 GN=HSP21 PE=1 SV=1	O	Posttranslational modification, protein turnover, chaperones	small heat shock protein, chloroplastic [Glycine max]
Glyma.08G145900.Wm82.a2.v1	23.4876	8.74655	4.69083e-23	-1.38242	down	[G]	Carbohydrate transport and metabolism	Molecular Function: zinc ion binding (GO:0008270);; Molecular Function: oxidoreductase activity, acting on the CH-OH group of donors, NAD or NADP as acceptor (GO:0016616);;	K00083|4.1e-169|dcr:108215375|K00083 cinnamyl-alcohol dehydrogenase [EC:1.1.1.195] | (RefSeq) probable mannitol dehydrogenase	Phenylpropanoid biosynthesis (ko00940)	[Q]	Secondary metabolites biosynthesis, transport and catabolism	Alcohol dehydrogenase GroES-like domain	Probable mannitol dehydrogenase OS=Medicago sativa OX=3879 GN=CAD1 PE=1 SV=1	Q	Secondary metabolites biosynthesis, transport and catabolism	uncharacterized protein LOC100795575 [Glycine max]
Glyma.15G158900.Wm82.a2.v1	40.0777	13.7482	4.52942e-34	-1.50612	down	[O]	Posttranslational modification, protein turnover, chaperones	Molecular Function: metalloendopeptidase activity (GO:0004222);; Molecular Function: ATP binding (GO:0005524);; Molecular Function: zinc ion binding (GO:0008270);; Cellular Component: integral component of membrane (GO:0016021);;	K03798|0.0e+00|gmx:100795567|K03798 cell division protease FtsH [EC:3.4.24.-] | (RefSeq) FTSH9; ATP-dependent zinc metalloprotease FTSH 8, chloroplastic-like	--	[O]	Posttranslational modification, protein turnover, chaperones	Peptidase family M41	ATP-dependent zinc metalloprotease FTSH 2, chloroplastic OS=Oryza sativa subsp. japonica OX=39947 GN=FTSH2 PE=3 SV=1	O	Posttranslational modification, protein turnover, chaperones	ATP-dependent zinc metalloprotease FTSH 8, chloroplastic-like [Glycine max]
Glyma.11G003100.Wm82.a2.v1	0.765491	0.316253	0.00232947	-1.18919	down	--	--	Cellular Component: integral component of membrane (GO:0016021);;	--	--	--	--	--	--	S	Function unknown	uncharacterized protein LOC100799187 isoform X1 [Glycine max]
Glyma.15G026500.Wm82.a2.v1	144.943	387.266	1.40031e-31	1.45423	up	--	--	Molecular Function: oxidoreductase activity, acting on single donors with incorporation of molecular oxygen, incorporation of two atoms of oxygen (GO:0016702);; Biological Process: oxylipin biosynthetic process (GO:0031408);; Biological Process: lipid oxidation (GO:0034440);; Molecular Function: metal ion binding (GO:0046872);;	K15718|0.0e+00|gmx:100101853|K15718 linoleate 9S-lipoxygenase [EC:1.13.11.58] | (RefSeq) VLXB; lipoxygenase L-5	Linoleic acid metabolism (ko00591)	--	--	Lipoxygenase	Linoleate 9S-lipoxygenase-4 OS=Glycine max OX=3847 GN=LOX1.5 PE=1 SV=1	E	Amino acid transport and metabolism	lipoxygenase L-5 [Glycine max]
Glyma.09G225400.Wm82.a2.v1	1.12648	4.86479	5.14055e-22	2.14033	up	[C]	Energy production and conversion	Biological Process: cytokinin metabolic process (GO:0009690);; Cellular Component: integral component of membrane (GO:0016021);; Molecular Function: cytokinin dehydrogenase activity (GO:0019139);; Molecular Function: FAD binding (GO:0071949);;	K00279|0.0e+00|gmx:100800722|K00279 cytokinin dehydrogenase [EC:1.5.99.12] | (RefSeq) cytokinin dehydrogenase 6	Zeatin biosynthesis (ko00908)	[C]	Energy production and conversion	Cytokinin dehydrogenase 1, FAD and cytokinin binding	Cytokinin dehydrogenase 6 OS=Arabidopsis thaliana OX=3702 GN=CKX6 PE=2 SV=2	C	Energy production and conversion	cytokinin dehydrogenase 6 [Glycine max]
Glyma.06G150400.Wm82.a2.v1	1.68468	0.511554	0.00151114	-1.67135	down	--	--	Cellular Component: integral component of membrane (GO:0016021);;	K19040|6.3e-126|gmx:100807227|K19040 E3 ubiquitin-protein ligase ATL10/75/76/77/78 [EC:2.3.2.27] | (RefSeq) RING-H2 finger protein ATL78-like	--	[O]	Posttranslational modification, protein turnover, chaperones	Ring finger domain	RING-H2 finger protein ATL78 OS=Arabidopsis thaliana OX=3702 GN=ATL78 PE=2 SV=1	O	Posttranslational modification, protein turnover, chaperones	RING-H2 finger protein ATL78-like [Glycine max]
Glyma.08G110000.Wm82.a2.v1	0.644316	2.86518	2.49353e-15	2.17181	up	--	--	Molecular Function: transferase activity, transferring acyl groups other than amino-acyl groups (GO:0016747);;	K13065|5.3e-22|dcr:108223132|K13065 shikimate O-hydroxycinnamoyltransferase [EC:2.3.1.133] | (RefSeq) shikimate O-hydroxycinnamoyltransferase-like	Phenylpropanoid biosynthesis (ko00940);; Flavonoid biosynthesis (ko00941);; Stilbenoid, diarylheptanoid and gingerol biosynthesis (ko00945)	--	--	Transferase family	Protein ECERIFERUM 26 OS=Arabidopsis thaliana OX=3702 GN=CER26 PE=2 SV=1	S	Function unknown	protein ECERIFERUM 26 [Glycine max]
Glyma.19G057300.Wm82.a2.v1	0.417832	1.13289	1.00903e-05	1.45129	up	[QV]	Secondary metabolites biosynthesis, transport and catabolism;; Defense mechanisms	Molecular Function: monooxygenase activity (GO:0004497);; Molecular Function: iron ion binding (GO:0005506);; Cellular Component: integral component of membrane (GO:0016021);; Molecular Function: oxidoreductase activity, acting on paired donors, with incorporation or reduction of molecular oxygen (GO:0016705);; Molecular Function: heme binding (GO:0020037);;	K15405|3.9e-117|bna:106353458|K15405 midchain alkane hydroxylase | (RefSeq) alkane hydroxylase MAH1-like	Cutin, suberine and wax biosynthesis (ko00073)	[QI]	Secondary metabolites biosynthesis, transport and catabolism;; Lipid transport and metabolism	Cytochrome P450	Alkane hydroxylase MAH1 OS=Arabidopsis thaliana OX=3702 GN=CYP96A15 PE=2 SV=1	Q	Secondary metabolites biosynthesis, transport and catabolism	alkane hydroxylase MAH1 [Glycine max]
Glyma.12G233000.Wm82.a2.v1	8.08638	24.8537	6.40131e-28	1.65568	up	--		Molecular Function: protein serine/threonine kinase activity (GO:0004674);; Molecular Function: ATP binding (GO:0005524);; Cellular Component: plasma membrane (GO:0005886);; Cellular Component: integral component of membrane (GO:0016021);; Biological Process: protein autophosphorylation (GO:0046777);;	K13416|1.5e-67|lsv:111899016|K13416 brassinosteroid insensitive 1-associated receptor kinase 1 [EC:2.7.10.1 2.7.11.1] | (RefSeq) BRASSINOSTEROID INSENSITIVE 1-associated receptor kinase 1-like isoform X1	MAPK signaling pathway - plant (ko04016);; Plant hormone signal transduction (ko04075);; Plant-pathogen interaction (ko04626)	--	--	Protein tyrosine and serine/threonine kinase	Probable LRR receptor-like serine/threonine-protein kinase At1g53430 OS=Arabidopsis thaliana OX=3702 GN=At1g53430 PE=1 SV=1	T	Signal transduction mechanisms	probable LRR receptor-like serine/threonine-protein kinase At1g53430 isoform X1 [Glycine max]
Glyma.08G188500.Wm82.a2.v1	1.50081	3.06365	0.00934311	1.04898	up	[C]	Energy production and conversion	Molecular Function: electron carrier activity (GO:0009055);; Cellular Component: chloroplast (GO:0009507);; Molecular Function: metal ion binding (GO:0046872);; Molecular Function: 2 iron, 2 sulfur cluster binding (GO:0051537);;	K02639|6.4e-54|gmx:100807723|K02639 ferredoxin | (RefSeq) ferredoxin-A	Photosynthesis (ko00195)	--	--	2Fe-2S iron-sulfur cluster binding domain	Ferredoxin-1, chloroplastic OS=Pisum sativum OX=3888 GN=PETF PE=1 SV=2	C	Energy production and conversion	LOW QUALITY PROTEIN: hypothetical protein GLYMA_08G188500 [Glycine max]
Glyma.06G024100.Wm82.a2.v1	4.91061	11.4536	6.06071e-19	1.2565	up	[D]	Cell cycle control, cell division, chromosome partitioning	Molecular Function: GTPase activity (GO:0003924);; Molecular Function: structural constituent of cytoskeleton (GO:0005200);; Molecular Function: GTP binding (GO:0005525);; Cellular Component: cytoplasm (GO:0005737);; Cellular Component: microtubule (GO:0005874);; Biological Process: microtubule-based process (GO:0007017);;	K07375|3.4e-266|gmx:100819883|K07375 tubulin beta | (RefSeq) tubulin beta chain	Phagosome (ko04145)	[Z]	Cytoskeleton	Tubulin/FtsZ family, GTPase domain	Tubulin beta chain OS=Cicer arietinum OX=3827 GN=TUBB PE=2 SV=1	Z	Cytoskeleton	tubulin beta chain [Glycine max]
Glyma.01G051300.Wm82.a2.v1	40.5078	16.1036	2.42471e-21	-1.29061	down	--	--	Molecular Function: DNA binding (GO:0003677);; Cellular Component: nucleus (GO:0005634);; Biological Process: regulation of transcription, DNA-templated (GO:0006355);;	K00521|2.1e-40|cmos:111447866|K00521 ferric-chelate reductase [EC:1.16.1.7] | (RefSeq) ferric reduction oxidase 7, chloroplastic-like	--	--	--	No apical meristem (NAM) protein	NAC domain-containing protein 2 OS=Solanum lycopersicum OX=4081 GN=NAP2 PE=2 SV=1	K	Transcription	NAC domain protein NAC1 [Glycine max]
Glyma.19G180700.Wm82.a2.v1	5.04224	15.9317	2.7593e-17	1.69635	up	[R]	General function prediction only	Cellular Component: plasma membrane (GO:0005886);; Biological Process: plant-type secondary cell wall biogenesis (GO:0009834);;	--	--	--	--	Fasciclin domain	Fasciclin-like arabinogalactan protein 11 OS=Arabidopsis thaliana OX=3702 GN=FLA11 PE=2 SV=2	S	Function unknown	fasciclin-like arabinogalactan protein 11 precursor [Glycine max]
Glyma.01G007800.Wm82.a2.v1	0.197634	0.614477	0.000116914	1.63529	up	[L]	Replication, recombination and repair	Molecular Function: DNA binding (GO:0003677);; Molecular Function: chromatin binding (GO:0003682);; Molecular Function: DNA (cytosine-5-)-methyltransferase activity (GO:0003886);; Cellular Component: nucleus (GO:0005634);; Biological Process: chromatin silencing (GO:0006342);; Biological Process: zygote asymmetric cytokinesis in embryo sac (GO:0010069);; Biological Process: maintenance of DNA met…	K00558|0.0e+00|gmx:100799480|K00558 DNA (cytosine-5)-methyltransferase 1 [EC:2.1.1.37] | (RefSeq) DNA (cytosine-5)-methyltransferase CMT3	Cysteine and methionine metabolism (ko00270)	--	--	C-5 cytosine-specific DNA methylase	DNA (cytosine-5)-methyltransferase CMT3 OS=Arabidopsis thaliana OX=3702 GN=CMT3 PE=1 SV=2	B	Chromatin structure and dynamics	DNA (cytosine-5)-methyltransferase CMT3 [Glycine max]
Glyma.04G032400.Wm82.a2.v1	3.09272	1.46269	0.000940671	-1.05602	down	--	--	--	--	--	--	--	--	--	S	Function unknown	uncharacterized protein LOC100805062 [Glycine max]
Glyma.15G179500.Wm82.a2.v1	1.3159	3.33446	6.35577e-12	1.37631	up	[G]	Carbohydrate transport and metabolism	Molecular Function: polygalacturonase activity (GO:0004650);; Cellular Component: extracellular region (GO:0005576);; Biological Process: carbohydrate metabolic process (GO:0005975);; Biological Process: cell wall organization (GO:0071555);;	K01213|6.4e-32|bvg:104904583|K01213 galacturan 1,4-alpha-galacturonidase [EC:3.2.1.67] | (RefSeq) probable polygalacturonase At1g80170	Pentose and glucuronate interconversions (ko00040)	--	--	Glycosyl hydrolases family 28	Probable polygalacturonase OS=Vitis vinifera OX=29760 GN=GSVIVT00026920001 PE=1 SV=1	G	Carbohydrate transport and metabolism	probable polygalacturonase [Glycine max]
Glyma.07G002600.Wm82.a2.v1	0.478417	1.10863	0.00178717	1.24856	up	--	--	Cellular Component: integral component of membrane (GO:0016021);;	--	--	--	--	--	Uncharacterized membrane protein At1g16860 OS=Arabidopsis thaliana OX=3702 GN=At1g16860 PE=1 SV=1	S	Function unknown	putative membrane protein isoform A [Glycine soja]
Glyma.07G053100.Wm82.a2.v1	1.77453	3.55764	1.45116e-10	1.03685	up	[P]	Inorganic ion transport and metabolism	Molecular Function: calcium-transporting ATPase activity (GO:0005388);; Molecular Function: ATP binding (GO:0005524);; Cellular Component: endoplasmic reticulum (GO:0005783);; Biological Process: cellular calcium ion homeostasis (GO:0006874);; Molecular Function: hydrogen-exporting ATPase activity, phosphorylative mechanism (GO:0008553);; Cellular Component: integral component of membrane (GO:001…	K01537|0.0e+00|gmx:100800498|K01537 P-type Ca2+ transporter type 2C [EC:7.2.2.10] | (RefSeq) calcium-transporting ATPase, endoplasmic reticulum-type	--	[P]	Inorganic ion transport and metabolism	E1-E2 ATPase	Calcium-transporting ATPase, endoplasmic reticulum-type OS=Solanum lycopersicum OX=4081 GN=LCA1 PE=2 SV=1	P	Inorganic ion transport and metabolism	hypothetical protein GLYMA_07G053100 [Glycine max]
Glyma.12G231800.Wm82.a2.v1	6.55771	18.54	3.51201e-27	1.53495	up	--		Molecular Function: protein serine/threonine kinase activity (GO:0004674);; Molecular Function: ATP binding (GO:0005524);; Cellular Component: plasma membrane (GO:0005886);; Cellular Component: integral component of membrane (GO:0016021);; Biological Process: protein autophosphorylation (GO:0046777);;	K13416|2.3e-68|bna:106368734|K13416 brassinosteroid insensitive 1-associated receptor kinase 1 [EC:2.7.10.1 2.7.11.1] | (RefSeq) BRASSINOSTEROID INSENSITIVE 1-associated receptor kinase 1	MAPK signaling pathway - plant (ko04016);; Plant hormone signal transduction (ko04075);; Plant-pathogen interaction (ko04626)	--	--	Protein tyrosine and serine/threonine kinase	Probable LRR receptor-like serine/threonine-protein kinase At1g53440 OS=Arabidopsis thaliana OX=3702 GN=At1g53440 PE=2 SV=2	T	Signal transduction mechanisms	probable LRR receptor-like serine/threonine-protein kinase At1g53430 isoform X1 [Glycine max]
Glyma.03G003000.Wm82.a2.v1	3.45547	7.33566	8.15343e-14	1.12102	up	--		Molecular Function: protein serine/threonine kinase activity (GO:0004674);; Molecular Function: ATP binding (GO:0005524);; Cellular Component: integral component of membrane (GO:0016021);; Biological Process: recognition of pollen (GO:0048544);;	K01180|9.7e-57|cmax:111487562|K01180 endo-1,3(4)-beta-glucanase [EC:3.2.1.6] | (RefSeq) uncharacterized protein LOC111487562	--	--	--	Protein kinase domain	Putative receptor protein kinase ZmPK1 OS=Zea mays OX=4577 GN=PK1 PE=2 SV=2	T	Signal transduction mechanisms	putative receptor protein kinase ZmPK1 [Glycine max]
Glyma.19G132300.Wm82.a2.v1	3.39929	7.1529	1.54582e-07	1.00986	up	[T]	Signal transduction mechanisms	Biological Process: phosphorelay signal transduction system (GO:0000160);;	K14492|7.2e-117|gmx:100814494|K14492 two-component response regulator ARR-A family | (RefSeq) uncharacterized protein LOC100814494	Plant hormone signal transduction (ko04075)	[K]	Transcription	Response regulator receiver domain	Two-component response regulator ARR9 OS=Arabidopsis thaliana OX=3702 GN=ARR9 PE=1 SV=1	K	Transcription	hypothetical protein GLYMA_19G132300 [Glycine max]
Glyma.04G250600.Wm82.a2.v1	3.20775	0.697455	1.40248e-13	-2.14319	down	--	--	Cellular Component: plasma membrane (GO:0005886);; Cellular Component: integral component of membrane (GO:0016021);; Molecular Function: transmembrane transporter activity (GO:0022857);;	K17500|3.3e-55|nto:104085001|K17500 integrin-linked kinase-associated serine/threonine phosphatase 2C [EC:3.1.3.16] | (RefSeq) WAT1-related protein At3g18200 isoform X1	--	--	--	EamA-like transporter family	WAT1-related protein At4g08300 OS=Arabidopsis thaliana OX=3702 GN=At4g08300 PE=2 SV=1	S	Function unknown	uncharacterized protein LOC100811114 [Glycine max]
Glyma.16G056300.Wm82.a2.v1	0.394474	1.36103	8.55229e-06	1.78845	up	[F]	Nucleotide transport and metabolism	Biological Process: deoxyribonucleotide biosynthetic process (GO:0009263);; Molecular Function: oxidoreductase activity (GO:0016491);;	K10808|3.4e-194|gmx:100820622|K10808 ribonucleoside-diphosphate reductase subunit M2 [EC:1.17.4.1] | (RefSeq) ribonucleoside-diphosphate reductase small chain	Purine metabolism (ko00230);; Pyrimidine metabolism (ko00240);; Glutathione metabolism (ko00480)	[F]	Nucleotide transport and metabolism	Ribonucleotide reductase, small chain	Ribonucleoside-diphosphate reductase small chain OS=Nicotiana tabacum OX=4097 PE=2 SV=1	F	Nucleotide transport and metabolism	ribonucleoside-diphosphate reductase small chain [Glycine max]
Glyma.13G277000.Wm82.a2.v1	26.3169	7.51395	1.96693e-26	-1.84762	down	--	--	Cellular Component: integral component of membrane (GO:0016021);;	--	--	--	--	--	--	--	--	uncharacterized protein LOC100777109 precursor [Glycine max]
Glyma.16G001600.Wm82.a2.v1	2.0764	4.98042	3.45017e-12	1.29264	up	[R]	General function prediction only	Cellular Component: Golgi apparatus (GO:0005794);; Biological Process: plant-type secondary cell wall biogenesis (GO:0009834);; Cellular Component: integral component of membrane (GO:0016021);; Biological Process: xylan metabolic process (GO:0045491);; Biological Process: xylan biosynthetic process (GO:0045492);;	K18801|4.6e-160|gmx:100812805|K18801 glucuronoxylan 4-O-methyltransferase [EC:2.1.1.112] | (RefSeq) glucuronoxylan 4-O-methyltransferase 1	--	--	--	Polysaccharide biosynthesis	Glucuronoxylan 4-O-methyltransferase 1 OS=Arabidopsis thaliana OX=3702 GN=GXM1 PE=1 SV=1	S	Function unknown	glucuronoxylan 4-O-methyltransferase 1 [Glycine max]
Glyma.13G319100.Wm82.a2.v1	1.15946	2.77312	0.000721945	1.22019	up	--	--	--	--	--	--	--	--	--	--	--	hypothetical protein glysoja_021034 [Glycine soja]
Glyma.04G255800.Wm82.a2.v1	3.29521	9.41649	3.82045e-24	1.54721	up	[R]	General function prediction only	Cellular Component: Golgi apparatus (GO:0005794);; Biological Process: plant-type secondary cell wall biogenesis (GO:0009834);; Molecular Function: glucuronoxylan 4-O-methyltransferase activity (GO:0030775);; Biological Process: xylan metabolic process (GO:0045491);; Biological Process: xylan biosynthetic process (GO:0045492);;	K18801|1.1e-175|gmx:100780444|K18801 glucuronoxylan 4-O-methyltransferase [EC:2.1.1.112] | (RefSeq) glucuronoxylan 4-O-methyltransferase 1	--	--	--	Polysaccharide biosynthesis	Glucuronoxylan 4-O-methyltransferase 3 OS=Arabidopsis thaliana OX=3702 GN=GXM3 PE=1 SV=1	S	Function unknown	glucuronoxylan 4-O-methyltransferase 1 [Glycine max]
[truncated: 1,563 more rows]
